# Supplementary material for: Detecting cervical precancer and reaching underscreened women by using HPV testing on self samples: updated meta-analyses
Source: PubMed Central journal article supplement — BMJ. 2018 Dec 5;363:k4823. doi: 10.1136/bmj.k4823 (PMC6278587; doi:10.1136/bmj.k4823), 2018-12-05
Supplement: arbm046713.ww1.pdf [file arbm046713.ww1.pdf]

# Supplementary materials

## Table of Contents

|                                                                                                                                  |    |
|----------------------------------------------------------------------------------------------------------------------------------|----|
| 1. Study protocols (including objectives, PICOS, bibliographic sources, literature search strings).....                          | 2  |
| 1.1. Objectives .....                                                                                                            | 2  |
| 1.1.1. Primary objectives.....                                                                                                   | 2  |
| 1.1.2. Secondary objectives.....                                                                                                 | 2  |
| 1.2. Clinical questions.....                                                                                                     | 2  |
| 1.3. PICOS components.....                                                                                                       | 3  |
| 1.3.1. PICOS 1: Clinical accuracy of HPV testing on self-samples.....                                                            | 3  |
| 1.3.2. PICOS 2: Potential of strategies providing self-samplers to increase population coverage .....                            | 3  |
| 1.4. Literature retrieval strings.....                                                                                           | 4  |
| 1.4.1. Clinical accuracy of HPV testing on self-samples .....                                                                    | 4  |
| 1.4.2. Potential of strategies providing self-samplers to increase population coverage.....                                      | 5  |
| 2. PRISMA flow charts of study retrieval and selection .....                                                                     | 6  |
| 2.1. Meta-analysis on accuracy of self-samples.....                                                                              | 6  |
| 2.2. Meta-analysis on the response to the offer of self-samples .....                                                            | 7  |
| 3. Characteristics of the studies included in the meta-analysis of the accuracy of hrHPV testing on self-samples .....           | 8  |
| 3.1. Study design/enrolled subjects.....                                                                                         | 8  |
| 3.2. Details on test, collection devices, storage or transport media, verification disease status .....                          | 15 |
| 3.3. Used collection devices.....                                                                                                | 24 |
| 3.4. Used media for transport and storage of cervical cell material .....                                                        | 25 |
| 3.5. Used hrHPV tests.....                                                                                                       | 27 |
| 4. Characteristics of the randomized trials comparing strategies including offering self-samples with control interventions..... | 29 |
| 5. Assessment of the quality of diagnostic studies .....                                                                         | 38 |
| 6. Assessment of risk of bias in randomized trials.....                                                                          | 41 |
| 7. Absolute accuracy of hrHPV DNA testing on self-samples.....                                                                   | 42 |
| 8. Relative accuracy of hrHPV testing on self- compared to clinician-samples.....                                                | 43 |
| 9. Effect of covariates on the relative accuracy of hrHPV testing on self- vs to clinician samples .....                         | 47 |
| 9.1. Test effects .....                                                                                                          | 47 |
| 9.2. Self-sampling device effects .....                                                                                          | 48 |
| 9.3. Transport/storage medium effects.....                                                                                       | 49 |
| 9.4. Influence of study quality/design.....                                                                                      | 49 |

|                                                                                            |    |
|--------------------------------------------------------------------------------------------|----|
| 9.5. Small study effects, publication bias .....                                           | 51 |
| 10. Participation in the self-sampling arm and control arm of RCTs .....                   | 53 |
| 11. Specimen adequacy, test positivity rate, follow-up adherence, detection of CIN2+ ..... | 58 |
| 12. Research agenda.....                                                                   | 63 |
| 13. Reference List .....                                                                   | 64 |

## 1. Study protocols (including objectives, PICOS, bibliographic sources, literature search strings)

### 1.1. Objectives

#### 1.1.1. Primary objectives

- To evaluate the accuracy to detect cervical precancer of hrHPV testing on samples taken by the woman her-self.
- To evaluate the potential to reach women who do not participate in the regular screening programme by offering self-samplers.

#### 1.1.2. Secondary objectives

##### *Accuracy*

To assess the variation in the accuracy of HPV testing on self-samples by HPV assay, self-sampling device and transport medium.

##### *Screening participation*

To compare the test adequacy, test-positivity rate, adherence to follow-up, positive predictive value, detection rate of precancer in women participating in a self-sample strategy and those participating in a conventional strategy.

### 1.2. Clinical questions

- 1) Is testing for presence of high-risk types of the human papillomavirus (hrHPV) on vaginal samples taken by the woman herself as accurate to detect cervical pre-cancer than hrHPV testing on a cervical sample taken by a health professional?
- 2) Does the diagnostic accuracy of HPV testing on self-samples vary by HPV assay?
- 3) Does the diagnostic accuracy of HPV testing on self-samples vary by self-sampler or transport medium?
- 4) Is screening attendance higher when under-screened populations are offered a self-sampling device compared to usual practice?

## 1.3. PICOS components

### 1.3.1. PICOS 1: Clinical accuracy of HPV testing on self-samples

**Population:** women participating in cervical cancer screening, or women with cervical abnormalities detected previously and under follow-up, presenting at a colposcopy clinic.

**Index test:** hrHPV testing on a self-sample.

**Comparator tests:**

C1: hrHPV testing with the same assay on a clinician sample

**Outcomes:**

O1: absolute sensitivity and specificity for detection of CIN2+ or CIN3+ of the index test and of the comparator test.

O2: relative sensitivity and specificity for CIN2+ and CIN3+ of:

- hrHPV testing on a self-sample versus hrHPV testing on a clinician-sample

**Covariates:**

- HPV assay: amplification principle for the HPV assay (signal amplification, PCR), individual assay;
- Self-sampling device;
- Transport medium

**Studies:**

Cross-sectional diagnostic test accuracy studies where a vaginal self-sample and a cervical clinician-sample are taken and a hrHPV test is performed on the self-sample and on the clinician sample.

Randomised trials with hrHPV testing on a self-sample in one arm and on a clinician-sample in the other arm.

### 1.3.2. PICOS 2: Potential of strategies providing self-samplers to increase population coverage

**Population:** women who did not participate in the regular screening programme; women who did not respond to one or more previous invitations; women whose last screening is a long time ago; women belonging to under-screened communities.

**Intervention:** providing a self-sampling device for collection of a vaginal sample by the women her-self.

I1: "Mail-to-All": sending self-samplers to the woman's home address;

I2: "Opt-In": offering women the possibility to obtain a self-sampler: women can order a free self-sampling device; women can contact a service where they can get the self-sampling device;

I3: "Door-to-Door": Women are visited at home by a health care worker;

I4: women receive the self-sampling device when they contact a health service for whatever reason.

**Control action:**

C: standard procedure (invitation or reminder) or usual care where women have a sample taken by a clinician.

**Outcomes:**

O1: Response rate in intervention and control arms

O2: Relative response rate (intervention/control arms); response difference (intervention/control arms)

O3: proportion with unsatisfactory test results among screened women (arm1, arm2, ratio and difference)

O4: test-positivity rate among screened women with satisfactory sample (arm1, arm2, ratio and difference)

O5: adherence to further follow-up among screen-test positive women

O6: PPV for CIN2+ among screen-test positive women who complied with further follow-up

O7: detection rate of CIN2+ among all women, screened women, screen-positive women who complied to follow-up.

**Studies:**

Randomised controlled trials.

Controlled cohort studies

## 1.4. Literature retrieval strings

### 1.4.1. Clinical accuracy of HPV testing on self-samples

#### A. In Pubmed-Medline

#1: Cervix OR cervico\* OR cervica\*  
#2: Cancer OR carcinoma OR neoplas\* OR dysplas\* OR CIN[tw] OR CINII\*[tw] OR CIN2\*[tw] OR CINIII\*[tw] OR CIN3[tw] OR SIL[tw] OR SIL OR HSIL[tw] OR H-SIL OR LSIL[tw] OR L-SIL OR OR "low grade" OR low-grade OR mild OR equivocal OR borderline.  
#3: #1 AND #2.  
#4: HPV OR "Human Papillomavirus DNA Tests"[Mesh] OR "human papillomavirus" OR papillomavir\* OR viral OR virus  
#5: self-collection OR "self collection" OR self-sampling OR self-collect\* OR self-sampl\* OR self OR "Self-Examination"[Mesh]  
#6: #4 AND #5  
#7: #3 AND #6  
#8: Publication Date to April 2018.  
#9: #7 AND #8

#### B. In Embase

#1: 'cervix'/exp OR cervix OR cervico\* OR cervica\*  
#2: 'cancer'/exp OR cancer OR 'carcinoma'/exp OR carcinoma OR neoplas\* OR dysplas\* OR cin OR 'cin2' OR 'cin3' OR sil OR hsil OR h+sil OR lsil OR l+sil OR 'low grade' OR low+grade OR mild OR equivocal OR 'borderline'/exp OR borderline  
#3: 'hpv'/exp OR hpv OR 'human papillomavirus'/exp OR 'human papillomavirus' OR papillomavir\* OR viral OR 'virus'/exp OR virus  
#4: self+collection OR 'self collection' OR self+sampling OR 'self-sampling' OR self+collect\* OR self+sampl\* OR 'self'/exp OR self  
#5: #1 AND #2 AND #3 AND #4

With the following limits:

- Map to preferred terminology (with spell check)
- Also search as free text
- Include sub-terms/derivatives (explosion search)
- Search publications: all years

#### C. In Cochrane Library

#1: Cervix or cervico\* or cervica\*  
#2: Cancer or carcinoma or neoplas\* or dysplas\* or CIN or CIN2 or CIN3 or SIL or SIL or HSIL or H-SIL or LSIL or L-SIL or "low grade" or low-grade or mild or equivocal or borderline.  
#3: HPV or "human papillomavirus" or papillomavir\* or viral or virus  
#4: self-collection or "self collection" or self-sampling or "self-sampling" or self-collect\* or self-sampl\* or self

With the following limits:

- Cochrane reviews (reviews + protocols)
- Other reviews

Search for word variations

#### **1.4.2. Potential of strategies providing self-samplers to increase population coverage**

##### **In Pubmed-Medline**

(Cervix OR cervical) AND (HPV OR papillomavirus) AND (self-sampling OR self sampling OR self-collection OR self collection) AND (screening OR coverage OR participation OR knowledge OR acceptance)

## 2. PRISMA flow charts of study retrieval and selection

### 2.1. Meta-analysis on accuracy of self-samples

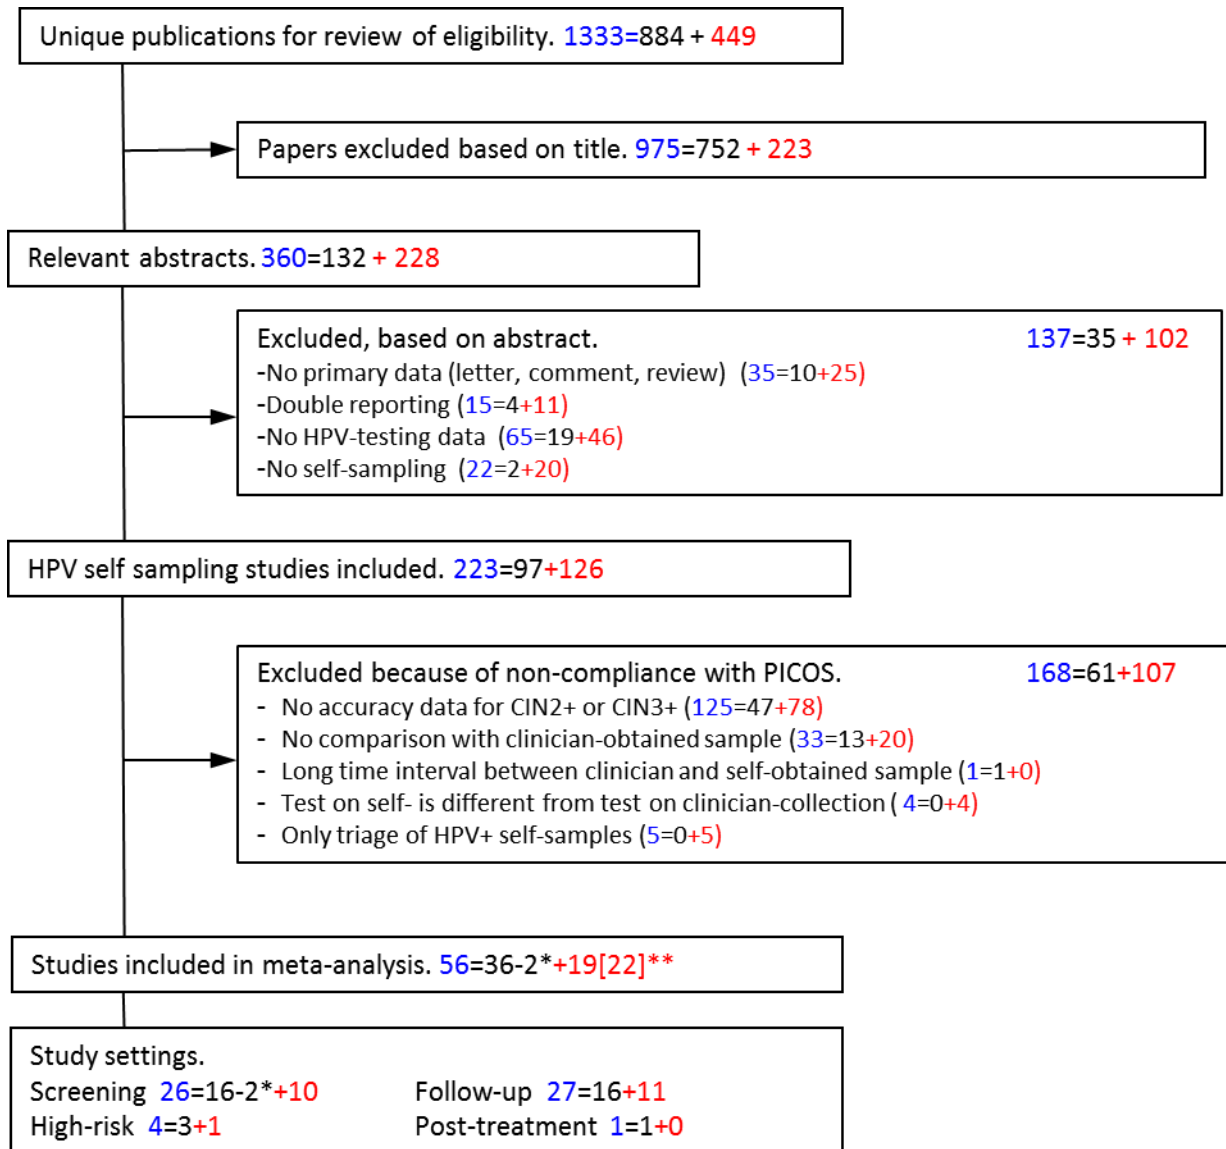

**Figure 1.** PRISMA flow chart summarizing the selection of eligible studies. Figures in black are those included in the search up to June 3, 2013<sup>1</sup>, those in red concern new references retrieved up to April 15, 2018. The total number resulting from all searches are in blue.

\* Two studies<sup>2,3</sup> included in the previous meta-analysis (Arbyn et al, Lancet Oncol 2014)<sup>1</sup> were excluded from the current updated review, since only cytology was performed on the clinician sample.

\*\* One report included four studies<sup>4</sup>.

## 2.2. Meta-analysis on the response to the offer of self-samples

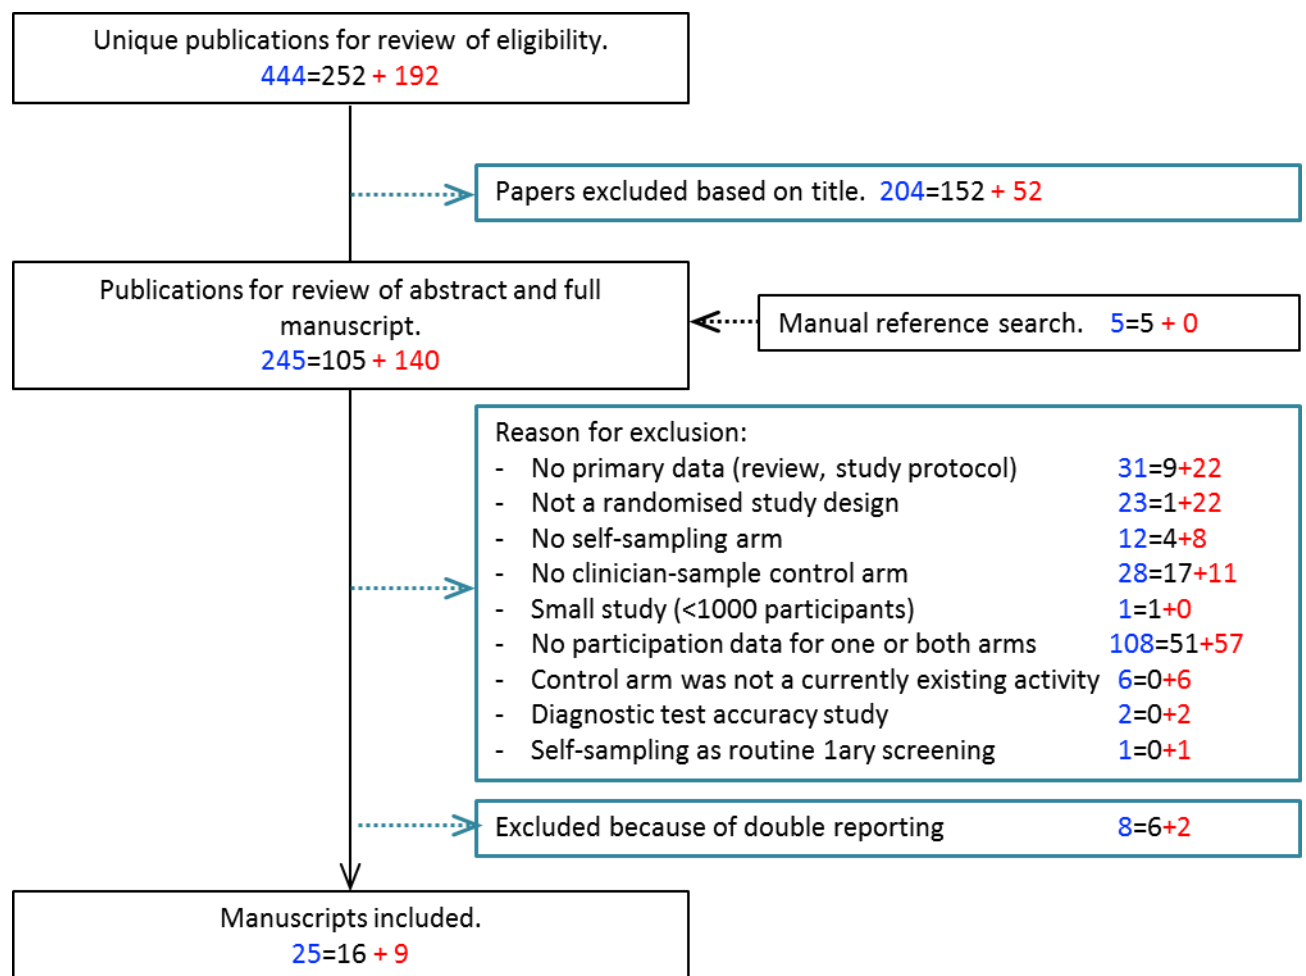

**Figure 2.** PRISMA flow chart summarizing the selection of eligible participation trials. Figures in black are those included in the search up to February 12, 2015<sup>5</sup>, those in red are references retrieved up to April 15, 2018. References in blue are the sum of all searches.

Throughout this Supplementary File, information regarding studies added after the previous meta-analyses of Arbyn et al Lancet 2014<sup>1</sup> and Verdoodt et al Eur J Cancer 2015<sup>5</sup> are in red text whereas information from studies already included in these meta-analyses is in black text.

### 3. Characteristics of the studies included in the meta-analysis of the accuracy of hrHPV testing on self-samples

#### 3.1. Study design/enrolled subjects

**Table 1.** Population and study characteristics (in black: studies included in the previous meta-analysis, in red: studies added between January 1, 2013 and April 15, 2018).

| Author, year<br>Country                | Study design                                             | Population/ setting                 | Inclusion & exclusion criteria                                                            | Study size | Age                                      |
|----------------------------------------|----------------------------------------------------------|-------------------------------------|-------------------------------------------------------------------------------------------|------------|------------------------------------------|
| <b>1. Morrison, 1992</b><br>USA        | Cross-sectional;<br>All had self- & clinician<br>samples | Follow up (colposcopy<br>clinic)    | Incl:<br>- equivocal cervical cytology                                                    | 25         | Not specified                            |
| <b>2. Hillemanns, 1999</b><br>Germany  | Cross-sectional;<br>All had self- & clinician<br>samples | Follow up (colposcopy<br>clinic)    | Not specified                                                                             | 247        | Not specified                            |
| <b>3. Sellors, 2000</b><br>Canada      | Cross-sectional;<br>All had self- & clinician<br>samples | Follow up (colposcopy<br>clinic)    | Incl:<br>- equivocal cervical cytology                                                    | 200        | Mean: 31.5y<br>(SD=9.4y)<br>Range: ≥ 18y |
| <b>4. Wright, 2000</b><br>South-Africa | Cross-sectional;<br>All had self- & clinician<br>samples | Screening                           | Incl:<br>- unscreened for ≥ 3y                                                            | 1415       | Median: 39y<br>Range: 35-65y             |
| <b>5. Belinson, 2001</b><br>China      | Cross-sectional;<br>All had self- & clinician<br>samples | Screening                           | Excl:<br>- pregnancy, history of cervical screening,<br>pelvic radiation, or hysterectomy | 1997       | Mean: 39.1y<br>(SE=3.16y)                |
| <b>6. Lorenzato, 2002</b><br>Brazil    | Cross-sectional;<br>All had self- & clinician<br>samples | Screening (high-risk<br>population) | Excl:<br>- cervix removed<br>- illness impeding participation                             | 253        | Mean: 38.1y<br>(SD=13.7y)<br>Median: 38y |



| <b>Author, year</b><br>Country                | <b>Study design</b>                                                         | <b>Population/ setting</b>                             | <b>Inclusion &amp; exclusion criteria</b>                                                                                                       | <b>Study size</b> | <b>Age</b>                                |
|-----------------------------------------------|-----------------------------------------------------------------------------|--------------------------------------------------------|-------------------------------------------------------------------------------------------------------------------------------------------------|-------------------|-------------------------------------------|
| <b>7. Nobbenhuis, 2002</b><br>The Netherlands | Cross-sectional;<br>All had self- & clinician samples                       | - Follow up + healthy participants (colposcopy clinic) | Incl:<br>- equivocal cervical cytology (very mild dyskaryosis or more severe results)<br>- normal cervical cytology                             | 71                | Mean: 35y                                 |
| <b>8. Garcia, 2003</b><br>Mexico, Peru, USA   | Cross-sectional;<br>All had self- & clinician samples                       | Follow up (colposcopy clinic)                          | Excl:<br>- history of hysterectomy, vaginal trauma or laceration<br>- pregnancy                                                                 | 334               | Mean: 36.9y                               |
| <b>9. Salmeron, 2003</b><br>Mexico            | Cross sectional;<br>All had self- & clinician samples                       | Screening                                              | Excl:<br>- history of CIN2+<br>- hysterectomy<br>- pregnancy                                                                                    | 7868              | Mean: 42.5y                               |
| <b>10. Brink, 2006</b><br>The Netherlands     | Cross-sectional;<br>All had self- & clinician samples                       | - Follow up + healthy participants (colposcopy clinic) | Incl:<br>- repeat equivocal cervical cytology                                                                                                   | 96                | Median: 35y<br>Range: 18-59y              |
| <b>11. Daponte, 2006</b><br>Greece            | Clinical prospective evaluation study;<br>All had self- & clinician samples | Follow up (colposcopy clinic)                          | Incl:<br>- histologically proven cervical lesion<br>Excl:<br>- HIV-positivity                                                                   | 98                | Not documented                            |
| <b>12. Girianelli, 2006</b><br>Brazil         | Cross-sectional;<br>All had self- & clinician samples                       | Screening (high-risk population)                       | Incl:<br>- unscreened for >3years<br>Excl:<br>- pregnancy<br>- delivery <6months ago<br>- never having had sexual intercourse<br>- hysterectomy | 1777              | Median: 39y<br>Mean: 39y<br>Range: 25-59y |
| <b>13. Holanda, 2006</b><br>Brazil            | Cross-sectional;<br>All had self- & clinician samples                       | Screening                                              | Incl:<br>- sexually active<br>Excl:<br>- pregnancy<br>- hysterectomy                                                                            | 878               | Range: 15-69y                             |
| <b>14. Seo, 2006</b><br>South-Korea           | Cross-sectional;<br>All had self- & clinician samples                       | Follow up (colposcopy clinic)                          | Incl:<br>- equivocal cervical cytology (ASC-US+)                                                                                                | 118               | Mean: 46.2y                               |

| <b>Author, year</b><br>Country               | <b>Study design</b>                                   | <b>Population/ setting</b>                      | <b>Inclusion &amp; exclusion criteria</b>                                                                                                                                                                                                                                                                      | <b>Study size</b> | <b>Age</b>                                 |
|----------------------------------------------|-------------------------------------------------------|-------------------------------------------------|----------------------------------------------------------------------------------------------------------------------------------------------------------------------------------------------------------------------------------------------------------------------------------------------------------------|-------------------|--------------------------------------------|
| <b>15. Szarewski, 2007</b><br>United Kingdom | Cross-sectional;<br>All had self- & clinician samples | Screening                                       | Excl:<br>- history of ablative or excisional treatment of the cervix                                                                                                                                                                                                                                           | 920               | Median: 29y (pop 1)<br>Median: 41y (pop 2) |
| <b>16. Qiao, 2008</b><br>China               | Cross sectional;<br>All had self- & clinician samples | Screening                                       | Excl:<br>- pregnancy<br>- history of CIN, pelvic radiation, or hysterectomy                                                                                                                                                                                                                                    | 2530              | Mean: 43y<br>Range: 30-55y                 |
| <b>17. Bhatla, 2009</b><br>India             | Cross sectional;<br>All had self- & clinician samples | Screening (high-risk population)                | Incl:<br>- sexually active women<br>- persistent vaginal discharge, intermenstrual or postcoital bleeding or an unhealthy cervix<br>Excl:<br>- age <30 years<br>- unmarried<br>- hysterectomy or prior surgical procedures on the cervix<br>- gross tumour on the cervix<br>- pregnancy                        | 546               | Median: 36y                                |
| <b>18. Balasubramanian, 2010</b><br>USA      | Cross-sectional;<br>All had self- & clinician samples | Screening (high-risk population)                | Excl:<br>- pregnancy<br>- chronically immunocompromised<br>- prior treatments for cervical neoplasia                                                                                                                                                                                                           | 1665              | Median: 23y<br>Range: 18-50y               |
| <b>19. Gustavsson, 2011</b><br>Sweden        | Cross-sectional;<br>All had self- & clinician samples | Follow up (colposcopy clinic)                   | Incl:<br>- unscreened for $\geq 6$ years<br>- HPV-positivity in a previous self-obtained sample §                                                                                                                                                                                                              | 50                | Range: 39-60y                              |
| <b>20. Taylor, 2011</b><br>South-Africa      | Cross-sectional;<br>All had self- & clinician samples | Post-treatment follow up + healthy participants | Incl:<br>- subjects derived from randomized clinical trial evaluating the safety and efficacy of two screen-and-treat approaches for cervical cancer prevention<br>- women who had undergone cryotherapy in the two screen and- treat groups + all women in the control group who did not undergo cryotherapy. | 2670              | Mean: 43y<br>Range: 35-65y                 |

| <b>Author, year<br/>Country</b>                       | <b>Study design</b>                                                                | <b>Population/ setting</b>       | <b>Inclusion &amp; exclusion criteria</b>                                                                                                                                    | <b>Study size</b> | <b>Age</b>                   |
|-------------------------------------------------------|------------------------------------------------------------------------------------|----------------------------------|------------------------------------------------------------------------------------------------------------------------------------------------------------------------------|-------------------|------------------------------|
| <b>21. Twu, 2011</b><br>Taiwan                        | Cross-sectional;<br>All had self- & clinician<br>samples                           | Follow up (colposcopy<br>clinic) | Incl:<br>- unscreened for $\geq 3$ years<br>Excl:<br>- acute cervicitis or vaginitis<br>- pregnancy<br>- menstruating period<br>- sexual intercourse $<2$ d before the study | 252               | Median: 42y<br>Range: 26-79y |
| <b>22. Belinson, 2012</b><br>China                    | Cross-sectional;<br>All had self- & clinician<br>samples                           | Screening                        | Incl:<br>- unscreened for $\geq 3$ years<br>Excl:<br>- pregnancy<br>- hysterectomy<br>- history of pelvic radiation                                                          | 8556              | Mean: 38.9y<br>Range: 25-59y |
| <b>23. Dijkstra, 2012</b><br>The Netherlands          | Cross-sectional;<br>All had self- & clinician<br>samples                           | Follow up (colposcopy<br>clinic) | Incl:<br>- equivocal cervical cytology (moderate<br>dyskaryosis or more severe results)<br>- post-coital bleeding (normal cytology)                                          | 135               | Median: 34y                  |
| <b>24. Longatto-Filho,<br/>2012</b> Argentina, Brazil | Cross-sectional and<br>prospective cohort;<br>All had self- & clinician<br>samples | Screening                        | Incl:<br>- consecutive series of women at their first<br>visit to the clinic                                                                                                 | 12114             | Mean: 37y*<br>Range: 14-67y* |
| <b>25. van Baars, 2012</b><br>The Netherlands         | Cross-sectional;<br>All had self- & clinician<br>samples                           | Follow up (colposcopy<br>clinic) | Incl:<br>- equivocal cervical cytology                                                                                                                                       | 134               | Mean: 40y<br>Range: 21-66y   |
| <b>26-28. Zhao, 2012</b><br>China                     | Cross-sectional;<br>All had self- & clinician<br>samples                           | Screening                        | Incl:<br>- sexually active<br>- having an intact uterus<br>- unscreened for $\geq 5$ years<br>Excl:<br>- pregnancy<br>- history of CIN2+, or pelvic radiation                | 13004             | Mean: 37.9y<br>(SD=11.2y)    |
| <b>29. Darlin, 2013</b><br>Sweden                     | Cross-sectional;<br>All had self- & clinician<br>samples                           | Follow up (colposcopy<br>clinic) | Incl:<br>- equivocal cervical cytology                                                                                                                                       | 108               | Mean: 34y<br>Range: 18-65y   |

| <b>Author, year</b><br>Country                | <b>Study design</b>                                                                              | <b>Population/ setting</b>                    | <b>Inclusion &amp; exclusion criteria</b>                                                                                                         | <b>Study size</b>             | <b>Age</b>                   |
|-----------------------------------------------|--------------------------------------------------------------------------------------------------|-----------------------------------------------|---------------------------------------------------------------------------------------------------------------------------------------------------|-------------------------------|------------------------------|
| <b>30. Geraets, 2013</b><br>Spain             | Cross-sectional;<br>All had self- & clinician samples                                            | Follow up (colposcopy clinic)                 | Incl:<br>- equivocal cervical cytology                                                                                                            | 182                           | Median: 34y<br>Range: 16-76y |
| <b>31. Guan, 2013</b><br>China                | Cross-sectional;<br>All had self- & clinician samples                                            | Screening                                     | Incl:<br>- VIA or VILI positive<br>- VIA or VILI negative (random sample)                                                                         | 174                           | Not documented               |
| <b>32. Jentschke, 2013a</b><br>Germany        | Retrospective;<br>All had self- & clinician samples                                              | Follow up (colposcopy clinic)                 | Not documented                                                                                                                                    | 72                            | Mean: 37y<br>Range: 16-68y   |
| <b>33. Jentschke, 2013b</b><br>Germany        | Retrospective;<br>All had self- & clinician-samples                                              | Follow up (colposcopy clinic)                 | Not documented                                                                                                                                    | 49                            | Mean: 36y<br>Range: 18-68y   |
| <b>34. Nieves, 2013</b><br>Mexico             | Cross-sectional;<br>All had self- & clinician samples                                            | Screening                                     | Excl:<br>- pregnancy<br>- history of hysterectomy or pelvic irradiation                                                                           | 2049                          | Median: 39y<br>Range: 30-50y |
| <b>35. Zhao, 2013</b><br>China                | Cross-sectional:<br>All had self- & clinical-samples.                                            | Screening                                     | Excl:<br>- previously diagnosed with cervical cancer<br>- no cervix<br>- pregnancy<br>- unmarried<br>- never having had sexual intercourse.       | 7421                          | Range: 25-65y.               |
| <b>36. Chernesky, 2014</b><br>Canada          | Cross-sectional.<br>All had self and clinician samples.<br>Clinicians took also vaginal samples. | Follow-up (colposcopy clinic)                 | Not reported                                                                                                                                      | 580                           | Mean: 39y.<br>Range: 18-63y. |
| <b>37. Hesselink, 2014</b><br>The Netherlands | Clinical test validation study.<br>Cases & controls contributed self- and clin samples.          | Cases & controls from a screening population. | Cases with CIN2+.<br>Controls: women with normal cytological findings who were without evidence of CIN2 in up to 2 years of follow-up monitoring. | 70 CIN2+ cases, 824 controls. | Mean: 41y.<br>Range: 30-60y. |

| Author, year<br>Country                                     | Study design                                                                                                       | Population/ setting                                                                             | Inclusion & exclusion criteria                                                                                                                                                                  | Study size                           | Age                                          |
|-------------------------------------------------------------|--------------------------------------------------------------------------------------------------------------------|-------------------------------------------------------------------------------------------------|-------------------------------------------------------------------------------------------------------------------------------------------------------------------------------------------------|--------------------------------------|----------------------------------------------|
| <b>38-41. Jeronimo, 2014</b><br>India, Nicaragua,<br>Uganda | Cross-sectional study in 3 countries: India (2 settings), Uganda, Nicaragua.<br>All had self- & clinician samples. | Screening                                                                                       | Excl:<br>-Never having had sexual intercourse (in Nicaragua, Uganda). In India: not married).<br>-History of CIN or cervical cancer<br>-Hysterectomy<br>-Pregnancy until 3 months post-delivery | 16,951                               | India, Nicaragua: 30-59y.<br>Uganda: 25-60y. |
| <b>42. Wang, 2014</b><br>China                              | Cross-sectional;<br>All had self- & clinician samples.                                                             | Follow up (colposcopy clinic)                                                                   | Excl:<br>-pregnancy<br>-history of CIN, cervical cancer, hysterectomy                                                                                                                           | 379                                  | Range: 25-65y.                               |
| <b>43. Zhang, 2014</b><br>China                             | Cross-sectional;<br>All has self- & clinician samples                                                              | Screening                                                                                       | Women who participated in a multi-center screening programme. No details about the exclusion criteria.                                                                                          | 806                                  | Range: 16-54y.                               |
| <b>44. Boggan, 2015</b><br>Haiti                            | Cross-sectional;<br>All had self- & clinician-samples.                                                             | Screening                                                                                       | Incl:<br>- sexual intercourse $\geq 1$ /lifetime<br>Excl:<br>- current pregnancy, hysterectomy, active menstruation.                                                                            | 1845                                 | Mean: 41y.<br>Range: 25-65y.                 |
| <b>45. Porras, 2015</b><br>Costa Rica                       | Cross-sectional;<br>All had self- & a subset had clinician samples.                                                | HPV vaccine trial, 6M after enrolment.                                                          | - age 18-25y<br>- sexually experienced women.                                                                                                                                                   | 5109: self 615 among them also clin. | Mean: 22y.<br>Range: 18-25y.                 |
| <b>46. Chen, 2016 (a), Gen Mol</b><br>China                 | Cross-sectional;<br>All had self- & clinician samples.                                                             | Follow-up (colposcopy)                                                                          | Incl:<br>- 18-56y<br>- ASCUS+ and hrHPV positive (HC2).                                                                                                                                         | 197                                  | Mean: 39 y.<br>Range: 18-56y.                |
| <b>47. Chen, 2016 (b), J Ob Gyn</b><br>China                | Cross-sectional;<br>All had self- & clinician samples.                                                             | Outpatient gyn clinic (one group had positive screening results and other no cervical lesions). | Incl:<br>- $\geq 18$ y<br>- $\frac{1}{2}$ patients with cervical lesions; $\frac{1}{2}$ patients without cervical lesions or cervicitis<br>Excl:<br>- Lesion status categorized incorrectly.    | 202                                  | Mean: 41y.<br>Range: 21-79y.                 |
| <b>48. Jentschke, 2016</b><br>Germany                       | Cross-sectional;<br>All had self- & clinician samples.                                                             | Follow-up (colposcopy clinic)                                                                   | Excl:<br>- hysterectomy<br>- pregnancy.                                                                                                                                                         | 136                                  | Mean: 36 y.<br>Range: 17-78y.                |

| Author, year<br>Country                    | Study design                                                               | Population/ setting                                                                     | Inclusion & exclusion criteria                                                                                                                                                                        | Study size             | Age                            |
|--------------------------------------------|----------------------------------------------------------------------------|-----------------------------------------------------------------------------------------|-------------------------------------------------------------------------------------------------------------------------------------------------------------------------------------------------------|------------------------|--------------------------------|
| <b>49. Qin, 2016</b><br>China              | Cross-sectional;<br>All had self- & clinician samples.                     | HIV clinic                                                                              | Excl:<br>- previously diagnosed with CIN<br>- history of cervical cancer<br>- hysterectomy<br>- pregnancy                                                                                             | 291                    | Mean: 39y.<br>Range: 25-65y.   |
| <b>50. Stanczuk, 2016</b><br>Scotland      | Cross-sectional;<br>All had self- & clinician samples.                     | Screening                                                                               | Excl:<br>- previously diagnosed with CIN2+.                                                                                                                                                           | 5,318                  | Mean: 41y.<br>Range: 18-76y.   |
| <b>51. Aiko, 2017</b><br>Japan             | Cross-sectional;<br>All had self- & clinician samples.                     | Follow-up (colposcopy clinic)                                                           | Incl:<br>- Women with ASC-US+<br>- 20-69y<br>- Visiting study colposcopy clinic<br>Excl.<br>- pregnancy<br>- use of vaginal suppositories<br>- history of conisation<br>- cytology indicating cancer. | 136                    | Range: 20-69y.                 |
| <b>52. Ascitto, 2017</b><br>Sweden         | Cross-sectional;<br>All had self- & clinician samples.                     | Follow-up or symptomatic patients (colposcopy clinic)                                   | Not documented.                                                                                                                                                                                       | 218                    | Mean: 35y.<br>Range: 19-71.    |
| <b>53. Catarino, 2017</b><br>Switzerland   | Cross-sectional;<br>All had self- & clinician samples.                     | Follow-up (colposcopy clinic)                                                           | Incl: $\geq 18$ y, understand instructions, informed consent.<br>Excl: pregnancy, hysterectomy.                                                                                                       | 150                    | Median: 32y.<br>Range: 18-69y. |
| <b>54. Leeman, 2017</b><br>The Netherlands | Cross-sectional;<br>All had self- & clinician samples.                     | Follow-up (colposcopy clinic)                                                           | No details provided.                                                                                                                                                                                  | 91                     | Range: 18-60y.                 |
| <b>55. Ascitto, 2018</b><br>Sweden         | Cross-sectional;<br>All had self-, urine & clinician-samples.              | Follow-up (colposcopy clinic)                                                           | Excl: hysterectomy, history gynecologic cancer, current cancer treatment.                                                                                                                             | 176                    | Mean: 34y.<br>Range: 20-68y.   |
| <b>56. Leinonen, 218</b><br>Norway†        | Cross-sectional;<br>All had 2 self-samples at home and a clinician-sample. | Patients with CIN3 or cancer received self-samples at home before visit for conisation. | Excl: women who did not have all specimens (2 self & 1 clin) or HPV tests.                                                                                                                            | 187 CIN3<br>53 cancers | Mean: 38 y.<br>Range: 21-80y.  |

\* retrieved from Syrjänen, 2005 (Anticancer Research)

§ Sanner K, Wikstrom I, Strand A, Lindell M, Wilander E. Self-sampling of the vaginal fluid at home combined with high-risk hrHPV testing. Br J Cancer 2009; 101(5):871-874.

† Only women with CIN3+ included, therefore specificity cannot be assessed.

### 3.2. Details on test, collection devices, storage or transport media, verification disease status

**Table 2.** Characteristics of tests and disease verification (in black: studies included in the previous meta-analysis, in red studies added between 1 January 2013 and 15 April 2018).

| Author, year               | Tests                                | Assay                                        | Sampling device                                                                                               | Storage medium                                                               | Golden standard                                                                                                                     | Test cut-off                       | Outcome        |
|----------------------------|--------------------------------------|----------------------------------------------|---------------------------------------------------------------------------------------------------------------|------------------------------------------------------------------------------|-------------------------------------------------------------------------------------------------------------------------------------|------------------------------------|----------------|
| <b>1. Morrison, 1992</b>   | Self: HRHPV<br>Clin: hrHPV           | PCR (L1 consensus)                           | Self: lavage (My-PAP)                                                                                         | ethanol<br>carbowax                                                          | Colposcopy + colpo-directed biopsy<br>- All participants                                                                            | Not Specified                      | CIN2+          |
| <b>2. Hillemanns, 1999</b> | Self: hrHPV<br>Clin: hrHPV           | HC2                                          | Self: cytobrush<br>Clin: cytobrush                                                                            | Self: placed into a specimen collection tube                                 | Colposcopy + colpo-directed biopsy and/or endocervical curettage<br>- All participants                                              | HC2: 1pg/ml                        | CIN2+          |
| <b>3. Sellors, 2000</b>    | Self: hrHPV<br>Clin: hrHPV, cytology | hrHPV: HC2, PCR (L1 consensus)<br>Cyto: cPap | Self: Dacron Polyester Swab<br>Clin: soft cone-shaped cervical brush, Ayre spatula, and Dacron Polyester Swab | Self: STM<br>Clin brush: STM<br>Clin swab: sterile phosphate-buffered saline | Colposcopy + colpo-directed biopsy and/or endocervical curettage<br>- All participants                                              | HC2: 1pg/ml                        | CIN2+          |
| <b>4. Wright, 2000</b>     | Self: hrHPV<br>Clin: hrHPV, cytology | hrHPV: HC2<br>Cyto: cPap                     | Self: Dacron Polyester Swab<br>Clin: Accelon Combi Cervical Biosampler (cyto), conical brush (hrHPV)          | STM                                                                          | Colposcopy + colpo-directed biopsy/loop excision or endocervical curettage<br>- Participants with at least one positive test result | HC2: 1pg/ml<br>Cyto: ASCUS+, LSIL+ | CIN2+          |
| <b>5. Belinson, 2001</b>   | Self: hrHPV<br>Clin: hrHPV, cytology | hrHPV: HC2<br>Cyto: LBC (ThinPrep)           | Self: Dacron Swab<br>Clin: plastic spatula, endocervical brush                                                | Self: STM<br>Clin: PreservCyt                                                | Colposcopy + colpo-directed biopsy + multiple random biopsies<br>- All participants                                                 | HC2: 1 pg/ml                       | CIN2+          |
| <b>6. Lorenzato, 2002</b>  | Self: hrHPV<br>Clin: hrHPV           | PCR (L1 consensus, MY 9/11)                  | Self: cotton swab<br>Clin: Ayre spatula, cytobrush                                                            | Self + clin: PBS                                                             | Colposcopy + colpo-directed biopsy<br>- All participants                                                                            | Not documented                     | CIN2+<br>CIN3+ |

| Author, year                | Tests                                | Assay                                                          | Sampling device                                                                                     | Storage medium                                     | Golden standard                                                                                                                                    | Test cut-off                  | Outcome        |
|-----------------------------|--------------------------------------|----------------------------------------------------------------|-----------------------------------------------------------------------------------------------------|----------------------------------------------------|----------------------------------------------------------------------------------------------------------------------------------------------------|-------------------------------|----------------|
| <b>7. Nobbenhuis, 2002</b>  | Self: hrHPV<br>Clin: hrHPV, cytology | hrHPV: PCR (GP 5+/6+)<br>Cyto: cPap                            | Self: lavage<br>Clin: lavage, Cervex-Brush                                                          | Self + Clin: PBS                                   | Colposcopy + colpo-directed biopsy<br>- All participants                                                                                           | Cyto: ASC-US+                 | CIN2+          |
| <b>8. Garcia, 2003</b>      | Self: hrHPV<br>Clin: hrHPV, cytology | hrHPV: PCR (PGMY09/11, L1 consensus)<br>Cyto: LBC (ThinPrep)   | Self: cytobrush<br>Clin: Ayre spatula and endocervical brush                                        | Self: PreservCyt<br>Clin: methanol buffer solution | Colposcopy + colpo-directed biopsy (+ endocervical curettage)<br>- All participants                                                                | Cyto: ASCUS+                  | CIN2+          |
| <b>9. Salmeron, 2003</b>    | Self: hrHPV<br>Clin: hrHPV, cytology | hrHPV: HC2<br>Cyto: cPap                                       | Self: Dacron Swab<br>Clin: conical cytobrush                                                        | Self + Clin: STM                                   | Colposcopy + colpo-directed biopsy (+ endocervical curettage)<br>- Participants with at least one positive test result                             | HPV: 1 pg/ml<br>Cyto: ASC-US+ | CIN2+          |
| <b>10. Brink, 2006</b>      | Self: hrHPV<br>Clin: hrHPV, cytology | hrHPV: PCR – EIA (GP5+/6+)<br>Cyto: LBC (SurePath)             | Self: cervicovaginal lavage (Mermaid)<br>Clin: endocervical brush                                   | Self + Clin: SurePath                              | Colposcopy + colpo-directed biopsy<br>- Participants with equivocal cytology <sup>‡</sup>                                                          | Cyto: ASC-US+, HSIL+          | CIN2+          |
| <b>11. Daponte, 2006</b>    | Self: hrHPV<br>Clin: hrHPV           | PCR ( <i>L1</i> and <i>E6</i> type-specific primers for HPV16) | Self + Clin: cytobrush                                                                              | Self + Clin: PBS                                   | Colposcopy + colpo-directed biopsy<br>- All participants                                                                                           | Not documented                | CIN2+          |
| <b>12. Girianelli, 2006</b> | Self: hrHPV<br>Clin: hrHPV, cytology | hrHPV: HC2<br>Cyto: cPap, LBC (Citoliq)                        | Self: conical brush<br>Clin: conical brush (hrHPV, LBC), Ayre spatula and endocervical brush (cPap) | hrHPV: Citoliq                                     | Colposcopy + colpo-directed biopsy<br>- Participants with at least one positive test result<br>- Systematic sample of 70 women with negative tests | HPV: 1pg/ml<br>Cyto: ASC-US+  | CIN2+          |
| <b>13. Holanda, 2006</b>    | Self: hrHPV<br>Clin: hrHPV           | HC2                                                            | Self: collection brush<br>Clin: small conical brush                                                 | Self + Clin: UCM                                   | Colposcopy + colpo-directed biopsy<br>- All participants                                                                                           | 1pg/ml                        | CIN2+          |
| <b>14. Seo, 2006</b>        | Self: hrHPV<br>Clin: hrHPV           | hrHPV DNA Chip                                                 | Self: Dacron Polyester Swab<br>Clin: Dacron Polyester Swab                                          | Not documented                                     | Colposcopy + colpo-directed biopsy (+ endocervical curettage) or random biopsies<br>- All participants                                             |                               | CIN2+<br>CIN3+ |



| Author, year                     | Tests                                | Assay                                     | Sampling device                                                                                                    | Storage medium                                       | Golden standard                                                                                                                                              | Test cut-off                                        | Outcome        |
|----------------------------------|--------------------------------------|-------------------------------------------|--------------------------------------------------------------------------------------------------------------------|------------------------------------------------------|--------------------------------------------------------------------------------------------------------------------------------------------------------------|-----------------------------------------------------|----------------|
| <b>15. Szarewski, 2007</b>       | Self: hrHPV<br>Clin: hrHPV, cytology | hrHPV: HC2<br>Cyto: cPap                  | Self: cotton swab<br>Clin Cyto: pointed spatula, endocervical brush<br>Clin hrHPV: Cervical Sampler Brush          | Not documented                                       | Colposcopy + colpo-directed biopsy<br>- Participants with at least one positive test result<br>- Random sample (5%) of women with negative tests             | HPV: 1 pg/ml<br>Cyto: ASC-US+                       | CIN2+          |
| <b>16. Qiao, 2008</b>            | Self: hrHPV<br>Clin: hrHPV, cytology | hrHPV: CareHPV<br>Cyto: LBC (SurePath)    | Self: vaginal brush (careHPV)<br>Clin: nylon swab (LBC), cervical brush (care HPV)                                 | - HPV: collection medium (QIAGEN)<br>- LBC: SurePath | Colposcopy + colpo-directed biopsy and endocervical curettage<br>- All participants                                                                          | careHPV: 0.5 pg/ml, 1 pg/ml<br>Cyto: ASC-US+, LSIL+ | CIN2+<br>CIN3+ |
| <b>17. Bhatla, 2009</b>          | Self: hrHPV<br>Clin: hrHPV, cytology | hrHPV: HC2, PCR (PGMY09/11)<br>Cyto: cPap | Self: cervical sampling brush<br>Clin: Ayre spatula and endocervical brush (cyto), cervical sampling brush (hrHPV) | HPV: STM                                             | Colposcopy + colpo-directed biopsy<br>- All participants                                                                                                     | - HPV: 1pg/ml<br>- Cyto: ASC-US+, LSIL+             | CIN2+          |
| <b>18. Balasubramanian, 2010</b> | Self: hrHPV<br>Clin: hrHPV           | HC2                                       | Self: Dacron Swab<br>Clin: Dacron Swab                                                                             | hrHPV: STM                                           | Colposcopy + colpo-directed biopsy or random biopsy<br>- Participants with at least one positive test result<br>- Random sample of women with negative tests | HPV: 1 pg/ml                                        | CIN2+          |
| <b>19. Gustavson, 2011</b>       | Self: hrHPV<br>Clin: hrHPV           | PCR (primers for <i>E6/E7/L1</i> ) *      | Self: Viba-Brush<br>Clin: cytobrush                                                                                | Self + Clin: FTA cartridge                           | Colposcopy + colpo-directed biopsy<br>- All participants                                                                                                     | 10 Geq/PCR                                          | CIN2+          |
| <b>20. Taylor, 2011</b>          | Self: hrHPV<br>Clin: hrHPV, cytology | hrHPV: HC2<br>Cyto: cPap, LBC (ThinPrep)  | Self: Dacron Swab<br>Clin: plastic spatula, cytobrush                                                              | Self: STM<br>Clin: PreservCyt                        | Colposcopy + endocervical curettage and/or colpo-directed biopsy<br>- All participants                                                                       | HPV: 1 pg/mL<br>Cyto: ASC-US+, LSIL+                | CIN2+          |

| Author, year                    | Tests                                | Assay                                                                                      | Sampling device                                                                                      | Storage medium                                                                   | Golden standard                                                                                                                                         | Test cut-off                                         | Outcome         |
|---------------------------------|--------------------------------------|--------------------------------------------------------------------------------------------|------------------------------------------------------------------------------------------------------|----------------------------------------------------------------------------------|---------------------------------------------------------------------------------------------------------------------------------------------------------|------------------------------------------------------|-----------------|
| <b>21. Twu, 2011</b>            | Self: hrHPV<br>Clin: hrHPV           | PCR (MY9/11 nested GP5+/6+), HPV Blot                                                      | Self: cytobrush<br>Clin: Ayre spatula, cytobrush                                                     | Self + Clin: STM                                                                 | Colposcopy + colpo-directed biopsy<br>- participants with acetowhite lesions (VIA), or a positive cPap                                                  | - HPV Blot : 1-50 copies of HPV geq per PCR.         | CIN2+<br>CIN3+  |
| <b>22. Belinson, 2012</b>       | Self: hrHPV<br>Clin: hrHPV, cytology | Self hrHPV: Cervista, MALDI-TOF<br>Clin hrHPV: HC2, Cervista, MALDI-TOF<br>Clin cyto: cPap | Self: POI/NIH self-sampler, conical brush<br>Clin: broom sampler                                     | Self + clin: PreservCyt                                                          | Colposcopy + colpo-directed biopsy, or random biopsy and endocervical curettage<br>- Participants with at least one positive test result                | ASC-US                                               | CIN3+           |
| <b>23. Dijkstra, 2012</b>       | Self: hrHPV<br>Clin: hrHPV           | PCR (GP5+/6+)                                                                              | Self: Viba-Brush<br>Clin: Viba-Brush, Cervex-Brush                                                   | Self + Clin: PreservCyt                                                          | Colposcopy + colpo-directed biopsy, or random biopsy ( $\geq 1$ )<br>- All participants                                                                 | Not documented                                       | CIN2+           |
| <b>24. Longatto-Filho, 2012</b> | Self: hrHPV<br>Clin: hrHPV, cytology | hrHPV: HC2<br>Cyto: cPap, LBC (SurePath), LBC (Citoliq)                                    | Self HPV: tampon<br>Clin HPV: cervical swab<br>Clin cyto: cervix brush (Surepath), DNA-Citoliq Brush | Self + Clin HPV: STM<br>Clin Cyto: SurePath, Citoliq                             | Colposcopy + colpo-directed biopsy<br>- Participants with at least one positive test result<br>- Random sample (>5%) of women with negative tests **    | HPV: 1pg/ml hrHPV<br><br>Cyto: ASC-US+, LSIL+, HSIL+ | CIN2+<br>cancer |
| <b>25. van Baars 2012</b>       | Self: hrHPV<br>Clin: hrHPV           | SPF10-PCR, PCR (GP5+/6+)                                                                   | Self: Evalyn-Brush<br>Clin: Cervex-Brush                                                             | Self: FTA cartridge<br>Clin: ThinPrep, SurePath                                  | Colposcopy + colpo-directed biopsy<br>- 44 out of 134 women (if histological result was available), for others follow-up cytology<br>- All participants | Not documented                                       | CIN2+<br>CIN3+  |
| <b>26-28. Zhao, 2012</b>        | Self: hrHPV<br>Clin: hrHPV, cytology | hrHPV: HC2<br>Cyto: LBC (ThinPrep)                                                         | Self***: Dacron Swab<br>Clin***: plastic spatula, endocervical brush                                 | Self***: STM<br>Clin***: SurePath for cyto; STM for HPV (see Belinson, IJC 2010) | Colposcopy + colpo-directed or random biopsy (4)<br>- Participants with at least one positive test result                                               | HPV: 1 pg/ml<br>Cyto: ASC-US                         | CIN2+<br>CIN3+  |

| Author, year                            | Tests                                | Assay                                                  | Sampling device                                                                                                   | Storage medium                                             | Golden standard                                                                                                                                           | Test cut-off                       | Outcome        |
|-----------------------------------------|--------------------------------------|--------------------------------------------------------|-------------------------------------------------------------------------------------------------------------------|------------------------------------------------------------|-----------------------------------------------------------------------------------------------------------------------------------------------------------|------------------------------------|----------------|
| <b>29. Darlin, 2013</b>                 | Self: hrHPV<br>Clin: hrHPV           | PCR (GP5+/6+)                                          | Self: coton swab<br>Clin: Cervex-Brush Combi                                                                      | Clin: PreservCyt                                           | Colposcopy + colpo-directed biopsy<br>- All participants                                                                                                  | Not documented                     | CIN2+          |
| <b>30. Geraets, 2013</b>                | Self: hrHPV<br>Clin: hrHPV           | SPF10-PCR,<br>PCR (GP5+/6+)                            | Self: Viba-Brush<br>Clin: Cervex-Brush                                                                            | Self: FTA cartridge<br>Clin: PreservCyt                    | Colposcopy + colpo-directed biopsy<br>- All participants                                                                                                  | Not documented                     | CIN2+<br>CIN3+ |
| <b>31. Guan, 2013</b>                   | Self: hrHPV<br>Clin: hrHPV           | Linear Array                                           | cervical sampler brush                                                                                            | Self + Clin: FTA cartridge                                 | Colposcopy + colpo-directed biopsy<br>- All participants                                                                                                  | Not documented                     | CIN2+          |
| <b>32/33. Jentschke, 2013 a &amp; b</b> | Self: hrHPV<br>Clin: hrHPV, p16      | hrHPV: HC2<br>P16: p16 <sup>INK4a</sup> ELISA          | Self: lavage (Delphi screener)<br>Clin: Not documented                                                            | Self: buffered saline<br>Clin: PreservCyt, Cervatec        | Colposcopy + colpo-directed biopsy<br>- All participants                                                                                                  | Not documented                     | CIN2+<br>CIN3+ |
| <b>34. Nieves, 2013</b>                 | Self: hrHPV<br>Clin: hrHPV, cytology | hrHPV: HC2, APTIMA<br>Cyto: LBC (Thinprep)             | Self: POI/NIH self-sampler<br>Clin: broom sampler                                                                 | Self + Clin: PreservCyt                                    | Colposcopy + colpo-directed cryotherapy or colpo-directed biopsy and/or multiple random biopsies<br>- Participants with at least one positive test result | Cyto: ASCUS<br>HPV: Not documented | CIN2+<br>CIN3+ |
| <b>35. Zhao, 2013</b>                   | Self: hrHPV<br>Clin: hrHPV, E6, VIA  | hrHPV: HC2, <i>careHPV</i> .<br>OncoE6 (only on clin). | Self & clin for cHPV: cone-shaped brush (Cervical Sampler, QIAGEN) <sup>∞</sup> .<br>Clin for E6: polyester swab. | Self & clin for cHPV: CCM.                                 | Colposcopy & targeted and random biopsies if one screen test was positive & 10% random selection of cotest-negative subjects.                             | RLU ≥ 1.0.                         | CIN2+<br>CIN3+ |
| <b>36. Chernesky, 2014</b>              | Self: hrHPV<br>Clin: hrHPV           | APTIMA HPV                                             | Self: tapered round brush, cervix broom<br>Clin: Cervex, APTIMA SCT                                               | Self: APTIMA SCT<br>Clin: PreservCyt, APTIMA SCT, SurePath | Colposcopy on all.<br>Colposcopy targeted biopsy if required.                                                                                             | APTIMA signal: ≥ 0.5               | CIN2+          |

| Author, year                           | Tests                                       | Assay                                                                                        | Sampling device                                                                                                                                       | Storage medium                                                                            | Golden standard                                                                                                                                                                          | Test cut-off                       | Outcome                 |
|----------------------------------------|---------------------------------------------|----------------------------------------------------------------------------------------------|-------------------------------------------------------------------------------------------------------------------------------------------------------|-------------------------------------------------------------------------------------------|------------------------------------------------------------------------------------------------------------------------------------------------------------------------------------------|------------------------------------|-------------------------|
| <b>37. Hesselink, 2014</b>             | Self: hrHPV<br>Clin: hrHPV                  | hrHPV: HPV-Risk Test & GP5+/6+ PCR-EIA.                                                      | Self: Viba-Brush and Delphi Screener.<br>Clin: Cervex                                                                                                 | Self: PreservCyt: Delphi Screener<br>SurePath: Viba-Brush.<br>Clin: Preservcyt, SurePath. | Histology for cases; negative cyto & negative FU (2y) for controls.                                                                                                                      | $C_T < 36$                         | CIN2+                   |
| <b>38-41. Jeronimo, 2014</b>           | Self: hrHPV.<br>Clin: hrHPV, Cytology, VIA. | hrHPV: <i>careHPV</i> cyto: conventional cyto.                                               | Self HPV: cervical brush (digene cervical sampler).<br>Clin HPV: cervical brush (digene cervical sampler).<br>Clin cyto: Ayres spatula <sup>ε</sup> . | Self & clin: Digene collection media.                                                     | Colposcopy if at least one +screen test. Colpo-directed biopsy if colposcopic abnormality & ECC if required for diagnosis. Quality review of all CIN2+ & 10% negative biopsies (random). | HC2: $RLU \geq 1$<br>Cyto: ASC-US+ | CIN2+<br>CIN3+          |
| <b>42. Wang, 2014</b>                  | Self: hrHPV<br>Clin: hrHPV VIA              | hrHPV: <i>careHPV</i>                                                                        | Conical Cervical Sampler                                                                                                                              | DCM<br>FTA card                                                                           | Any positive results on HC2, <i>careHPV</i> , or VIA detection. Colposcopy + colpo-directed biopsy                                                                                       | <i>careHPV</i> : $RLU \geq 1$ .    | CIN2+                   |
| <b>43. Zhang, 2014</b>                 | Self: hrHPV<br>Clin: hrHPV                  | hrHPV: HC2 & LA                                                                              | Not mentioned                                                                                                                                         | Not mentioned                                                                             | Colposcopy + colpo-directed biopsy.<br>To all participants                                                                                                                               | Assumed HC2: $RLU \geq 1$          | CIN2+                   |
| <b>44. Boggan, 2015</b>                | Self: hrHPV<br>Clin: hrHPV                  | hrHPV: HC2                                                                                   | Self: Dacron brush<br>Clin: Dacron brush                                                                                                              | STM                                                                                       | Colposcopy + colpo-directed biopsy, with ECC if SCJ invisible; if HPV+ (on self or clin-samples).                                                                                        | Assumed HC2: $RLU \geq 1$          | CIN1+<br>CIN2+<br>CIN3+ |
| <b>45. Porras, 2015</b>                | Self: hrHPV<br>Clin: hrHPV, cytology        | Self: hrHPV: SPF10 PCR with HPV LiPA2;<br>Clin hrHPV: same PCR, HC2.<br>Cyto: LBC (ThinPrep) | Self: dry Dacron swab<br>Clin: Cervex Brush                                                                                                           | PreservCyt                                                                                | Colposcopy + biopsy: immediate & if subsequent HPV/cyto+ observed up to 4Y at 6M intervals.                                                                                              | $\geq 1$ of 12hrHPV types          | CIN2+                   |
| <b>46. Chen, 2016 (a), Gen Mol Res</b> | Self: hrHPV<br>Clin: hrHPV                  | hrHPV: Cobas-4800, Seq HPV Assay, BMRT HPV Assay                                             | Self and clin: conical brush (Qiagen)                                                                                                                 | Not documented                                                                            | Colposcopy/biopsy, no details on all; gold standard undefined.                                                                                                                           | Not documented                     | CIN2+<br>CIN3+          |

| Author, year                            | Tests                                | Assay                                                                          | Sampling device                                                                                                                                   | Storage medium                                                                                                 | Golden standard                                                                                                                                                                                                                            | Test cut-off                         | Outcome        |
|-----------------------------------------|--------------------------------------|--------------------------------------------------------------------------------|---------------------------------------------------------------------------------------------------------------------------------------------------|----------------------------------------------------------------------------------------------------------------|--------------------------------------------------------------------------------------------------------------------------------------------------------------------------------------------------------------------------------------------|--------------------------------------|----------------|
| <b>47. Chen, 2016 (b), J Ob Gyn Res</b> | Self: hrHPV<br>Clin: hrHPV           | hrHPV: Abbott RealTime hrHPV (PCR)<br>Cyto: LBC                                | Self: Evalyn brush<br>Clin: cervical brush (cyto), Digene Female Swab Specimen Collection Kit (HPV)                                               | Self: Dry for 16-18 W (Evalyn tube), then transferred to ThinPrep before PCR.<br>Clin HPV: STM, then ThinPrep. | Colposcopy with directed or random biopsy on all.                                                                                                                                                                                          | Not documented                       | CIN2+<br>CIN3+ |
| <b>48. Jentschke, 2016</b>              | Self: hrHPV<br>Clin: hrHPV, cytology | hrHPV: Abbott RealTime hrHPV PCR<br>Cyto: LBC (ThinPrep)                       | Self: dry Evalyn Brush and dry Qvintip collection device<br>Clin: broom-like device (Hologic). Order of 2 self-collection devices was alternated. | Dry, then transferred to PreservCyt                                                                            | Colposcopy + colpo-directed biopsy, ECC if indicated. No biopsies taken for unsuspecting colposcopy.                                                                                                                                       | As defined by manufacturer.          | CIN2+<br>CIN3+ |
| <b>49. Qin, 2016</b>                    | Self: hrHPV<br>Clin: hrHPV, cytology | hrHPV: RealTime High-Risk HPV (Abbott <i>m2000rt</i> )<br>Cyto: LBC (ThinPrep) | Self: conical brush (Qiagen)<br>Clin: broom-brush                                                                                                 | Self: FTA Elute card<br>Clin: PreservCyt                                                                       | Colposcopy on all + colpo-directed biopsy from colposcopically suspected lesions.                                                                                                                                                          | HPV: Not documented<br>Cyto: ASC-US+ | CIN2+          |
| <b>50. Stanczuk, 2016</b>               | Self: hrHPV<br>Clin: hrHPV, cytology | hrHPV: Cobas 4800<br>Cyto: LBC (ThinPrep)                                      | Self: Roche female swab sample packet.<br>Clin: Cervex-Brush.                                                                                     | PreservCyt                                                                                                     | Colposcopy and histology:<br>- participants with high-grade abnormalities<br>- participants with 2 low-grade or 3 borderline or 3 unsatisfactory cyto.<br>Follow-up cyto:<br>- borderline changes or low-grade cyto: repeat cyto after 6M. | Ct<40.                               | CIN2+<br>CIN3+ |

| Author, year              | Tests                                 | Assay                                                                          | Sampling device                                                                                                                          | Storage medium                                                                                              | Golden standard                                                                                                                          | Test cut-off                              | Outcome        |
|---------------------------|---------------------------------------|--------------------------------------------------------------------------------|------------------------------------------------------------------------------------------------------------------------------------------|-------------------------------------------------------------------------------------------------------------|------------------------------------------------------------------------------------------------------------------------------------------|-------------------------------------------|----------------|
| <b>51. Aiko, 2017</b>     | Self: hrHPV<br>Clin: hrHPV, cytology  | hrHPV: HC2<br>Cyto: cPap                                                       | Clin: Cytopic device (Matsunami Glass Ind.) for cyto; Digene HC2 DNA Collection Device for HPV.<br>Self: Evalyn Brush                    | Not documented                                                                                              | Colposcopy on all, colposcopy-targeted biopsies & random biopsies if colposcopy normal & satisfactory; ECC if unsatisfactory colposcopy. | Not documented                            | CIN2+<br>CIN3+ |
| <b>52. Asciutto, 2017</b> | Self: hrHPV<br>Clin: hrHPV, cytology. | hrHPV: Cobas 4800<br>Cyto: LBC (ThinPrep)                                      | Self: swab (Cobas® PCR Female Swab Sample Kit).<br>Clin HPV: swab (Cobas® PCR Female Swab Sample Kit).<br>Clin cyto: Cervex Combi Brush. | Self: Cobas PCR Female Swab Sample Kit.<br>Clin HPV: Cobas® PCR Female Swab Sample Kit.<br>LBC: PreservCyt. | Colposcopy on all, biopsies if indicated. If no biopsy, cytology was used as reference.                                                  | According to manufacturer's instructions. | CIN2+          |
| <b>53. Catarino, 2017</b> | Self: hrHPV<br>Clin: hrHPV, cytology. | hrHPV: Xpert HPV; part of clin sample also cobas 4800.<br>Cyto: LBC (ThinPrep) | Self: dry, cotton swab in plastic tube.<br>Clin: Cervex Brush                                                                            | Self: dry, collection transferred to 0.9% NaCl in lab.<br>Clin: PreservCyt.                                 | Colposcopy on all, biopsy with ECC if necessary.                                                                                         | According to manufacturer's instructions. | CIN2+          |
| <b>54. Leeman, 2017</b>   | Self: hrHPV<br>Clin: hrHPV            | hrHPV: SPF10-DEIA-LIPA25 & GP5+/6+-EIA-LMNX                                    | Self: Evalyn Brush<br>Clin: Cervex                                                                                                       | Self: Dry up to 3 months, then placed in vial with PreservCyt for shipment.<br>Clin: PreservCyt.            | All had colposcopy, all had colposcopy targeted biopsies, completed with random biopsies; ECC if unsatisfactory ECC.                     | Not documented.                           | CIN2+<br>CIN3+ |

| Author, year              | Tests                                                 | Assay                                                                       | Sampling device                                                                                 | Storage medium                                                                                                                                                             | Golden standard                                 | Test cut-off                                                        | Outcome |
|---------------------------|-------------------------------------------------------|-----------------------------------------------------------------------------|-------------------------------------------------------------------------------------------------|----------------------------------------------------------------------------------------------------------------------------------------------------------------------------|-------------------------------------------------|---------------------------------------------------------------------|---------|
| <b>55. Asciutto, 2018</b> | Urine: HPV<br>Self: HPV<br>Clin: HPV,<br>LBC cytology | HPV: APTIMA<br>Cyto: ThinPrep                                               | Urine: first void urine<br>Self: APTIMA<br>Vaginal swab<br>Clin: APTIMA<br>Vaginal swab;<br>LBC | Urine:<br>APTIMA urine specimen collection kit.<br>Self: APTIMA vaginal specimen collection kit.<br>Clin; APTIMA vaginal specimen collection kit<br>Clin cyto: PreservCyt. | Depending on colposcopy: punch biopsy or LLETZ. | APTIMA: as defined by manufacturer.<br>Cyto: ASC-US+, LSIL+, HSIL+. | CIN2+   |
| <b>56. Leinonen, 2018</b> | Self: HPV<br>Clin: HPV                                | Self & clin: Anyplex II<br>HPV28; cobas 4800, Xpert HPV.<br>Clin: ThinPrep. | Self: Evalyn<br>Brush & FLOQSwabs;<br>Clin: brush not otherwise specified.                      | Self: dry transport of self-collection devices to lab.<br>Clin: PreservCyt                                                                                                 | Histology of the cone.                          | HPV: as defined by manufacturer.                                    | CIN3+   |

⊕ (30 participants did not undergo colposcopy (likely part of the group of 32 healthy volunteers))

\$ participants with a negative colposcopy, but abnormal cytology or a positive HPV-test, had a second colposcopy + four-quadrant biopsies + endocervical curettage

¥ women who had a positive HC2-test, and a random sample of women with a negative HC2-test or who were CIN2+

\* Retrieved from: Moberg M, Gustavsson I, Gyllensten U. Real-time PCR-based system for simultaneous quantification of human papillomavirus types associated with high risk of cervical cancer. *J Clin Microbiol* 2003; 41(7):3221-3228.

\*\* Retrieved from: Syrjanen K, Naud P, Derchain S, Roteli-Martins C, Longatto-Filho A, Tatti S et al. Comparing PAP smear cytology, aided visual inspection, screening colposcopy, cervicography and hrHPV testing as optional screening tools in Latin America. Study design and baseline data of the LAMS study. *Anticancer Res* 2005; 25(5):3469-3480.

∞ Information obtained from first author.

\*\*\* Retrieved from: Belinson et al, 127, 1151–1157 (2010), for SPOCC-III study.

€ Mentioned in Labani 2014, *Eur J Obstet Gynaecol Reprod Biol* 2014; 176: 75–79.

Abbreviations: ASC-US, Atypical Squamous Cells of Undetermined Significance; CCM: Care Collection Medium; CIN, Cervical Intraepithelial Neoplasia; colpo, colposcopy; cPap, conventional Pap smear; cyto, cytology; DCM: Digene Collection Medium; ECC: endo-cervical curettage; HPV, Human Papillomavirus; LBC, Liquid-Based Cytology; PBS, Phosphate Buffered Saline; STM, Specimen Transport Medium; UCM, Universal Collection Medium.

### 3.3. Used collection devices

**Table 3.** Devices used for self-sampling, grouped in five categories (in black: studies included in the previous meta-analysis, in red studies added).

| Device group          | Device                            | Manufacturer                                                                                                              | Studies                                                                                |
|-----------------------|-----------------------------------|---------------------------------------------------------------------------------------------------------------------------|----------------------------------------------------------------------------------------|
| <b>Brush</b>          | careHPV cervical brush            | Qiagen, Gaithersburg, MD, USA                                                                                             | Jer14                                                                                  |
|                       | Cervical brush                    | -                                                                                                                         | Hol06                                                                                  |
|                       | Conical brush. †                  | Qiagen (previously Digene Corporation), Gaithersburg, MD, USA -                                                           | Bha09, Laz11, Gir06, Bel12, Zha12a, Zha12b, Zha12c, Gua13, Zha13, Che14a, Wan14, Qin16 |
|                       | Cyto-Brush                        | -                                                                                                                         | Hil99, Dap06, Twu11                                                                    |
|                       | Cyto-Brush PLUS                   | Cooper Surgical, Trumbull, CT, USA                                                                                        | Gar03                                                                                  |
|                       | Dacron brush                      | Qiagen, Gaithersburg, MD                                                                                                  | Bog15                                                                                  |
|                       | Evalyn Brush                      | Rovers Medical Devices B.V., Oss, the Netherlands                                                                         | Van12, Che16b, Jen16, Aik17, Lee17                                                     |
|                       | POI self-sampler                  | -                                                                                                                         | Nie13                                                                                  |
|                       | POI/NIH self-sampler              | -                                                                                                                         | Bel12                                                                                  |
|                       | Vaginal brush                     | -                                                                                                                         | Qia08, Dij12                                                                           |
| <b>Lavage</b>         | Viba-Brush                        | Vibabrush: Rovers Medical Devices B.V., Oss, Netherlands<br>FTA cartridge: GE Healthcare, Buckinghamshire, United Kingdom | Gus11, Ger13, Hes14                                                                    |
|                       | <i>Delphi Screener</i>            | Delphi Bioscience, Scherpenzeel, the Netherlands                                                                          | Jen13a, Jen13b, Hes14                                                                  |
|                       | Lavage (15 ml)                    | -                                                                                                                         | Nob02                                                                                  |
|                       | <i>Mermaid</i> (5 ml)             | (previous Delphi Screener)                                                                                                | Bri06                                                                                  |
| <b>Spatula</b>        | <i>MY-PAP</i> (21ml)              | Medtech, Bohemia, NY, USA                                                                                                 | Mor92                                                                                  |
| <b>Swab</b>           | <i>Qvintip</i>                    | AprovixAB, Uppsala, Sweden                                                                                                | Wik11, Jen16                                                                           |
|                       | APTIMA vaginal swab               | Hologic Inc, MA, USA                                                                                                      | Asc18                                                                                  |
|                       | Cobas PCR Female Swab Sample Kit  | Roche Molecular Diagnostics, Pleasanton, CA, USA                                                                          | Asc17, Sta16                                                                           |
|                       | Cotton swab                       | -                                                                                                                         | Lor02, Sza07, Dar13, Cat17                                                             |
|                       | Dacron swab                       | -                                                                                                                         | Sel00, Wri00, Bel01, Sal03, Seo06, Bal10, Tay11, Por15                                 |
| <b>Tampon</b>         | Flocked swab or FLOQSwab (ESwab®) | Copan, Brescia, Italy                                                                                                     | Lei18                                                                                  |
| <b>Tampon</b>         | Tampon                            | -                                                                                                                         | Lon12                                                                                  |
| <b>Not documented</b> | -                                 | -                                                                                                                         | Zha14                                                                                  |

† Also called "*Qiagen/Digene cervical sampler*"



### 3.4. Used media for transport and storage of cervical cell material

**Table 4.** Transport/storage media used (in black: studies included in the previous meta-analysis, in red studies added).

|                                                                            | Author, year          | Medium for self-sample/Recipient if dry collection | Medium used in laboratory            |
|----------------------------------------------------------------------------|-----------------------|----------------------------------------------------|--------------------------------------|
| <b>Transport media which conserve cells for cytological interpretation</b> |                       |                                                    |                                      |
| PreservCyt                                                                 | Garcia, 2003          | PreservCyt                                         |                                      |
|                                                                            | Belinson, 2012        | PreservCyt                                         |                                      |
|                                                                            | Dijkstra, 2012        | PreservCyt                                         |                                      |
|                                                                            | Nieves, 2013          | PreservCyt                                         |                                      |
|                                                                            | Hesselink, 2014       | PreservCyt media with Delphi Screener (lavage)     |                                      |
|                                                                            | Porras, 2015          | PreservCyt                                         |                                      |
| SurePath                                                                   | Brink, 2006           | SurePath                                           |                                      |
|                                                                            | Hesselink, 2014       | SurePath with Viba Brush                           |                                      |
| Citoliq                                                                    | Girianelli, 2006      | Citoliq                                            |                                      |
| <b>Storage media for virology</b>                                          |                       |                                                    |                                      |
| STM*,<br>UCM**,<br>CCM <sup>o</sup> /DCM <sup>o</sup>                      | Sellers, 2000         | STM                                                |                                      |
|                                                                            | Wright, 2000          | STM                                                |                                      |
|                                                                            | Belinson, 2001        | STM                                                |                                      |
|                                                                            | Salmeron, 2003        | STM                                                |                                      |
|                                                                            | Holanda, 2006         | UCM                                                |                                      |
|                                                                            | Qiao, 2008            | Collection medium (QIAGEN)                         |                                      |
|                                                                            | Bhatla, 2009          | STM                                                |                                      |
|                                                                            | Balasubramanian, 2010 | STM                                                |                                      |
|                                                                            |                       |                                                    |                                      |
|                                                                            | Taylor, 2011          | STM                                                |                                      |
|                                                                            | Twu, 2011             | STM                                                |                                      |
|                                                                            | Longatto-Filho, 2012  | STM                                                |                                      |
|                                                                            | Zhao, 2012            | STM                                                |                                      |
|                                                                            | Zhao, 2013            | CCM (=DCM) <sup>B</sup>                            |                                      |
|                                                                            | Jeronimo, 2014        | DCM                                                |                                      |
| Wang, 2014                                                                 | DCM                   |                                                    |                                      |
| Boggan, 2015                                                               | STM                   |                                                    |                                      |
| PBS***,<br>buffered<br>saline                                              | Lorenzato, 2002       | PBS                                                |                                      |
|                                                                            | Nobbenhuis, 2002      | PBS                                                |                                      |
|                                                                            | Daponte, 2006         | PBS                                                |                                      |
|                                                                            | Jentschke, 2013a      | Buffered saline                                    |                                      |
| Cobas                                                                      | Stanczuk, 2016        | Roche PCR media                                    |                                      |
|                                                                            | Asciutto, 2017        | Cobas PCR Female Swab Sample Kit                   |                                      |
| APTIMA                                                                     | Chernesky, 2014       | APTIMA SCT <sup>†</sup>                            |                                      |
|                                                                            | Asciutto, 2018        | Vaginal swab collection kit                        |                                      |
| <b>FTA cartridge</b>                                                       |                       |                                                    |                                      |
|                                                                            | Gustavsson, 2011      | FTA cartridge                                      | Distilled water                      |
|                                                                            | Geraets, 2013         | FTA cartridge                                      | Distilled water                      |
|                                                                            | Guan, 2013            | FTA cartridge                                      | DEPC water                           |
|                                                                            | Wang, 2014            | FTA card                                           | Sterile water                        |
|                                                                            | Qin, 2016             | FTA                                                | DEPC <sup>v</sup> water              |
| <b>Dry transport</b>                                                       |                       |                                                    |                                      |
|                                                                            | Hillemanns, 1999      | Placed into a specimen collection tube             | Not documented                       |
|                                                                            | van Baars 2012        | Capped Evalyn case                                 | PreservCyt                           |
|                                                                            | Darlin, 2013          | Sterile cryotube                                   | Not documented                       |
|                                                                            | Chen, 2016 (b)        | Dry for 16-18 weeks (Evalyn tube)                  | Transferred to PreservCyt before PCR |

|                                      | Author, year     | Medium for self-sample/Recipient if dry collection | Medium used in laboratory        |
|--------------------------------------|------------------|----------------------------------------------------|----------------------------------|
|                                      | Jentschke, 2016  | Evalyn tube<br>Qvintip tube                        | PreservCyt<br>Preservcyt         |
|                                      | Catarino, 2017   | Plastic tube                                       | Transferred to 0.9% NaCl in lab. |
|                                      | Leeman, 2017     | Evalyn Tube (dry collection)                       | PreservCyt                       |
|                                      | Leinonen, 2018   | Evalyn Tube & FLOQSwab                             | PreservCyt                       |
| <b>Other (cannot be categorized)</b> |                  |                                                    |                                  |
|                                      | Morrison, 1992   | Ethanol carbowax                                   |                                  |
|                                      | Jentschke, 2013b | Cervatec <sup>†</sup>                              |                                  |
| <b>Not documented</b>                |                  |                                                    |                                  |
|                                      | Seo, 2006        | Not documented                                     |                                  |
|                                      | Szarewski, 2007  | Not documented                                     |                                  |
|                                      | Wikstrom, 2011   | Not documented                                     |                                  |
|                                      | Zhang, 2014      | Not documented                                     |                                  |
|                                      | Chen, 2016 (a)   | Not documented                                     |                                  |
|                                      | Aiko, 2017       | Not documented                                     |                                  |

\*STM, Specimen Transport Medium; \*\*UCM, Universal Collection Medium; \*\*\*PBS, Phosphate-buffered saline; <sup>o</sup>CCM, collection care medium; <sup>o</sup>DCM, Digene Care Medium; <sup>B</sup>Extracted from Belinson, IJC 2010; <sup>v</sup>Diethyl Pyrocarbonate; <sup>†</sup>APTIMA SCT = APTIMA specimen collection and transportation kit.

*A. Transport media which conserve cells for cytological interpretation*

1. ThinPrep=PreservCyt
2. SurePath=AutoCyte
3. Citoliq

*B. Storage media for virology*

1. STM (specimen transport medium), UCM (universal transport medium), CCM (collection care medium), DCM (Digene care medium), Collection medium (QIAGEN)
2. PBS, buffered saline
3. Cobas, Cobas PCR Female Swab Sample Kit

*C. Other*

1. Ethanol carbowax
2. Cervatec<sup>†</sup>
3. APTIMA SCT (specimen collection and transportation kit)

*D. Dry transport*

*E. FTA cartridge/card*

### 3.5. Used hrHPV tests

**Table 5.** Used tests (abbreviations, manufacturer and study in which the tests were applied).

| Abbreviation         | Test                                                                                                                                                    | Manufacturer                                       | Studies                                                                   |
|----------------------|---------------------------------------------------------------------------------------------------------------------------------------------------------|----------------------------------------------------|---------------------------------------------------------------------------|
| AB                   | Abbott RT PCR hrHPV<br><br>(Multiplex real-time PCR test that targets the (GP5+/6+) <i>L1 region</i> of 14 hrHPV types PCR)                             | Abbott Molecular, Inc., Des Plaines, IL, USA       | Jen13b, <b>Che16b</b> , Jen16, <b>Qin16</b>                               |
| <b>Anyplex HPV28</b> | <b>Anyplex II HPV28 (multiplex rtPCR targeting L1 of 28 HPV types with separated identification)</b>                                                    | <b>Seegene, Seoul, South Korea</b>                 | <b>Lei18</b>                                                              |
| APTI                 | APTIMA<br>(A multiplex <i>in vitro</i> nucleic acid amplification test targeting <i>E6/E7</i> mRNA from 14 hrHPV types)                                 | Gen-Probe Inc., San Diego, CA, USA                 | Nie13, <b>Che14</b> , <b>Asc18</b>                                        |
| <b>BMRT</b>          | <b>BMRT HPV PCR test</b>                                                                                                                                | <b>BioPerfectus Technologies, Taizhou, China</b>   | <b>Che16a</b>                                                             |
| cHPV                 | careHPV<br>(A signal amplification method (simplified HC2) targeting 14 hrHPV types) [0.5]: cutoff at RLU>0.5 [1]: cutoff at RLU>1. Point-of-care test. | QIAGEN Corporation, Gaithersburg, MD, USA          | <b>Qia08</b> , <b>Zha13</b> , <b>Jer14</b> , <b>Wan14</b>                 |
| <b>cobas 4800</b>    | <b>cobas 4800 HPV test (Target amplification by RT PCR using PGMY consensus primers, identifying, HPV16, HPV18 and 12 other hrHPV types)</b>            | <b>Roche Molecular System, Pleasanton, CF, USA</b> | <b>Che16a</b> , <b>Sta16</b> , <b>Asc17</b> , <b>Lei18</b>                |
| Cvsta                | Cervista<br>(A signal amplification method by Invader chemistry using 3 oligonucleotide mixtures, together targeting 14 hrHPV types)                    | Hologic, Bedford, MA, USA                          | Bel12                                                                     |
| DNAch                | DNAchip<br>(A broad spectrum PCR based on GP5+/6+PCR targeting the <i>L1 region</i> to detect and genotype 15 hrHPVs and 9 lrHPVs)                      | Biomedlab Co., Seoul, Korea                        | Seo06                                                                     |
| <b>GP5+/6+-EIA</b>   | <b>PCR with GP5+/6+ primers with EIA recognition of amplicons hybridized with 14 oligo-nucleotids.</b>                                                  | <b>Diassy, Rijswijk, the Netherlands</b>           | <b>Bri06</b> , <b>Dij12</b> , <b>VBaa12</b> , <b>Ger13</b> , <b>Lee17</b> |
| <b>GP5+/6+-LMNX</b>  | modified GP5+/6+ with Luminex read-out targeting the <i>L1 region</i> of hr- and lr HPV(s)                                                              | <b>Diassy, Rijswijk, the Netherlands</b>           | <b>Dar13</b> , <b>Lee17</b>                                               |

| Abbreviation | Test                                                                                                                  | Manufacturer                                 | Studies                                                                                                                                                                                          |
|--------------|-----------------------------------------------------------------------------------------------------------------------|----------------------------------------------|--------------------------------------------------------------------------------------------------------------------------------------------------------------------------------------------------|
| HC2          | Hybrid Capture-2<br>(A signal amplification method targeting 13 hrHPV types)                                          | Qiagen Corporation,<br>Gaithersburg, MD, USA | Hil99, Sel00, Wri00, Bel01, Sal03, Gir06, Hol06, Sza07, Bha09, Bal10, Laz11, Tay11, Wik11, Lon12, Zha12a, Zha12b, Zha12c, Jen13a, Jen13b, Nie13, Zha13, Zha14, Bog15, Por15 <sup>†</sup> , Aik17 |
| LBC-TP       | Liquid-Based Cytology (ThinPrep)                                                                                      | Cytec Corporation,<br>Boxborough, MA, USA    | Gar03, Bri06                                                                                                                                                                                     |
| LIPA25       | SPF10-DEIA-LIPA                                                                                                       | DDL, Voorburg, the Netherlands               | vBa12, Ger13, Por15, Lee17                                                                                                                                                                       |
| M-TOF        | MALDI-TOF (GP5+/6+ based PCR with MALDI-TOF read out to detect <i>L1 region</i> )                                     | AB SCIEX, Foster City, CA, USA               | Bel12                                                                                                                                                                                            |
| NGS          | Next Generation Sequencing.<br>• SeqHPV assay                                                                         | • BGI Shenzhen, China                        | Che16a                                                                                                                                                                                           |
| PCR other    | Non-commercial PCR using primers, other than GP5+/6+:                                                                 |                                              |                                                                                                                                                                                                  |
|              | MY9/11 ( <i>L1 region</i> )                                                                                           |                                              | Mor92, Lor02,                                                                                                                                                                                    |
|              | PGMY9/11 ( <i>L1 region</i> )                                                                                         |                                              | Gar03, Bha09                                                                                                                                                                                     |
| LA           | Linear Array (PGMY09/11 L1 consensus primer PCR test that identifies 37 HPV types by reverse line blot hybridization) | Roche MolecularSystems, Alameda, CA, USA     | Gua13, Zha14                                                                                                                                                                                     |
| HPV Risk     | Multiplex real-time PCR targeting a ~150-bp fragment of the E7 gene of 15 hrHPV types.                                | selfScreen, Amsterdam, the Netherlands       | Hes14                                                                                                                                                                                            |
| Xpert HPV    | Cartridge-based RT PCR targeting E6/7 genes of 14 hrHPV types. Point-of-care test.                                    | Cepheid, Sunnyvale, CA, USA                  | Cat17, Lei18                                                                                                                                                                                     |

† Only on clinician-taken sample.

The following hrHPV tests, assessed in the meta-analysis are considered as clinically validated for cervical cancer screening on clinician samples <sup>6</sup>.

- a) Based on signal amplification: Hybrid Capture, Cervista.
- b) Based on target amplification by polymerase chain reaction (PCR): GP5+/5+ PCR-EIA, Abbott RT PCR hrHPV, Anyplex II HR<sup>7</sup>, cobas 4800 HPV test, GP5+/6+-LMNX, Linear Array<sup>8</sup>, HPV Risk assay, Xpert HPV<sup>9</sup>.

## 4. Characteristics of the randomized trials comparing strategies including offering self-samples with control interventions

**Table 6.** Study characteristics of included RCTs fulfilling eligibility criteria.

| Author, year<br>Country                 | Study design and population                                                                                                                                                                                                     | Scenario of invitation<br>in self-sampling arm                                                                                                                                                                                                  | Scenario of invitation<br>in control arm                                                                                                   | N (Self-<br>sampling<br>arm) | N<br>(Control<br>arm) | Age<br>range<br>(years) |
|-----------------------------------------|---------------------------------------------------------------------------------------------------------------------------------------------------------------------------------------------------------------------------------|-------------------------------------------------------------------------------------------------------------------------------------------------------------------------------------------------------------------------------------------------|--------------------------------------------------------------------------------------------------------------------------------------------|------------------------------|-----------------------|-------------------------|
| <b>1. Bais, 2007</b><br>The Netherlands | Randomized.<br>Women who did not respond to the invitation for conventional screening and the first reminder 6 months later. No data on response stratified by screening history.                                               | Direct mailing of the self-sampling kit.*                                                                                                                                                                                                       | Invitation for conventional cytology with an explanatory letter.*                                                                          | 2,352                        | 272                   | 30-50                   |
| <b>2. Gok, 2010</b><br>The Netherlands  | Randomized.<br>Women who did not respond to the invitation for conventional screening and the first reminder 6 months later. Whole population: 1 <sup>st</sup> screen or screened 5 years ago. Subgroup: screened >7 years ago. | Direct mailing of the self-sampling kit, preceded by a notification.*                                                                                                                                                                           | Invitation for conventional cytology, preceded by a notification.*                                                                         | 26,886                       | 277                   | 30-60                   |
| <b>3. Giorgi-Rossi, 2011</b><br>Italy   | Randomized.<br>Women who did not respond to the invitation for conventional screening. No sufficient data on response stratified by screening history.                                                                          | - Direct mailing of the self-sampling kit, preceded by a notification.<br>- Women were offered the opportunity to receive the self-sampler device (by mail or picking it up at the clinic). If interested, they had to call a free toll number. | - Invitation for conventional cytology (prefixed date).<br>- Invitation for hrHPV testing at the clinic (sample collected by a clinician). | - 616<br><br>- 622           | - 619<br><br>- 616    | 35-65                   |
| <b>4. Lazcano-Ponce, 2011</b><br>Mexico | Randomized.<br>Women in poverty-reduction programme, with limited access to health services. No data on response stratified by screening history.                                                                               | Door-to-door recruitment. Nurses performed home visits, in which a self-sample was taken by the woman herself.                                                                                                                                  | Door-to-door recruitment. Nurses performed home visits, and made an appointment for conventional cytology in the clinic.                   | 9,371                        | 1,2731                | 25-65                   |

| <b>Author, year</b><br>Country              | <b>Study design and population</b>                                                                                                                                                                      | <b>Scenario of invitation in self-sampling arm</b>                                                                              | <b>Scenario of invitation in control arm</b>                                                     | <b>N (Self-sampling arm)</b> | <b>N (Control arm)</b> | <b>Age range (years)</b> |
|---------------------------------------------|---------------------------------------------------------------------------------------------------------------------------------------------------------------------------------------------------------|---------------------------------------------------------------------------------------------------------------------------------|--------------------------------------------------------------------------------------------------|------------------------------|------------------------|--------------------------|
| <b>5. Piana, 2011</b><br>France             | Randomized.<br>Women who did not respond to the invitation for conventional screening and had not had a cervical smear in $\geq 2$ y.<br>No sufficient data on response stratified by screening history | Direct mailing of the self-sampling kit, preceded by a notification with an opt-out option.                                     | Invitation for conventional cytology.                                                            | 4,400                        | 4,934                  | 35-69                    |
| <b>6. Szarewski, 2011</b><br>United Kingdom | Randomized.<br>Women who did not respond to $\geq 2$ invitations for conventional screening.<br>No data on response stratified by screening history                                                     | Direct mailing of the self-sampling kit. <sup>¥</sup>                                                                           | Invitation for conventional cytology. <sup>¥</sup>                                               | 1,500                        | 1,500                  | 25-64                    |
| <b>7. Virtanen, 2011</b><br>Finland         | Randomized.<br>Women who did not respond to the invitation for conventional screening.<br>No sufficient data on response stratified by screening history.                                               | Direct mailing of the self-sampling kit, preceded by a notification (with an opt-out option).                                   | Invitation for conventional cytology (pre-fixed appointment).                                    | 2,397                        | 6,302                  | 30-60                    |
| <b>8. Wikstrom, 2011</b><br>Sweden          | Randomized.<br>Women who had not participated in screening for $\geq 6$ years.<br>No data on response stratified by screening history.                                                                  | Direct mailing of the self-sampling kit, preceded by a notification. Afterwards an additional reminder to participate was sent. | Invitation for conventional cytology, within the framework of the organised screening programme. | 2,000                        | 2,060                  | 39-60                    |
| <b>9. Gok, 2012</b><br>The Netherlands      | Randomized.<br>Women who did not respond to the invitation for conventional screening and the first reminder.<br>No data on response stratified by screening history.                                   | Direct mailing of the self-sampling kit, preceded by a notification.*                                                           | Invitation for conventional cytology, preceded by a notification.*                               | 25,561                       | 261                    | 30-60                    |

| Author, year<br>Country                   | Study design and population                                                                                                                                                                                                                                                                                    | Scenario of invitation<br>in self-sampling arm                                                                                                                                                                                                                         | Scenario of invitation<br>in control arm                                                                                                               | N (Self-<br>sampling<br>arm) | N<br>(Control<br>arm) | Age<br>range<br>(years) |
|-------------------------------------------|----------------------------------------------------------------------------------------------------------------------------------------------------------------------------------------------------------------------------------------------------------------------------------------------------------------|------------------------------------------------------------------------------------------------------------------------------------------------------------------------------------------------------------------------------------------------------------------------|--------------------------------------------------------------------------------------------------------------------------------------------------------|------------------------------|-----------------------|-------------------------|
| <b>10. Darlin, 2013</b><br>Sweden         | Randomized.<br>Women who had not had any cervical smears taken for >9y.<br>No data on response stratified by screening history.                                                                                                                                                                                | Direct mailing of the self-sampling kit. After one month, a reminder including another self-sampling kit was sent to non-responders.                                                                                                                                   | Invitation for hrHPV testing at an outpatient clinic. The invitation included several alternative appointments. A reminder was sent to non-responders. | 1,000                        | 500                   | 32-65                   |
| <b>11. Sancho-Garnier, 2013</b><br>France | Randomized.<br>Women who did not respond to the invitation for conventional screening and had not had a cervical smear in $\geq 2$ y.<br>No data on response stratified by screening history.                                                                                                                  | Direct mailing of the self-sampling kit, preceded by a notification.                                                                                                                                                                                                   | Invitation for conventional cytology at an outpatient clinic. The invitation included a list of centers performing the test.                           | 8,829                        | 9,901                 | 35-69                   |
| <b>12. Broberg, 2014</b><br>Sweden        | Randomized.<br>Women who did not respond to $\geq 4$ invitations for conventional screening and did not have a registered Pap smear for $\geq 6$ y (30-53y), $\geq 7$ y (54y), or $\geq 8$ y (55-62y).<br>Data on response stratified by screening history: screened $\leq 10$ or $>10$ y ago; never screened. | Women were offered the opportunity to receive a self-sampling kit (by mail). If interested, they had to return a coupon using a postage-free envelope.<br>A reminder was sent if the kit was ordered but not returned, or after 10 weeks to women who did not respond. | No particular intervention was done. Women continued to receive annual invitations until a smear was registered.                                       | 800                          | 4,000                 | 30-62                   |
| <b>13. Haguenoer, 2014</b><br>France      | Randomized.<br>Women who had not had a cervical smear in $\geq 3$ y, and did not respond to the invitation for conventional screening.<br>No data on response stratified by screening history.                                                                                                                 | Direct mailing of the self-sampling kit.                                                                                                                                                                                                                               | - Invitation for conventional cytology.<br>- No intervention.                                                                                          | 1,999                        | - 2,000<br>- 1,999    | 30-65                   |

| Author, year<br>Country                   | Study design and population                                                                                                                                                                                                             | Scenario of invitation<br>in self-sampling arm                                                                                                                            | Scenario of invitation<br>in control arm                                                                                                                                                        | N (Self-<br>sampling<br>arm) | N<br>(Control<br>arm) | Age<br>range<br>(years) |
|-------------------------------------------|-----------------------------------------------------------------------------------------------------------------------------------------------------------------------------------------------------------------------------------------|---------------------------------------------------------------------------------------------------------------------------------------------------------------------------|-------------------------------------------------------------------------------------------------------------------------------------------------------------------------------------------------|------------------------------|-----------------------|-------------------------|
| <b>14. Arrossi, 2015</b><br>Argentina     | Cluster randomized.<br>Women found at home.<br>No data on response stratified by<br>screening history.                                                                                                                                  | Door-to-door recruitment.<br>Community health workers<br>performed home visits, in<br>which a self-sample was<br>taken by the woman herself.                              | Door-to-door<br>recruitment. Community<br>health workers<br>performed home visits<br>and advised women to go<br>to a health centre for a<br>clinician-collected<br>sample for hrHPV<br>testing. | 3,049                        | 4,018                 | ≥30                     |
| <b>15. Cadman, 2015</b><br>United Kingdom | Randomized.<br>Women who did not respond to the<br>invitation for conventional screening<br>and the first reminder.<br>Data on response stratified by<br>screening history: screened 0-3y, 3-5y,<br>5-10y and >10y ago; never screened. | Direct mailing of the self-<br>sampling kit.                                                                                                                              | Invitation for<br>conventional cytology.                                                                                                                                                        | 3,000                        | 3,000                 | 25-65                   |
| <b>16. Giorgi-Rossi, 2015</b><br>Italy    | Randomized.<br>Women who did not respond to the<br>invitation for conventional screening.<br>No data on response stratified by<br>screening history.                                                                                    | - Direct mailing of the self-<br>sampling kit, preceded by a<br>notification.<br>- Women were invited by<br>mail, to pick up a self-<br>sampling device at the<br>clinic. | - Invitation for<br>conventional cytology at<br>the clinic.<br>- Invitation for hrHPV<br>testing at the clinic<br>(sample collected by a<br>clinician).                                         | - 4,516<br>- 4,513           | - 1,998<br>- 3,014    | 30-64                   |
| <b>17. Moses, 2015</b><br>Uganda          | RCT.<br>Women who lived or worked in target<br>city and had access to a mobile<br>telephone. Door-to-door recruitment.<br>No data on response stratified by<br>screening history.                                                       | Women were provided<br>samples at place of<br>recruitment and returned<br>them to outreach workers.                                                                       | Women were scheduled for VIA<br>appointment and received a<br>reminder call.                                                                                                                    | 248                          | 245                   | 30-65                   |



| Author, year<br>Country               | Study design and population                                                                                                                                                                                                                                                                                                                                                      | Scenario of invitation<br>in self-sampling arm                                                                                                | Scenario of invitation<br>in control arm                                                                           | N (Self-<br>sampling<br>arm)                                  | N<br>(Control<br>arm)                                        | Age<br>range<br>(years) |
|---------------------------------------|----------------------------------------------------------------------------------------------------------------------------------------------------------------------------------------------------------------------------------------------------------------------------------------------------------------------------------------------------------------------------------|-----------------------------------------------------------------------------------------------------------------------------------------------|--------------------------------------------------------------------------------------------------------------------|---------------------------------------------------------------|--------------------------------------------------------------|-------------------------|
| <b>18. Enerly, 2016</b><br>Norway     | Cohort study with random selection of women who did not have cytology, hrHPV or histology in more than 3 years. Targeted women attended information sessions.<br>No data on response stratified by screening history.                                                                                                                                                            | Direct mailing of the self-sampling kit, preceded by a notification with an opt-out option.                                                   | Invitation (i.e., reminder) to complete liquid-based cytology sent to women not included in intervention group.    | 800                                                           | 2,593                                                        | 26-69                   |
| <b>19. Racey, 2016</b><br>Canada      | RCT.<br>Women with current Ontario Health Insurance Program card and no cytology in $\geq 30$ months.<br>No data on response stratified by screening history.                                                                                                                                                                                                                    | Direct mailing of a self-sampling kit, preceded by a notification with choice to opt-out. Reminder phone call 1 month after kits were mailed. | C1: Invitation letter to schedule cytology appointment with primary<br>C2: No invitation (opportunistic screening) | 335                                                           | C1: 331<br>C2: 152                                           | 30-70                   |
| <b>20. Sultana, 2016</b><br>Australia | RCT.<br>Never-screened or under-screened women (not screened in the previous 2.5 years).<br>Data on response stratified by screening history: screened >2.5y ago; never screened.                                                                                                                                                                                                | Direct mailing of a self-sampling kit, preceded by a notification with an opt-out option.                                                     | Invitation (never-screened) or reminder (underscreened) letters for cytology.                                      | 14,153=<br>7,075 un-<br>screened;<br>7,078 under-<br>screened | 2,025=<br>1,014 un-<br>screened;<br>1,011 under-<br>screened | 30-69                   |
| <b>21. Zehbe, 2016</b><br>Canada      | Cluster-RCT.<br>Women from one of 11 community clusters ("bands"), First Nations communities (N-Canada).<br>Community assistants set up contacts and information & promotion activities (Community assistants recruited at community events, radio, door-to-door, mail, band office, and health office networks).<br>No clear data on response stratified by screening history.. | - Arm A: Self-sampling offered in phase 1.<br>- Arm B: Self-sampling offered in phase 2.                                                      | - Arm B: Pap smear collection offered in phase 1.<br>- Arm A: Pap smear collection offered in phase 2.             | 404 (6<br>clusters)                                           | 430 (4<br>clusters)                                          | 25-69                   |

| Author, year<br>Country                      | Study design and population                                                                                                                                                                                                                                                                                                                                                                | Scenario of invitation<br>in self-sampling arm                                                                                                                                                                                                                    | Scenario of invitation<br>in control arm                                                                                          | N (Self-<br>sampling<br>arm)                                            | N<br>(Control<br>arm)                          | Age<br>range<br>(years)        |
|----------------------------------------------|--------------------------------------------------------------------------------------------------------------------------------------------------------------------------------------------------------------------------------------------------------------------------------------------------------------------------------------------------------------------------------------------|-------------------------------------------------------------------------------------------------------------------------------------------------------------------------------------------------------------------------------------------------------------------|-----------------------------------------------------------------------------------------------------------------------------------|-------------------------------------------------------------------------|------------------------------------------------|--------------------------------|
| <b>22. Kitchener, 2017</b><br>United Kingdom | Cluster-randomized. Phase 2 of STRATEGIC trial.<br>Women, due for their first invitation, who in phase 1 of STRATEGIC who did not respond to invitation letters (with or without pre-leaflet or with/without online booking) to screening after 6 months.                                                                                                                                  | - A) Direct mailing of unrequested self-sampling kits<br>- B) Direct mailing of requested self-sampling kits<br>- C) Offered women choice between nurse navigator and self-sampling kit (not considered for syst. rev)                                            | No intervention beyond standard invitation.                                                                                       | - A) SS to all: 1,141 (32 GPs)<br><br>- B) SS requested: 1,290 (66 GPs) | 3,782 (101 GPs)                                | 20 (Grampian); 25 (Manchester) |
| <b>23. Modibbo, 2017</b><br>Nigeria          | RCT.<br>Women living or working in target community not planning to move within 6 months.<br>No data on response stratified by screening history.                                                                                                                                                                                                                                          | Women attending a community event were given self-sampling kits to complete at home and to mail or drop them off at collection sites.                                                                                                                             | Women attending a community event were given hospital hrHPV test appointment.                                                     | 200                                                                     | 200                                            | ≥30                            |
| <b>24. Kellen, 2018</b><br>Belgium           | RCT. Population-based RCT with 2 experimental arms and 2 controls arms, including women without screening record since 8 years.<br>No data on response stratified by screening history.                                                                                                                                                                                                    | 1) Reminder mailing with self-sampling kit (mail-to-all);<br>2) Reminder mailing with self-sampling to be ordered (opt-in).                                                                                                                                       | 1) Reminder mailing inviting women to have a cytology specimen taken by a clinician (=routine intervention).<br>2) No invitation. | Mail-to-all: 9,118.<br>Opt-in: 9,098.                                   | Reminder letter: 8,830.<br>No reminder: 8,849. | 30-64                          |
| <b>25. Tranberg, 2018</b><br>Denmark         | Population-based RCT with 1 control arm and 2 experimental arms (mail-to-all & opt-in) including women who did not reply to a 1 <sup>st</sup> invitation and were due to a 2 <sup>nd</sup> reminder. Nested in Danish screening programme.<br>Response rates stratified for regularly screened, under-screened and never screened subgroups. See <a href="#">Table 16</a> for definitions. | 1) Reminder mailing with self-sampling kit;<br>2) Reminder mailing with self-sampling to be ordered (opt-in).<br>Women were also offered the possibility to contact a GP for collection of cyto specimen.<br>For both arms: reminder letter if response after 4m. | Reminder mailing inviting women to have a cytology specimen taken by a clinician.                                                 | Mail-to-all: 3,265.<br>Opt-in: 3,264.                                   | 3,262                                          | 30-64                          |

\* A telephone helpline and/or website with information was available throughout the study.

‡ Study information was available in different languages as hard copy and on the internet.

Abbreviations: GP: general practitioner; HPV: human papillomavirus; RCT: randomized controlled trial; SS: self-sampling; VIA: visual inspection with acetic acid.

**Table 7.** Test, triage & follow-up characteristics of RCTs fulfilling eligibility criteria.

| Author, year                  | Tests         | Self-sampling device          | Time of response assessment (months after invitation) | Triage of test+                                    | Follow-up                                                                                                                                                                                                                                          |
|-------------------------------|---------------|-------------------------------|-------------------------------------------------------|----------------------------------------------------|----------------------------------------------------------------------------------------------------------------------------------------------------------------------------------------------------------------------------------------------------|
| <b>1. Bais, 2007</b>          | PCR (GP5+/6+) | Cervicovaginal brush          | 6m                                                    | No triage                                          | ▪ Cytology + colposcopy + colpo-directed biopsy, in case of positive screen-test                                                                                                                                                                   |
| <b>2. Gök, 2010</b>           | HC2           | Lavage (Delphi screener)      | 12m                                                   | Self-arm: cytology + repeat HPV                    | ▪ Colposcopy + colpo-directed biopsy, in case of ASC-US+<br>▪ Repeat testing (Pap + hrHPV) in 1y, in case of normal cytology or no cytology performed                                                                                              |
| <b>3. Giorgi-Rossi, 2011</b>  | HC2           | Lavage                        | 3m                                                    | No triage                                          | ▪ Colposcopy + colpo-directed biopsy, in case of screen test+ and positive colposcopy<br>▪ Colposcopy + cytology in 1y, in case of screen test+ and negative colposcopy                                                                            |
| <b>4. Lazcano-Ponce, 2011</b> | HC2           | Cervicovaginal brush (Digene) | ND                                                    | No triage                                          | ▪ Colposcopy (free of charge) + colpo-directed biopsy, in case of screen test+                                                                                                                                                                     |
| <b>5. Piana, 2011</b>         | PCR           | Not documented                | ND                                                    | No triage                                          | ▪ Cytology and colposcopy + colpo-directed biopsy                                                                                                                                                                                                  |
| <b>6. Szarewski, 2011</b>     | HC2           | Swab                          | 6m                                                    | Cytology                                           | ▪ Colposcopy + colpo-directed biopsy, in case of triage test+ (or triage test-, by choice) (self-sampling arm) or screening test+ (control arm).                                                                                                   |
| <b>7. Virtanen, 2011</b>      | HC2           | Lavage (Delphi screener)      | ND                                                    | - <40y: cytology + repeat HPV<br>- ≥40y: no triage | ▪ <40y: Colposcopy + colpo-directed biopsy, in case of at least one positive triage test. Repeat testing (cytology + hrHPV) in 1y, in case of normal triage test.<br>▪ ≥40y: colposcopy + colpo-directed biopsy, in case of a positive screen test |
| <b>8. Wikström, 2011</b>      | HC2           | Swab                          | 12m                                                   | No triage                                          | ▪ Self-arm: Colposcopy + biopsy; or cytology (with/without repeat hrHPV)<br>▪ Control arm: Colposcopy + biopsy, in case of HSIL+; repeat cytology in case of ASC-US or LSIL                                                                        |
| <b>9. Gök, 2012</b>           | HC2           | Cervicovaginal brush          | 12m                                                   | Cytology                                           | ▪ Colposcopy + colpo-directed biopsy, in case of ASC-US+<br>▪ Repeat testing (Pap + hrHPV) in 1y, in case of normal cytology                                                                                                                       |
| <b>10. Darlin, 2013</b>       | PCR (GP5+/6+) | Not documented                | ND                                                    | No triage                                          | ▪ Colposcopy + colpo-directed biopsy and LBC, in case of hrHPV.                                                                                                                                                                                    |

| Author, year                    | Tests                          | Self-sampling device                                 | Time of response assessment (months after invitation) | Triage of test+                                                                                | Follow-up                                                                                                                                                                                                                                                                                                                                  |
|---------------------------------|--------------------------------|------------------------------------------------------|-------------------------------------------------------|------------------------------------------------------------------------------------------------|--------------------------------------------------------------------------------------------------------------------------------------------------------------------------------------------------------------------------------------------------------------------------------------------------------------------------------------------|
| <b>11. Sancho-Garnier, 2013</b> | Abbott RT PCR                  | Swab (Dacron)                                        | ND                                                    | Cytology                                                                                       | ▪ Colposcopy + colpo-directed biopsy, in case of LSIL+                                                                                                                                                                                                                                                                                     |
| <b>12. Broberg, 2014</b>        | HC2                            | Plastic swab (QvinTip)                               | ND                                                    | No triage                                                                                      | ▪ Colposcopy + colpo-directed biopsy, in case of hrHPV-positivity and/or abnormal cytology.                                                                                                                                                                                                                                                |
| <b>13. Haguenoer, 2014</b>      | INNO-LiPa                      | Dry nylon flocked swab.                              | 9m<br>12m                                             | Cytology                                                                                       | ▪ Colposcopy + colpo-directed biopsy in case of ASC-US+                                                                                                                                                                                                                                                                                    |
| <b>14. Arrossi, 2015</b>        | HC2                            | Cervical brush (Qiagen)                              | 6m                                                    | Self: no triage<br>Control: cytology                                                           | ▪ Colposcopy + colpo-directed biopsy, in case of hrHPV-positivity (self-sampling arm) or in case of hrHPV-positivity and ASC-US+ (control arm).                                                                                                                                                                                            |
| <b>15. Cadman, 2015</b>         | HC2                            | Dacron Swab                                          | 3m                                                    | Cytology                                                                                       | ▪ Colposcopy + colpo-directed biopsy, in case of abnormal cytology.                                                                                                                                                                                                                                                                        |
| <b>16. Giorgi-Rossi, 2015</b>   | HC2                            | Lavage (Delphi screener)                             | 3m                                                    | Primary HPV: cytology (3/6 study centers), or no triage (3/6).<br>Primary cytology: no triage. | ▪ Colposcopy + colpo-directed biopsy in case of ASC-US+ (cytology triage, or primary cytology). Repeat HPV in case of normal cytology.<br>▪ Cytology, and colposcopy + colpo-directed biopsy in case of hrHPV+ (no triage). Repeat double testing in 3-6 months in case of normal colposcopy and HSIL, otherwise repeat testing in 1 year. |
| <b>17. Enerly, 2016</b>         | CLART HPV2 test, HC2           | Lavage (Delphi screener) / Evalyn brush (randomized) | ND                                                    | Self arm: cytology or hrHPV testing<br>Control arm: cytology                                   | For women with hrHPV-positive result on self-sample: scheduled appointment for collection of a cervical specimen that was co-tested (cytology & hr HPV).                                                                                                                                                                                   |
| <b>18. Moses, 2016</b>          | Ecoli s.r.o real-time PCR test | Dracon swab                                          | ND                                                    | VIA                                                                                            | ▪ Self-test arm: Cryotherapy at VIA appointment, or colposcopy with treatment when indicated.<br>▪ VIA arm: Cryotherapy at the time of screening. Colposcopy and treatment referral when lesions were not appropriate for cryotherapy or when VIA was unsatisfactory.                                                                      |

| Author, year               | Tests                                                                         | Self-sampling device                      | Time of response assessment (months after invitation) | Triage of test+                                                            | Follow-up                                                                                                                                                          |
|----------------------------|-------------------------------------------------------------------------------|-------------------------------------------|-------------------------------------------------------|----------------------------------------------------------------------------|--------------------------------------------------------------------------------------------------------------------------------------------------------------------|
| <b>19. Racey, 2016</b>     | NML Luminex (linear array)                                                    | Dracon swab                               | ND                                                    | Cytology                                                                   | Standard of care                                                                                                                                                   |
| <b>20. Sultana, 2016</b>   | Cobas 4800                                                                    | Nylon-tipped flocced swab                 | 6m                                                    | HPV 16/18: No triage (directly to colposcopy)<br>HPV other types: Cytology | Colposcopy with biopsy                                                                                                                                             |
| <b>21. Zebhe, 2016</b>     | Cobas 4800                                                                    | Dracon swab                               | 3m                                                    | Cytology: repeat in 6m<br>HPV+: Cytology                                   | Colposcopy                                                                                                                                                         |
| <b>22. Kitchener, 2017</b> | Cobas 4800                                                                    | Lavage (Delphi Screener)/<br>Evalyn Brush | 3m<br>6m<br>12m<br>18m                                | Cytology                                                                   | Colposcopy if triage by cytology was positive. Usual triage as recommended in NHS programme if cytology positive in control arm. No triage results were presented. |
| <b>23. Modibbo, 2017</b>   | (GP5+/6+-EIA PCR with LMNX genotyping)                                        | Dry flocced swab                          | 1m                                                    | ND                                                                         | Treatment and follow-up                                                                                                                                            |
| <b>24. Kellen, 2018</b>    | RIATOL qPCR                                                                   | Qvintip                                   | 12m                                                   | Cytology                                                                   | Not documented.                                                                                                                                                    |
| <b>25. Tranberg, 2018</b>  | SS arm: Cobas 4800.<br>Control arm: SurePath cytology<br>Cobas 4800 if 60-64y | Evalyn Brush                              | 6m                                                    | SS arm: SurePath cytology.                                                 | FU as defined in Danish programme<br>ASC-US/HPV+ & LSIL+ referred to colposcopy. If self HPV+ & NILM at 1 <sup>st</sup> triage: repeat cytology & HPV at 12m.      |

Abbreviations: ASC-US+: atypical squamous cells of undetermined significance or more severe results; EIA: enzyme immunoassay; FU: follow-up; HC2: Hybrid Capture 2; hrHPV: high-risk human papillomavirus; LMNX: Luminex; LSIL+: low-grade squamous intraepithelial lesions or more severe disease; ND: not documented; PCR: polymerase chain reaction; NML: Canadian National Microbiology Laboratory; RCT: randomized controlled trial; SS: self-sampling; VIA: visual inspection with acetic acid.

## 5. Assessment of the quality of diagnostic studies

**Table 8.** Quality assessment of included studies according to the QUADAS\* check list<sup>10</sup>.

| No | Author, year     | P1 | P2 | T1 | T2 | R1 | R2 | R3 | F1 | F2 | F3 | F4 | F5 | F6 | Patient selection | Test | Reference test | #Y | #U | #N | tot | %Y   | %U   | %N   |
|----|------------------|----|----|----|----|----|----|----|----|----|----|----|----|----|-------------------|------|----------------|----|----|----|-----|------|------|------|
| 1  | Morrison, 1992   | U  | U  | U  | U  | Y  | U  | Y  | Y  | Y  | Y  | Y  | Y  | Y  | Mod               | Mod  | Low            | 8  | 5  | 0  | 13  | 0.62 | 0.38 | 0.00 |
| 2  | Hillem, 1999     | U  | U  | U  | U  | Y  | U  | Y  | U  | Y  | Y  | U  | N  | N  | Mod               | Mod  | Low            | 4  | 7  | 2  | 13  | 0.31 | 0.54 | 0.15 |
| 3  | Sellors, 2000    | Y  | Y  | Y  | Y  | Y  | Y  | Y  | Y  | Y  | Y  | Y  | Y  | Y  | Low               | Low  | Low            | 13 | 0  | 0  | 13  | 1.00 | 0.00 | 0.00 |
| 4  | Wright, 2000     | U  | U  | Y  | Y  | Y  | Y  | N  | N  | N  | Y  | N  | N  | N  | Mod               | Low  | Low            | 6  | 2  | 5  | 13  | 0.46 | 0.15 | 0.38 |
| 5  | Belinson, 2001   | Y  | U  | Y  | Y  | Y  | Y  | Y  | Y  | Y  | Y  | Y  | Y  | Y  | Low               | Low  | Low            | 12 | 1  | 0  | 13  | 0.92 | 0.08 | 0.00 |
| 6  | Lorenzat, 2002   | Y  | Y  | Y  | U  | Y  | U  | Y  | Y  | Y  | Y  | Y  | Y  | N  | Low               | Low  | Low            | 10 | 2  | 1  | 13  | 0.77 | 0.15 | 0.08 |
| 7  | Nobbenh, 2002    | Y  | U  | U  | U  | Y  | U  | Y  | Y  | Y  | Y  | Y  | Y  | Y  | Low               | Mod  | Low            | 9  | 4  | 0  | 13  | 0.69 | 0.31 | 0.00 |
| 8  | Garcia, 2003     | Y  | U  | Y  | U  | Y  | Y  | Y  | Y  | Y  | Y  | N  | Y  | N  | Low               | Low  | Low            | 9  | 2  | 2  | 13  | 0.69 | 0.15 | 0.15 |
| 9  | Salmeron, 2003   | U  | U  | Y  | U  | Y  | N  | Y  | U  | N  | Y  | Y  | Y  | Y  | Mod               | Low  | Mod            | 7  | 4  | 2  | 13  | 0.54 | 0.31 | 0.15 |
| 10 | Brink 2006       | U  | U  | Y  | Y  | Y  | Y  | Y  | Y  | N  | Y  | N  | Y  | N  | Mod               | Low  | Low            | 8  | 2  | 3  | 13  | 0.62 | 0.15 | 0.23 |
| 11 | Daponte, 2006    | Y  | U  | U  | U  | Y  | U  | Y  | U  | Y  | Y  | U  | N  | N  | Low               | Mod  | Low            | 5  | 6  | 2  | 13  | 0.38 | 0.46 | 0.15 |
| 12 | Giranielli, 2006 | U  | U  | Y  | Y  | Y  | Y  | Y  | Y  | Y  | Y  | Y  | Y  | Y  | Mod               | Low  | Low            | 11 | 2  | 0  | 13  | 0.85 | 0.15 | 0.00 |
| 13 | Holanda, 2006    | U  | U  | Y  | U  | Y  | Y  | Y  | Y  | Y  | Y  | Y  | N  | N  | Mod               | Low  | Low            | 8  | 3  | 2  | 13  | 0.62 | 0.23 | 0.15 |
| 14 | Seo, 2006        | U  | U  | Y  | U  | Y  | U  | Y  | Y  | Y  | Y  | N  | N  | N  | Mod               | Low  | Low            | 6  | 4  | 3  | 13  | 0.46 | 0.31 | 0.23 |
| 15 | Szarewski, 2007  | Y  | U  | Y  | Y  | Y  | Y  | Y  | Y  | Y  | Y  | Y  | Y  | Y  | Low               | Low  | Low            | 12 | 1  | 0  | 13  | 0.92 | 0.08 | 0.00 |
| 16 | Qiao, 2008       | Y  | U  | Y  | Y  | Y  | Y  | Y  | Y  | Y  | Y  | Y  | Y  | Y  | Low               | Low  | Low            | 12 | 1  | 0  | 13  | 0.92 | 0.08 | 0.00 |
| 17 | Bhatla, 2009     | Y  | U  | Y  | U  | Y  | U  | Y  | Y  | Y  | Y  | Y  | N  | Y  | Low               | Low  | Low            | 9  | 3  | 1  | 13  | 0.69 | 0.23 | 0.08 |
| 18 | Balasubra., 2010 | Y  | U  | Y  | U  | Y  | U  | Y  | Y  | Y  | Y  | Y  | Y  | Y  | Low               | Low  | Low            | 10 | 3  | 0  | 13  | 0.77 | 0.23 | 0.00 |
| 19 | Gustavson, 2011  | U  | U  | U  | U  | Y  | Y  | Y  | Y  | Y  | Y  | Y  | N  | N  | Mod               | Mod  | Low            | 7  | 4  | 2  | 13  | 0.54 | 0.31 | 0.15 |
| 20 | Taylor, 2011     | Y  | U  | Y  | Y  | Y  | Y  | Y  | Y  | Y  | Y  | N  | N  | N  | Low               | Low  | Low            | 9  | 1  | 3  | 13  | 0.69 | 0.08 | 0.23 |
| 21 | Twu, 2011        | U  | U  | Y  | U  | Y  | U  | Y  | U  | N  | Y  | N  | Y  | Y  | Mod               | Low  | Low            | 6  | 5  | 2  | 13  | 0.46 | 0.38 | 0.15 |
| 22 | Belinson, 2012   | U  | U  | Y  | U  | Y  | U  | Y  | Y  | N  | Y  | Y  | N  | Y  | Mod               | Low  | Low            | 7  | 4  | 2  | 13  | 0.54 | 0.31 | 0.15 |
| 23 | Dijkstra, 2012   | U  | U  | U  | Y  | Y  | U  | Y  | Y  | Y  | Y  | N  | N  | N  | Mod               | Low  | Low            | 6  | 4  | 3  | 13  | 0.46 | 0.31 | 0.23 |
| 24 | L.-Filho, 2012   | Y  | U  | Y  | Y  | Y  | N  | Y  | U  | Y  | Y  | Y  | U  | U  | Low               | Low  | Mod            | 8  | 4  | 1  | 13  | 0.62 | 0.31 | 0.08 |
| 25 | van Baars, 2012  | U  | U  | U  | U  | N† | U  | U  | Y  | N  | U  | Y  | N  | N  | Mod               | Mod  | High           | 2  | 7  | 4  | 13  | 0.15 | 0.54 | 0.31 |
| 26 | Zhao, 2012a      | Y  | Y  | Y  | U  | Y  | U  | Y  | Y  | Y  | Y  | Y  | N  | N  | Low               | Low  | Low            | 9  | 2  | 2  | 13  | 0.69 | 0.15 | 0.15 |
| 27 | Zhao, 2012b      | Y  | Y  | Y  | U  | Y  | U  | Y  | Y  | Y  | Y  | Y  | N  | N  | Low               | Low  | Low            | 9  | 2  | 2  | 13  | 0.69 | 0.15 | 0.15 |
| 28 | Zhao, 2012c      | Y  | Y  | Y  | U  | Y  | U  | Y  | Y  | Y  | Y  | Y  | N  | N  | Low               | Low  | Low            | 9  | 2  | 2  | 13  | 0.69 | 0.15 | 0.15 |
| 29 | Darlin, 2013     | U  | U  | U  | U  | Y  | U  | Y  | Y  | Y  | Y  | Y  | Y  | N  | Mod               | Mod  | Low            | 7  | 5  | 1  | 13  | 0.54 | 0.38 | 0.08 |
| 30 | Geraets, 2013    | Y  | U  | U  | U  | Y  | U  | Y  | Y  | Y  | Y  | N  | N  | N  | Low               | Mod  | Low            | 6  | 4  | 3  | 13  | 0.46 | 0.31 | 0.23 |
| 31 | Guan, 2013       | N  | U  | U  | U  | Y  | U  | Y  | Y  | Y  | Y  | N  | N  | N  | High              | Mod  | Low            | 5  | 4  | 4  | 13  | 0.38 | 0.31 | 0.31 |
| 32 | Jentschke,2013a  | U  | U  | U  | U  | Y  | U  | Y  | U  | Y  | Y  | Y  | N  | N  | Mod               | Mod  | Low            | 5  | 6  | 2  | 13  | 0.38 | 0.46 | 0.15 |
| 33 | Jentschke,2013b  | U  | U  | Y  | U  | Y  | U  | Y  | U  | Y  | Y  | Y  | N  | N  | Mod               | Low  | Low            | 6  | 5  | 2  | 13  | 0.46 | 0.38 | 0.15 |
| 34 | Nieves, 2013     | Y  | Y  | U  | Y  | Y  | N  | Y  | U  | Y  | Y  | Y  | Y  | Y  | Low               | Low  | Mod            | 10 | 2  | 1  | 13  | 0.77 | 0.15 | 0.08 |

**Table 8** (continued).

| No | Author, year    | P1        | P2        | T1        | T2        | R1        | R2        | R3        | F1        | F2        | F3        | F4        | F5        | F6        | Patient selection | Test      | Reference test | #Y  | #U  | #N | tot | %Y   | %U   | %N   |
|----|-----------------|-----------|-----------|-----------|-----------|-----------|-----------|-----------|-----------|-----------|-----------|-----------|-----------|-----------|-------------------|-----------|----------------|-----|-----|----|-----|------|------|------|
| 35 | Zhao, 2013      | Y         | Y         | Y         | Y         | Y         | U         | Y         | U         | Y         | Y         | Y         | U         | U         | Low               | Low       | Low            | 9   | 4   | 0  | 13  | 0.69 | 0.31 | 0.00 |
| 36 | Chernesky, 2014 | U         | N         | Y         | U         | Y         | U         | Y         | Y         | Y         | Y         | U         | U         | U         | Mod               | Low       | Low            | 6   | 6   | 1  | 13  | 0.46 | 0.46 | 0.08 |
| 37 | Hesselink, 2014 | U         | U         | Y         | Y         | N         | U         | N         | U         | U         | U         | Y         | U         | U         | Mod               | Low       | Mod            | 3   | 8   | 2  | 13  | 0.23 | 0.62 | 0.15 |
| 38 | Jeronimo, 2014a | Y         | Y         | Y         | U         | Y         | U         | Y         | U         | N         | Y         | Y         | N         | N         | Low               | Low       | Low            | 7   | 3   | 3  | 13  | 0.54 | 0.23 | 0.23 |
| 39 | Jeronimo, 2014b | Y         | Y         | Y         | U         | Y         | U         | Y         | U         | N         | Y         | Y         | N         | N         | Low               | Low       | Low            | 7   | 3   | 3  | 13  | 0.54 | 0.23 | 0.23 |
| 40 | Jeronimo, 2014c | Y         | Y         | Y         | U         | Y         | U         | Y         | U         | N         | Y         | Y         | N         | N         | Low               | Low       | Low            | 7   | 3   | 3  | 13  | 0.54 | 0.23 | 0.23 |
| 41 | Jeronimo, 2014d | Y         | Y         | Y         | U         | Y         | U         | Y         | U         | N         | Y         | Y         | N         | N         | Low               | Low       | Low            | 7   | 3   | 3  | 13  | 0.54 | 0.23 | 0.23 |
| 42 | Wang, 2014      | Y         | Y         | Y         | N         | Y         | N         | N         | U         | N         | N         | U         | U         | U         | Low               | Mod       | High           | 4   | 4   | 5  | 13  | 0.31 | 0.31 | 0.38 |
| 43 | Zhang, 2014     | Y         | Y         | Y         | U         | Y         | U         | Y         | U         | Y         | Y         | Y         | U         | U         | Low               | Low       | Low            | 8   | 5   | 0  | 13  | 0.62 | 0.38 | 0.00 |
| 44 | Boggan, 2015    | N         | Y         | Y         | Y         | Y         | U         | N         | U         | N         | Y         | Y         | U         | U         | Mod               | Low       | Mod            | 6   | 4   | 3  | 13  | 0.46 | 0.31 | 0.23 |
| 45 | Porras, 2015    | Y         | Y         | Y         | N         | Y         | Y         | Y         | U         | U         | N         | Y         | U         | U         | Low               | Mod       | Low            | 7   | 4   | 2  | 13  | 0.54 | 0.31 | 0.15 |
| 46 | Chen, 2016 (a)  | Y         | U         | U         | U         | U         | U         | U         | U         | U         | U         | Y         | U         | U         | Low               | Mod       | Mod            | 2   | 11  | 0  | 13  | 0.15 | 0.85 | 0.00 |
| 47 | Chen, 2016 (b)  | U         | Y         | Y         | U         | Y         | Y         | Y         | Y         | Y         | Y         | U         | Y         | U         | Low               | Low       | Low            | 9   | 4   | 0  | 13  | 0.69 | 0.31 | 0.00 |
| 48 | Jentschke, 2016 | U         | Y         | Y         | Y         | Y         | Y         | Y         | Y         | Y         | Y         | Y         | Y         | N         | Low               | Low       | Low            | 11  | 1   | 1  | 13  | 0.85 | 0.08 | 0.08 |
| 49 | Qin, 2016       | Y         | Y         | U         | U         | Y         | Y         | Y         | Y         | Y         | Y         | Y         | Y         | U         | Low               | Mod       | Low            | 10  | 3   | 0  | 13  | 0.77 | 0.23 | 0.00 |
| 50 | Stanczuk, 2016  | Y         | U         | Y         | U         | Y         | U         | N         | U         | N         | N         | Y         | Y         | Y         | Low               | Low       | Mod            | 6   | 4   | 3  | 13  | 0.46 | 0.31 | 0.23 |
| 51 | Aiko, 2017      | Y         | Y         | U         | Y         | Y         | Y         | Y         | Y         | Y         | Y         | Y         | Y         | Y         | Low               | Low       | Low            | 12  | 1   | 0  | 13  | 0.92 | 0.08 | 0.00 |
| 52 | Asciutto, 2017  | U         | U         | Y         | Y         | Y         | Y         | Y         | Y         | Y         | Y         | N         | U         | U         | Mod               | Low       | Low            | 8   | 4   | 1  | 13  | 0.62 | 0.31 | 0.08 |
| 53 | Catarino, 2017  | Y         | Y         | U         | U         | U         | Y         | Y         | U         | N         | Y         | Y         | Y         | Y         | Low               | Mod       | Low            | 8   | 4   | 1  | 13  | 0.62 | 0.31 | 0.08 |
| 54 | Leeman, 2017    | U         | U         | U         | Y         | Y         | Y         | Y         | Y         | Y         | Y         | U         | Y         | Y         | Mod               | Low       | Low            | 9   | 4   | 0  | 13  | 0.69 | 0.31 | 0.00 |
| 55 | Asciutto, 2017  | U         | Y         | Y         | Y         | Y         | Y         | Y         | Y         | Y         | Y         | Y         | Y         | Y         | Low               | Low       | Low            | 12  | 1   | 0  | 13  | 0.92 | 0.08 | 0.00 |
| 56 | Leinonen, 2018  | N         | Y         | Y         | Y         | Y         | U         | Y         | Y         | Y         | Y         | Y         | Y         | Y         | Mod               | Low       | Low            | 11  | 1   | 1  | 13  | 0.85 | 0.08 | 0.08 |
|    | #yes            | 30        | 22        | 39        | 20        | 52        | 20        | 50        | 34        | 39        | 50        | 39        | 25        | 19        | 33                | 41        | 47             | 439 | 198 | 91 | 728 | 0.60 | 0.27 | 0.13 |
|    | #unclear        | 23        | 33        | 17        | 34        | 2         | 32        | 2         | 21        | 3         | 3         | 7         | 9         | 12        | 22                | 15        | 7              |     |     |    |     |      |      |      |
|    | #no             | 3         | 1         | 0         | 2         | 1         | 4         | 4         | 1         | 14        | 3         | 10        | 22        | 25        | 1                 | 0         | 2              |     |     |    |     |      |      |      |
|    | <b>total</b>    | <b>56</b>         | <b>56</b> | <b>56</b>      |     |     |    |     |      |      |      |
|    | % yes           | 54        | 39        | 70        | 36        | 93        | 36        | 89        | 61        | 70        | 89        | 70        | 45        | 34        | 59                | 73        | 84             |     |     |    |     |      |      |      |
|    | % unclear       | 41        | 59        | 30        | 61        | 4         | 57        | 4         | 38        | 5         | 5         | 13        | 16        | 21        | 39                | 27        | 13             |     |     |    |     |      |      |      |
|    | % no            | 5         | 2         | 0         | 4         | 2         | 7         | 7         | 2         | 25        | 5         | 18        | 39        | 45        | 2                 | 0         | 4              |     |     |    |     |      |      |      |

\* QUADAS=Quality Assessment of Diagnostic Accuracy Studies.

\*\* QUADAS items<sup>19</sup>: (P1) acceptable enrolment method, (P2) inappropriate exclusions avoided, (T1) pre-specified test cut-off, (T2) results of index and comparator tests blinded towards each other and reference test, (R1) acceptable reference test, (R2) results of reference test blinded towards index and comparator tests, (R3) incorporation bias avoided, (F1) acceptable delay between triage tests and reference test, (F2) partial verification avoided, (F3) differential verification avoided, (F4) withdrawals explained, (F5) uninterpretable results reported for tests, (F6) uninterpretable results reported for reference test. Each quality item is judged with: Y (fulfilled, green), U (unclear, yellow), N (not fulfilled, red).





## 6. Assessment of risk of bias in randomized trials

**Table 9.** Summary of the quality of included studies, according to the Cochrane Tool for Risk of Bias<sup>11</sup>.

| Risk of Bias         | Selection                  |                        | Attrition               | Reporting              |                     |
|----------------------|----------------------------|------------------------|-------------------------|------------------------|---------------------|
|                      | Random sequence generation | Allocation concealment | Incomplete outcome data | Reporting of timelines | Selective reporting |
| Bais, 2007           | Low                        | Medium                 | Low                     | Low                    | Low                 |
| Gok, 2010            | Low                        | Medium                 | Low                     | Low                    | Low                 |
| Giorgi-Rossi, 2011   | Low                        | Low                    | Low                     | Low                    | Low                 |
| Lazcano-Ponce, 2011  | Medium*                    | Low                    | Low                     | Medium                 | Medium <sup>¥</sup> |
| Piana, 2011          | Low                        | Medium                 | Low                     | Medium                 | High <sup>¥□</sup>  |
| Szarewski, 2011      | Medium <sup>^</sup>        | Medium                 | Low                     | Low                    | Low                 |
| Virtanen, 2011       | Low                        | Medium                 | Low                     | Low                    | Low                 |
| Wikstrom, 2011       | Medium <sup>^</sup>        | Medium                 | Low                     | Low                    | Low                 |
| Gok, 2012            | Low                        | Medium                 | Low                     | Low                    | Medium <sup>¥</sup> |
| Darlin, 2013         | Medium <sup>^</sup>        | Medium                 | Low                     | Medium                 | Medium <sup>¥</sup> |
| Sancho-Garnier, 2013 | Medium <sup>^</sup>        | Medium                 | Low                     | Low                    | Medium <sup>¥</sup> |
| Broberg, 2014        | Medium <sup>^</sup>        | Medium                 | Low                     | Medium                 | Low                 |
| Cadman, 2014         | Low                        | Low                    | Low                     | Low                    | Low                 |
| Arrossi, 2015        | Medium*                    | Low                    | Low                     | Low                    | Low                 |
| Cadman, 2015         | Low                        | Low                    | Low                     | Low                    | Low                 |
| Giorgi Rossi, 2015   | Low                        | Low                    | Low                     | Low                    | Low                 |
| Enerly, 2016         | High <sup>δ</sup>          | High                   | Low                     | Low                    | Medium              |
| Moses, 2016          | Low                        | Low                    | Low                     | Medium                 | Low                 |
| Racey, 2016          | Low                        | Low                    | Low                     | Medium                 | Low                 |
| Sultana, 2016        | Low                        | Low                    | Low                     | Low                    | Medium              |
| Zehbe, 2016          | Medium*                    | Medium                 | Low                     | Medium                 | Medium <sup>Ω</sup> |
| Kitchener, 2017      | Medium                     | Medium                 | Low                     | Low                    | Low                 |
| Modibbo, 2017        | High <sup>α</sup>          | Medium                 | Low                     | Low                    | Medium <sup>¥</sup> |
| Kellen, 2018         | Low                        | High <sup>ε</sup>      | Low                     | Low                    | Medium <sup>ε</sup> |
| Tranberg, 2018       | Low                        | Low                    | Low                     | Low                    | Low                 |

High=high risk of bias, Low=low risk of bias, Medium=intermediate risk of bias.

\* Non-random factor is included in design. Women assigned to the self-sampling arm who were found not at home, were reassigned to cytology.)

<sup>^</sup> Details of the randomization process are not documented.

<sup>¥</sup> Intention-to-treat analysis was not reported. If there were women who went to the clinic for conventional screening, after being invited for self-sampling, it was not documented.

<sup>□</sup> Women in the self-sampling arm could opt-out, and those who did were excluded from the analysis (possibly leading to an artificially high participation rate in the self-sampling arm).

\* Cluster-randomisation of community health workers to self-sampling and control arm.

<sup>Ω</sup> Intention-to-treat analysis unclear (nbs < than per protocol analysis)

<sup>φ</sup> Non-randomised trial.

<sup>δ</sup> Non-random factors in design. Investigators used randomisation to identify 800 screening non-attenders (300 each from age groups 26–34 and 35–49 years, and 200 from the age group 50–69 years). The remaining non-attenders in the study area screening programme were considered the control group.

<sup>β</sup> Concealment accomplished using distance between clusters.

<sup>α</sup> Randomisation occurred after enrolment.

<sup>ε</sup> Timing of invitation in experimental arms was different from invitation in the first control arm; compliance with cytology triage and detection rate of CIN2+ not reported.

## 7. Absolute accuracy of hrHPV DNA testing on self-samples

**Table 10.** Meta-analysis of the absolute sensitivity and specificity of hrHPV testing on self-samples, hrHPV testing on clinician samples to detect CIN2+ and CIN3+, by clinical setting (primary cervical cancer screening, testing of high-risk groups, follow-up of women because of previous cervical abnormalities and post-treatment follow-up).

| Sample                                                                | Test      | Number of studies |       | Sensitivity, in % (95% CI) |             | Specificity, in % (95% CI) |             |
|-----------------------------------------------------------------------|-----------|-------------------|-------|----------------------------|-------------|----------------------------|-------------|
|                                                                       |           | CIN2+             | CIN3+ | CIN2+                      | CIN3+       | CIN2+                      | CIN3+       |
| <i>Primary routine screening</i>                                      |           |                   |       |                            |             |                            |             |
| Self-sample                                                           | SA-based‡ | 14                | 8     | 77 (69-82)                 | 77 (67-85)  | 84 (77-88)                 | 87 (85-89)  |
|                                                                       | PCR‡      | 4                 | 2     | 96 (89-99)                 | 95 (91-98)† | 79 (65-89)                 | 86 (86-87)† |
| Clinician-sample                                                      | SA-based  | 14                | 8     | 93 (89-96)                 | 96 (94-97)  | 86 (81-90)                 | 90 (88-92)  |
|                                                                       | PCR       | 4                 | 2     | 96 (91-98)†                | 96 (93-98)† | 79 (60-90) †               | 88 (88-89)* |
| <i>Testing of high-risk groups</i>                                    |           |                   |       |                            |             |                            |             |
| Self-sample                                                           | SA-based  | 2                 | 0     | 84 (78-90)†                | -           | 77 (76-79)†                | -           |
|                                                                       | PCR       | 1                 | 0     | 100 (83-1.00)*             | -           | 61 (55-67)*                | -           |
| Clinician-sample                                                      | SA-based  | 2                 | 0     | 93 (89-97)†                | -           | 83 (81-84)†                | -           |
|                                                                       | PCR       | 1                 | 0     | 100 (83-1.00)*             | -           | 64 (58-70)*                | -           |
| <i>Follow-up of previous cervical abnormalities/Colposcopy clinic</i> |           |                   |       |                            |             |                            |             |
| Self-sample                                                           | SA-based  | 7                 | 4     | 79 (69-87)                 | 81 (52-95)  | 51 (33-68)                 | 39 (22-61)  |
|                                                                       | PCR       | 13                | 7     | 88 (84-91)                 | 90 (81-95)  | 51 (42-59)                 | 46( 35-57)  |
| Clinician-sample                                                      | SA-based  | 7                 | 4     | 94 (86-98)                 | 90 (76-96)* | 64 (42-82)                 | 44 (27-63)* |
|                                                                       | PCR       | 13                | 7     | 90 (86-93)                 | 96 (90-98)  | 48 (40-56)                 | 43 (30-56)  |
| <i>Post treatment follow-up</i>                                       |           |                   |       |                            |             |                            |             |
| Self-sample                                                           | SA-based  | 1                 | 0     | 55 (36-72)                 | -           | 64 (60-67)                 | -           |
| Clinician sample                                                      | SA-based  | 1                 | 0     | 85 (68-95)                 | -           | 73 (69-76)                 | -           |

† Separate random effect models used for pooling of binomial data, ignoring correlation between sensitivity and specificity. \* No pooling since only 1 study.

‡SA-based: signal-amplification based hrHPV DNA tests (Hybrid Capture II or Cervista). PCR: hrHPV DNA testing with clinically validated polymerase chain reaction.

## 8. Relative accuracy of hrHPV testing on self- compared to clinician-samples

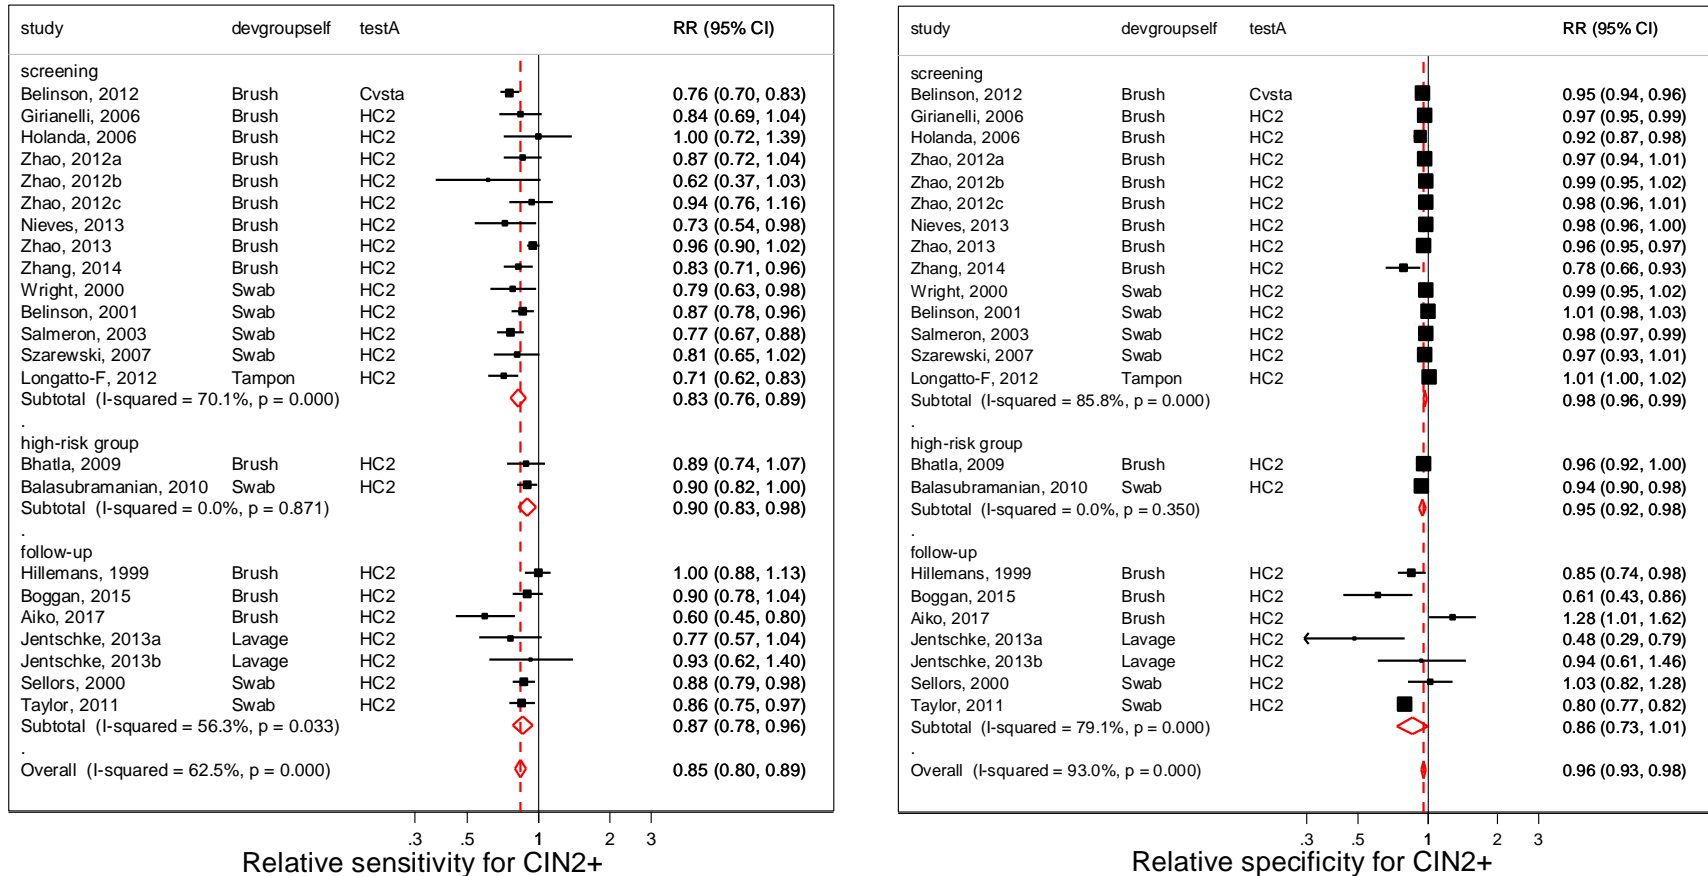

**Figure 3.** Relative sensitivity (left) and specificity (right) of hrHPV testing with signal-amplification based tests on self-samples compared to hrHPV testing on clinician samples to detect CIN2+, by clinical setting. p value for inter-setting heterogeneity = 0.394 for relative sensitivity and = <0.0001 for relative specificity.

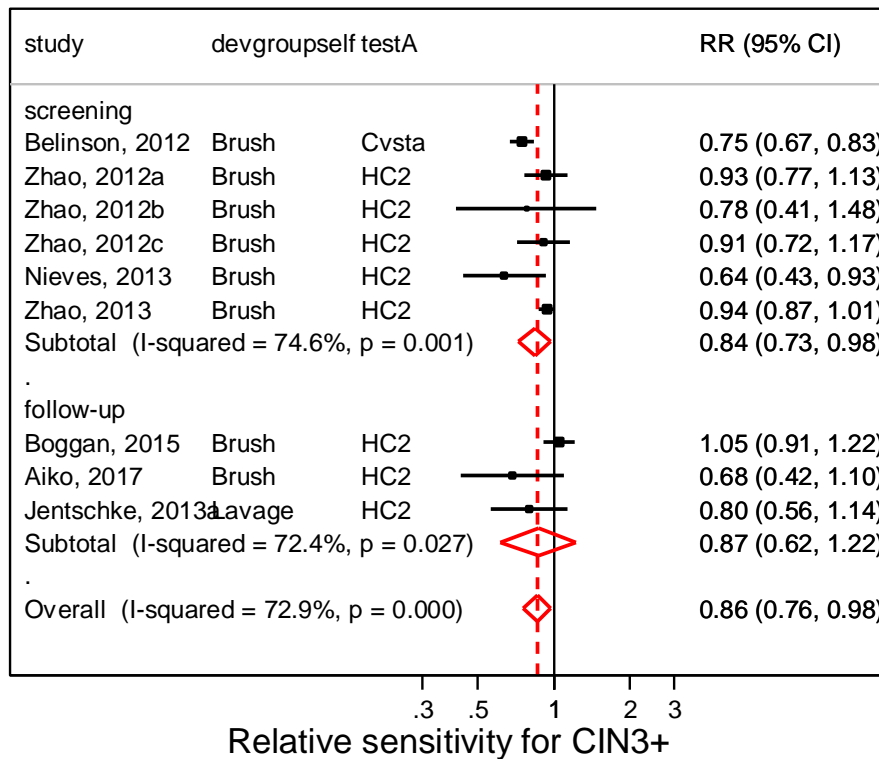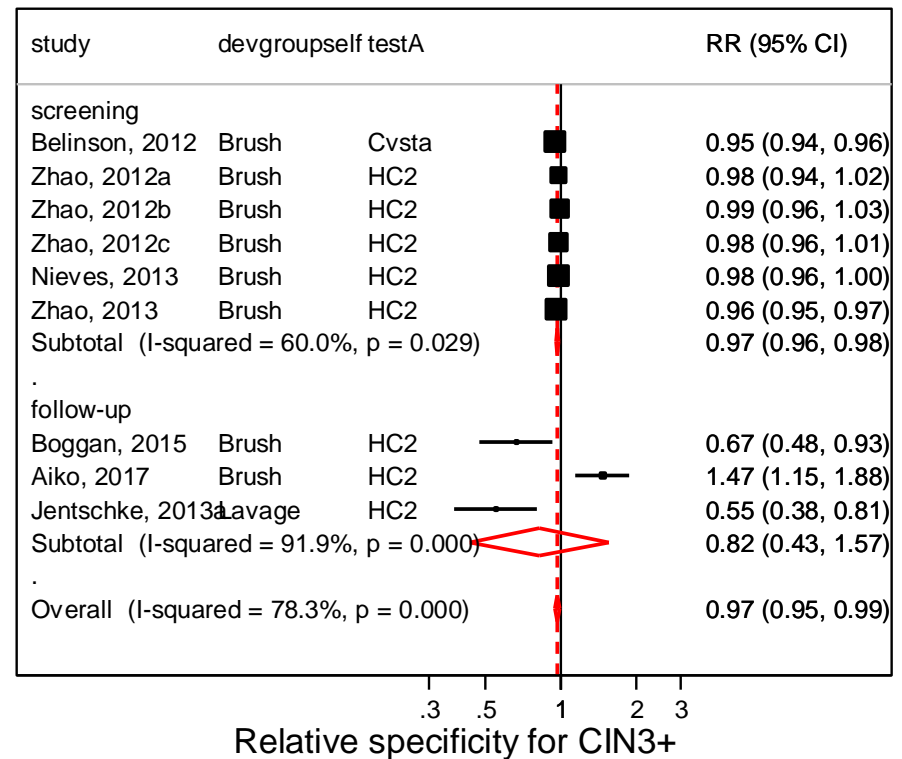

**Figure 4.** Relative sensitivity (left) and specificity (right) of hrHPV testing with signal-amplification based tests on self-samples compared to hrHPV testing on clinician samples to detect CIN3+, by clinical setting. p value for inter-setting heterogeneity = 0.109 for relative sensitivity and <0.0001 for relative specificity.

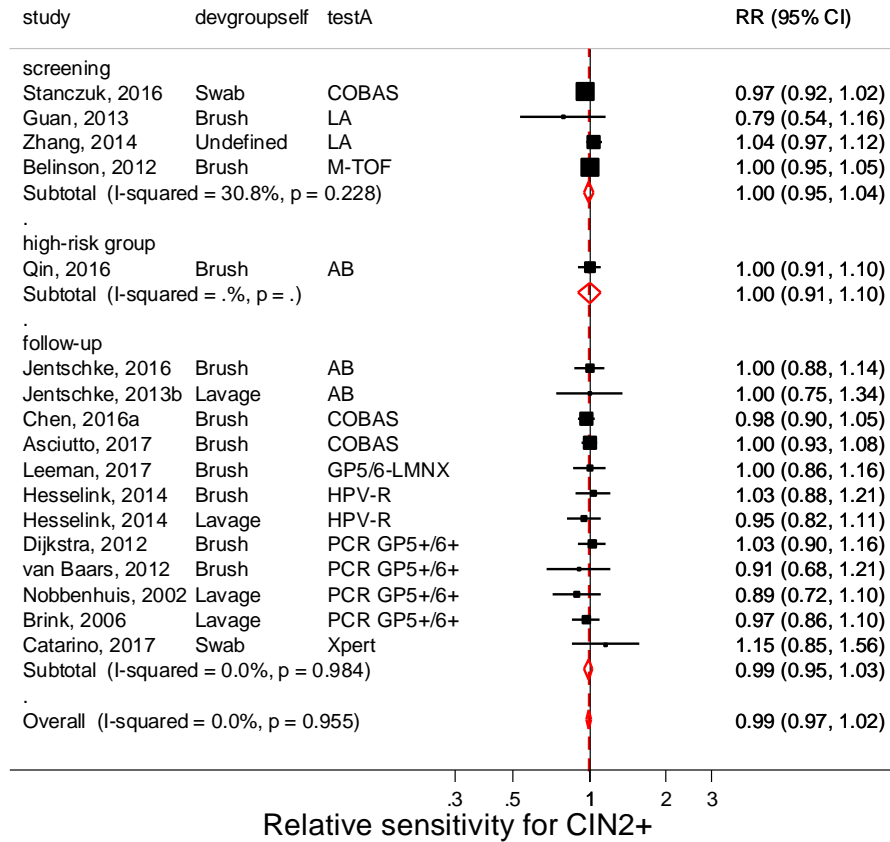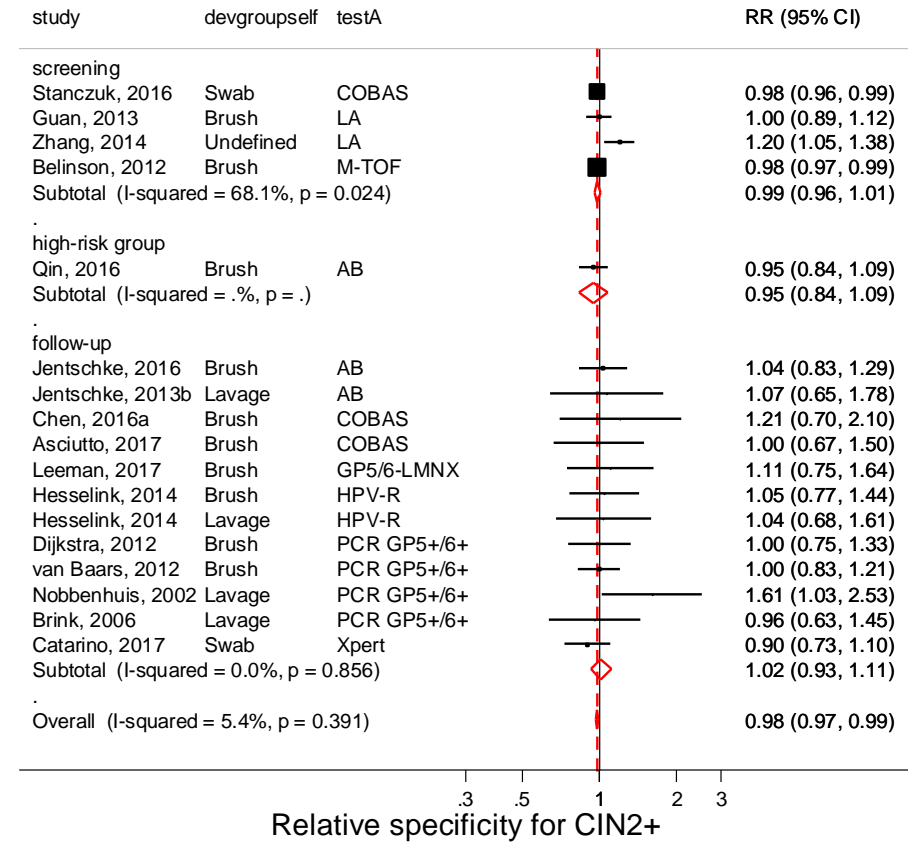

**Figure 5.** Relative sensitivity (left) and specificity (right) of hrHPV testing using clinically validated PCR based assays on self-samples compared to hrHPV testing on clinician samples to detect CIN2+, by clinical setting. p value for inter-setting heterogeneity = 0.989 for relative sensitivity and =0.616 for relative specificity.

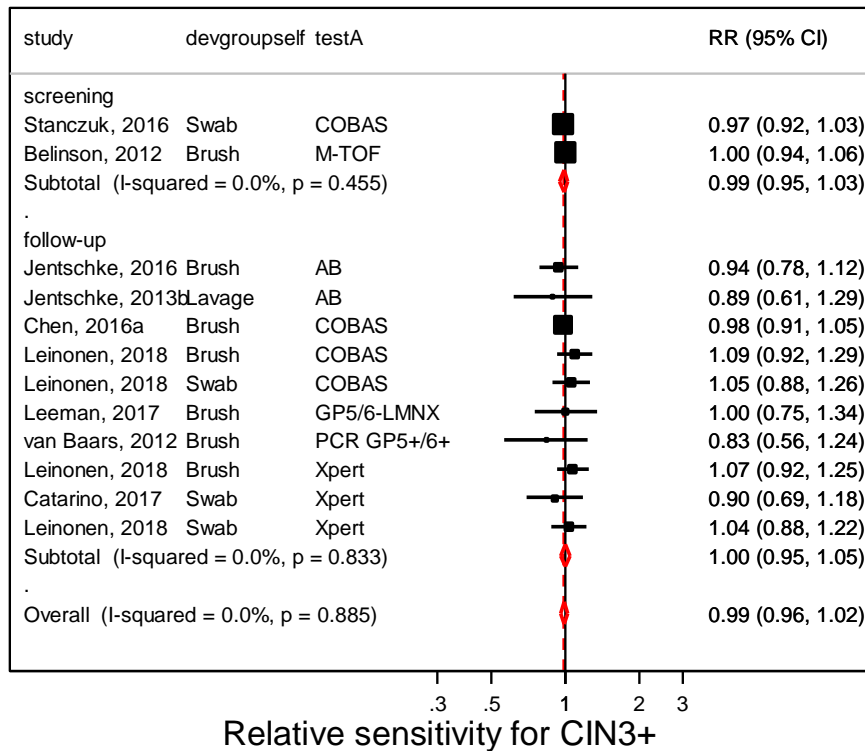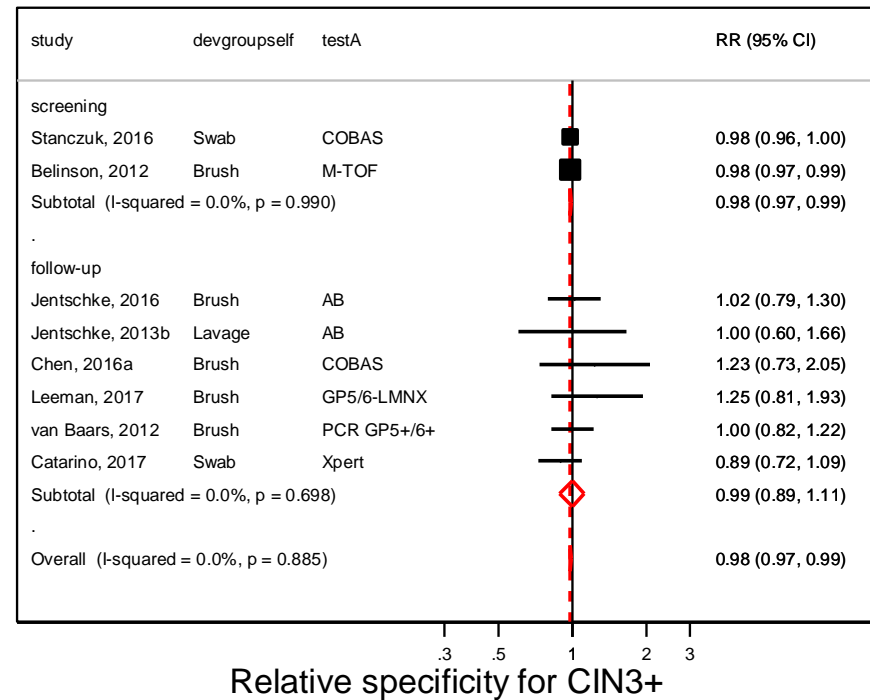

**Figure 6.** Relative sensitivity (left) and specificity (right) of hrHPV testing using clinically validated PCR-based assays on self-samples compared to hrHPV testing on clinician samples to detect CIN3+, by clinical setting. p value for inter-setting heterogeneity = 0.683 for relative sensitivity and = 0.799 for relative specificity.

## 9. Effect of covariates on the relative accuracy of hrHPV testing on self- vs to clinician samples

### 9.1. Test effects

**Table 11.** Variation in relative sensitivity and specificity (and 95% CI) of hrHPV testing on self-samples compared to clinician samples to detect CIN2+, according to the used hrHPV test. Relative values were computed using a bivariate normal model for the logits of sensitivity and specificity.

| Covariate                   | Number of studies | Relative sensitivity | Relative specificity |
|-----------------------------|-------------------|----------------------|----------------------|
| <i>Test</i>                 |                   |                      |                      |
| <b>SA-hrHPV Tests:</b>      |                   |                      |                      |
| HC2                         | 22                | 0.85 (0.81-0.89)*    | 0.96 (0.94-0.97)*    |
| Cervista                    | 1                 | 0.76 (0.70-0.83)*    | 0.95 (0.94-0.99)*    |
| careHPV                     | 7                 | 0.84 (0.76-0.92)*    | 1.00 (0.99-1.00)     |
| <b>PCR-hrHPV Tests:</b>     |                   |                      |                      |
| GP5+/6+ PCR-EIA             | 6                 | 0.94 (0.88-1.02)     | 1.09 (0.96-1.22)     |
| Linear Array†               | 2                 | 1.00 (0.93-1.07)     | 1.11 (1.00-1.23)     |
| HPV DNA Chip                | 1                 | 1.03 (0.89-1.19)     | 0.88 (0.55-1.42)     |
| Abbott RealTime hrHPV test† | 3                 | 1.00 (0.93-1.08)     | 0.98 (0.88-1.09)     |
| MALDI-TOF                   | 1                 | 1.00 (0.95-1.05)     | 0.98 (0.97-0.99)*    |
| Cobas-4800†                 | 3                 | 0.98 (0.94-1.02)     | 0.93 (0.86-1.01)     |
| SPF10-DEIA                  | 4                 | 0.97 (0.91-1.02)     | 0.97 (0.92-1.02)     |
| Modified GP5+/6+-Luminex    | 1                 | 0.96 (0.75-1.24)     | 0.94 (0.67-1.33)     |
| HPV Risk                    | 1                 | 0.95 (0.82-1.11)     | 1.04 (0.68-1.61)     |
| GP5+/6+-LMNX                | 1                 | 1.00 (0.86-1.16)     | 1.11 (0.75-1.64)     |
| Xpert HPV                   | 1                 | 1.15 (0.85-1.56)     | 0.90 (0.73-1.10)     |
| <b>hrHPV mRNA Test:</b>     |                   |                      |                      |
| APTIMA†                     | 3                 | 0.69 (0.52-0.92)*    | 0.97 (0.92-1.02)     |

\* ratio statistically significantly different from 1. † Correlation between logit sensitivity and logit FPR were relaxed since the bivariate model with correlation did not converge.

## 9.2. Self-sampling device effects

**Table 12.** Relative sensitivity and specificity for CIN2+ of hrHPV testing on self- vs. clinician samples, stratified by self-sampling device.

| Covariate                                           | Number of studies | Relative sensitivity | Relative specificity |
|-----------------------------------------------------|-------------------|----------------------|----------------------|
| <i>Self-sampling device, if SA-hrHPV DNA tests</i>  |                   |                      |                      |
| Cytobrush†                                          | 3                 | 0.97 (0.92-1.02)     | 0.94 (0.89-0.98)*    |
| Conical brush                                       | 7                 | 0.85 (0.79-0.91)*    | 0.97 (0.95-0.99)*    |
| POI/NIH self-sampler                                | 2                 | 0.74 (0.66-0.83)*    | 0.97 (0.95-0.99)     |
| Evalyn Brush                                        | 1                 | 0.66 (0.45-0.80)*    | 1.28 (1.01-1.62)*    |
| Delphi Sampler                                      | 2                 | 0.82 (0.65-1.05)     | 0.68 (0.35-1.33)     |
| Dacron swab                                         | 6                 | 0.86 (0.82-0.90)*    | 0.94 (0.88-1.02)     |
| Cotton swab                                         | 1                 | 0.81 (0.65-1.02)     | 0.97 (0.93-1.01)     |
| Tampon                                              | 1                 | 0.71 (0.62-0.83)*    | 0.96 (0.94-0.98)*    |
| <i>Self-sampling device, if validated hrHPV PCR</i> |                   |                      |                      |
| Conical brush                                       | 4                 | 1.02 (0.97-1.06)     | 0.98 (0.97-0.99)     |
| POI/NIH self-sampler                                | 1                 | 0.96 (0.89-1.03)     | 0.98 (0.97-0.99)     |
| Evalyn-Brush                                        | 3                 | 0.99 (0.90-1.09)     | 1.03 (0.90-1.17)     |
| Qvintip                                             | 1                 | 0.93 (0.80-1.09)     | 1.07 (0.87-1.32)     |
| Vibabrush                                           | 2                 | 0.95 (0.83-1.09)     | 1.18 (0.98-1.42)     |
| Lavage                                              | 2                 | 0.95 (0.85-1.06)     | 1.23 (0.74-2.05)     |
| Delphi Sampler                                      | 2                 | 0.96 (0.84-1.10)     | 1.05 (0.76-1.47)     |
| Dacron swab                                         | 1                 | 0.97 (0.92-1.02)     | 0.98 (0.96-0.99)     |
| Cotton swab                                         | 2                 | 1.04 (0.85-1.28)     | 0.91 (0.76-1.09)     |
| Cobas PCR Female Swab Sample Kit                    | 1                 | 1.00 (0.93-1.08)     | 1.00 (0.67-1.50)     |

† A continuity correction was applied to avoid exclusion of studies with 100% sensitivity on self and 100% specificity on the clinician samples: +0.5 for the TP self and FN self, + correction factor for the TPclin and the FNclin. The correction factor =  $((TP_{self} * TP_{clin} + 0.5 * TP_{clin}) / (TP_{self} + 1)) - TP_{clin}$  \*  $(TP_{self} + 1) / (-TP_{self})$ .

\* Statistically significant.

PS: Table is restricted to relevant well characterized devices.



### 9.3. Transport/storage medium effects

**Table 13.** Relative sensitivity and specificity for CIN2+ of hrHPV testing on self- vs. clinician samples, stratified by individual storage medium or transport recipients.

| Covariate                                                            | Number of studies | Relative sensitivity | Relative specificity |
|----------------------------------------------------------------------|-------------------|----------------------|----------------------|
| <b><i>Transport/storage Medium, if SA-hrHPV DNA tests</i></b>        |                   |                      |                      |
| <i>Cell-preserving media</i>                                         |                   |                      |                      |
| PreservCyt                                                           | 2                 | 0.76 (0.70-0.83)*    | 0.96 (0.94-0.99)*    |
| SurePath                                                             | 0                 | -                    | -                    |
| CitoLiq                                                              | 1                 | 0.84 (0.69-1.04)     | 0.97 (0.95-0.99)*    |
| <i>Media allowing virological testing</i>                            |                   |                      |                      |
| STM                                                                  | 12                | 0.85 (0.81-0.89)*    | 0.96 (0.92-0.99)*    |
| PBS                                                                  | 1                 | 0.77 (0.57-1.04)     | 0.48 (0.29-0.79)*    |
| UCM                                                                  | 1                 | 1.00 (0.72-1.39)     | 0.92 (0.87-0.98)*    |
| CCM                                                                  | 1                 | 0.96 (0.90-1.02)     | 0.96 (0.95-0.97)*    |
| <b><i>Transport/storage Medium, if validated PCR-hrHPV tests</i></b> |                   |                      |                      |
| <i>Cell-preserving media</i>                                         |                   |                      |                      |
| PreservCyt                                                           | 4                 | 1.00 (0.96-1.04)     | 0.98 (0.97-0.99)*    |
| SurePath                                                             | 2                 | 0.99 (0.90-1.10)     | 1.02 (0.79-1.31)     |
| CitoLiq                                                              | 0                 | -                    | -                    |
| <i>Media allowing virological testing</i>                            |                   |                      |                      |
| PBS                                                                  | 1                 | 0.89 (0.72-1.10)     | 1.61 (1.03-2.53)*    |
| Roche PCR medium                                                     | 1                 | 0.97 (0.92-1.02)     | 0.98 (0.96-0.99)     |
| Cobas collection kit                                                 | 1                 | 1.00 (0.93-1.08)     | 1.00 (0.67-1.50)     |
| <i>Dry collection</i>                                                |                   |                      |                      |
| Evalyn tube                                                          | 3                 | 0.99 (0.90-1.09)     | 1.03 (0.90-1.17)     |
| Qvintip tube                                                         | 1                 | 0.93 (0.80-1.09)     | 1.07 (0.87-1.32)     |
| FTA cartridge†                                                       | 3                 | 0.93 (0.83-1.05)     | 1.03 (0.91-1.17)     |

† a special continuity correction was applied to avoid exclusion of studies with 100% sensitivity on self and 100% sensitivity on the clinician samples: +0.5 for the TP self and FN self, + correction factor for the TPclin and the FNclin. The correction factor =  $((TP_{self} * TP_{clin} + 0.5 * TP_{clin}) / (TP_{self} + 1)) - TP_{clin} * (TP_{self} + 1) / (-TP_{self})$ .

PS: Table is restricted to relevant well characterised media used to store vaginal self-collected material.

### 9.4. Influence of study quality/design

In a bivariate random-effects meta-regression model, including sampling procedure (self- vs. clinician sampling) and the study setting (screening, high-risk group testing, or follow-up, and restricting to validated PCR-hrHPVs, the addition of QUADAS items did not contribute, in general, in a significantly better fit of the accuracy estimates for outcome CIN2+. There were only a few exceptions:

- The sensitivity of PCR-hrHPV testing for CIN2+, was significantly higher when the reference standard interpretation was blinded compared to when it was not blinded to the hrHPV tests (ratio: 1.07, 95% CI: 1.01-1.13, p=0.0268).
- The sensitivity was higher when avoidance of partial verification was unclear compared to when verification was partial (ratio: 1.10, 95% CI: 1.01-1.20, p=0.0360); in addition the specificity was lower when partial verification was unclear vs. clearly partial (0.54, 95% CI: 0.32-0.89, p=0.0162) and also when partial verification was avoided vs. clearly partial (ratio: 0.75, 95% CI: 0.60-0.93, p=0.0105).
- The sensitivity was lower when withdrawals of subjects were clearly explained vs. when not explained (ratio: 0.95, 95% CI: 0.90-0.99, p=0.0209).

- The sensitivity was higher when reporting of un-interpretable test results was unclear vs. when not reported (ratio: 1.08, 95% CI: 1.02-1.14,  $p=0.0109$ ). The specificity was lower when reporting of un-interpretable test results was unclear vs. when clearly not reported (ratio: 0.41, 95% CI: 0.30-0.56,  $p<0.0001$ ).
- The sensitivity was higher when reporting of un-interpretable results of the reference standard was unclear vs. when not reported (ratio: 1.06, 95% CI: 1.01-1.12,  $p=0.0112$ ). The specificity was lower when reporting of un-interpretable reference test results was unclear vs. when clearly not reported (ratio: 0.56, 95% CI: 0.40-0.77,  $p=0.0004$ ).
- When the significance level ( $\alpha$  accepted at  $p<0.05$ ) was adjusted by applying a Bonferroni correction ( $\alpha/k=0.05/13=0.0038$ ) for multiple testing, only contrasts marked in bold above still were significant. The adjusted relative sensitivity and specificity of hrHPV DNA testing on self- vs. clinician sample was not affected by inclusion of the QUADAS items into the multivariate regression model.

## 9.5. Small study effects, publication bias

### Absolute accuracy

The effect of study size on accuracy estimates of hrHPV tests performed on self- and clinician samples, in the context of screening was assessed from a regression of the effective study size against the logarithm of the diagnostic odds ratio as proposed by Deeks *et al.* (J Clin Epidemiol 2005;58: 882-93)<sup>12</sup>, see [Table 14](#).

**Table 14.** Small study effects in the absolute accuracy of hrHPV testing on self-samples and in the accuracy of hrHPV testing on clinician samples.

| Collection type   | Category<br>hrHPV DNA test | Outcome | p value |
|-------------------|----------------------------|---------|---------|
| Self-samples      | SA                         | CIN2+   | 0.94    |
|                   |                            | CIN3+   | 0.49    |
|                   | Validated PCR              | CIN2+   | 0.26    |
|                   |                            | CIN3+   | -       |
| Clinician-samples | SA                         | CIN2+   | 0.64    |
|                   |                            | CIN3+   | 0.96    |
|                   | Validated PCR              | CIN2+   | 0.56    |
|                   |                            | CIN3+   | -       |

No evidence of small study effects could be identified (p always >0.25).

### Relative accuracy

p values in the relative sensitivity and specificity are assessed as proposed by Harbord *et al.*

(Stat Med 2006; 20:641–54). The intercept and the slope of the regression of  $Z/\sqrt{V}$  against  $\sqrt{V}$  are shown when the p-values are significant (p<0.05).

Only for the relative sensitivity of PCR-hrHPV tests on self- vs. clinician samples, a significant small study effect could be identified.

**Table 15.** Small study effects in the relative accuracy of hrHPV testing on self-samples vs. clinician samples.

| Test                     | Outcome | p<br>(relative<br>sensitivity) | Intercept<br>(bias)    | Slope                 | p<br>(relative<br>specificity) |
|--------------------------|---------|--------------------------------|------------------------|-----------------------|--------------------------------|
| SA-hrHPV tests           | CIN2+   | 0.062                          | -                      | -                     | 0.220                          |
|                          | CIN3+   | 0.286                          | -                      | -                     | 0.775                          |
| Validated PCR-hrHPV test | CIN2+   | 0.428                          | -                      | -                     | 0.051                          |
|                          | CIN3+   | 0.013                          | -0.98 (-1.64 to -0.31) | -0.01 (-0.02 to 0.04) | 0.329                          |

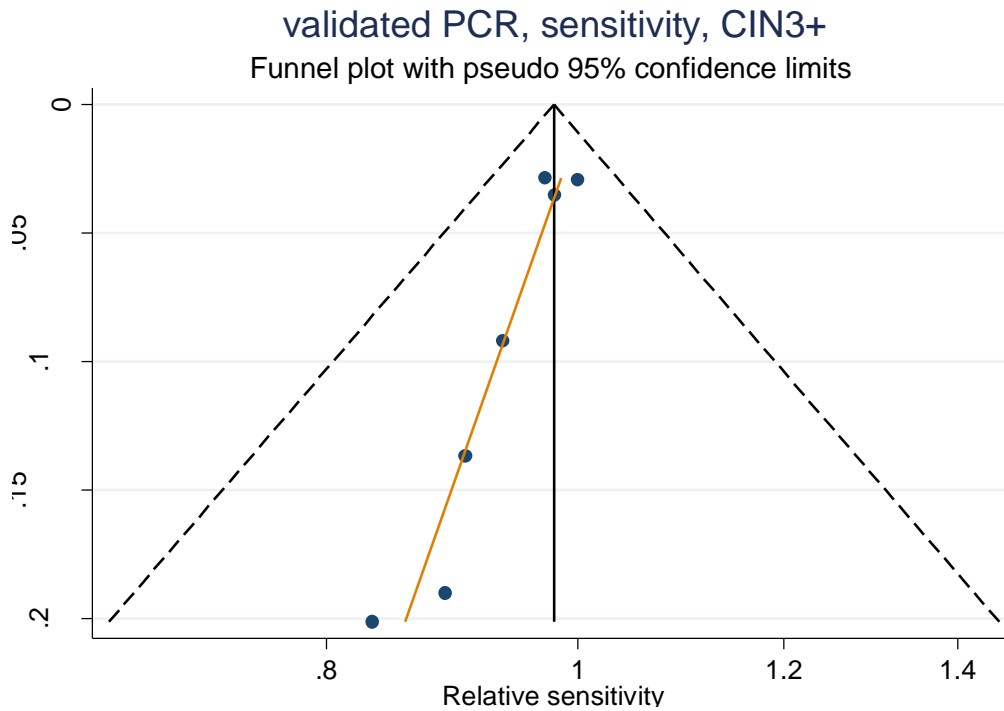

**Figure 7.** Funnel plot of the relative sensitivity for CIN3+ of hrHPV testing on self-samples versus clinician samples.

The effect size, on the X axis (log of the relative sensitivity, on an exponentiated scale) is plotted against a measure related to the study size measure on the Y axis (standard error of the relative sensitivity). Some asymmetry can be discerned, with more small studies (at the bottom, left) showing a low relative sensitivity for CIN3+.

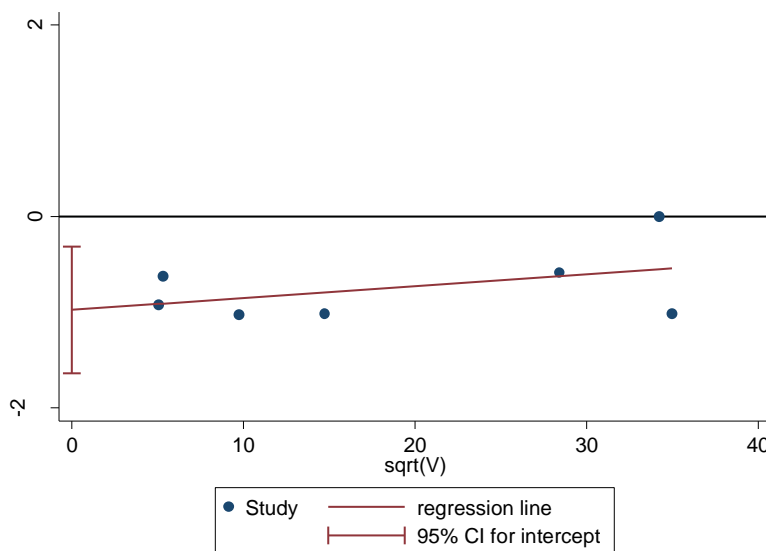

**Figure 8.** Small study effect in the relative sensitivity for CIN3+ of hrHPV testing with validated PCR-hrHPV tests on self- vs. clinician samples.

The Harbord's plot is based on the regression of  $Z/\sqrt{V}$  against  $\sqrt{V}$ .  $Z$  is the efficient score and  $V$  is the variance of  $Z$  under the null hypothesis (Harbord *et al.*, Stat Med 2006; 20: 641–54). The intercept is statistically different from zero, whereas the slope is not significantly different from a horizontal line.

## 10. Participation in the self-sampling arm and control arm of RCTs

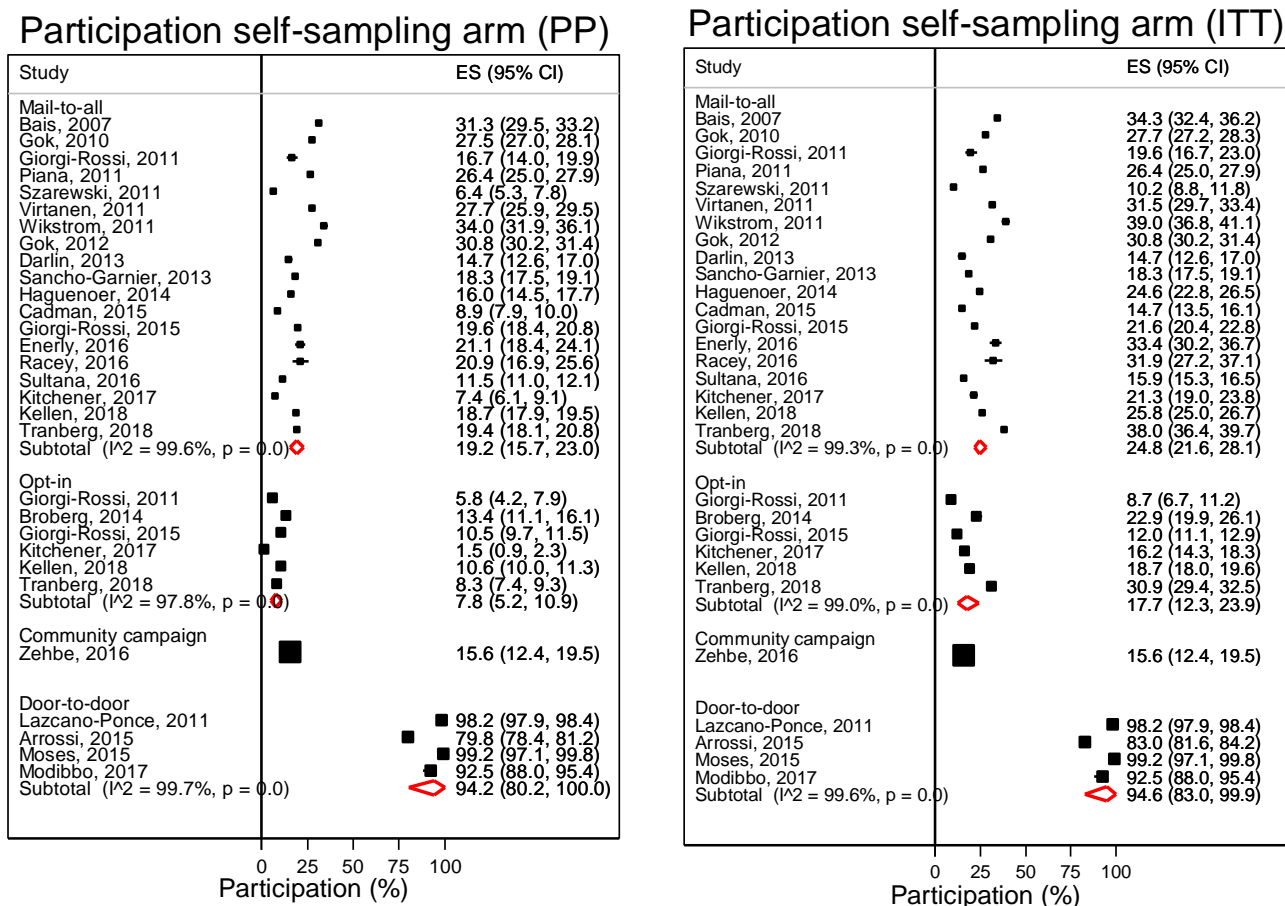

**Figure 9.** Participation rate in the self-sampling arm of randomized trials. Left: per-protocol (PP) analysis (only hrHPV tests on self-samples counted); right: intention-to-treat (ITT) analysis (also Pap smears counted).

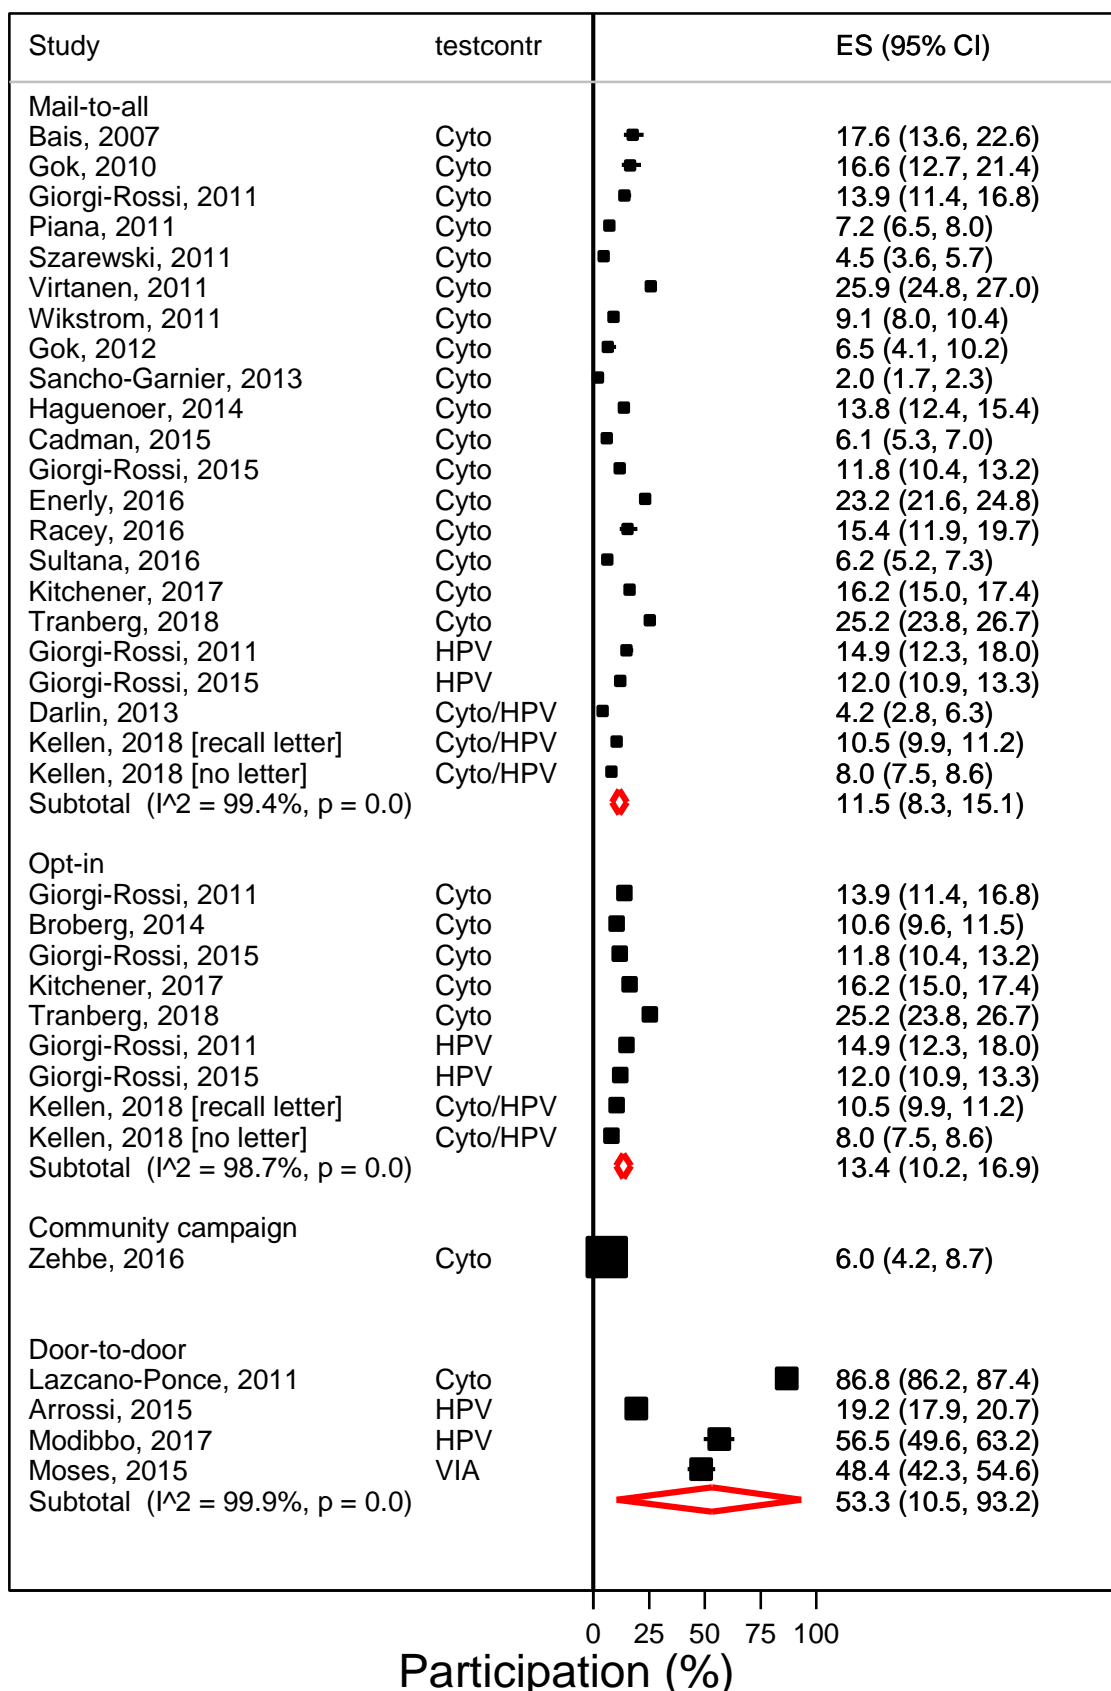

**Figure 10.** Participation in the control arm according to the invitation scenario applied in the self-sampling arm.

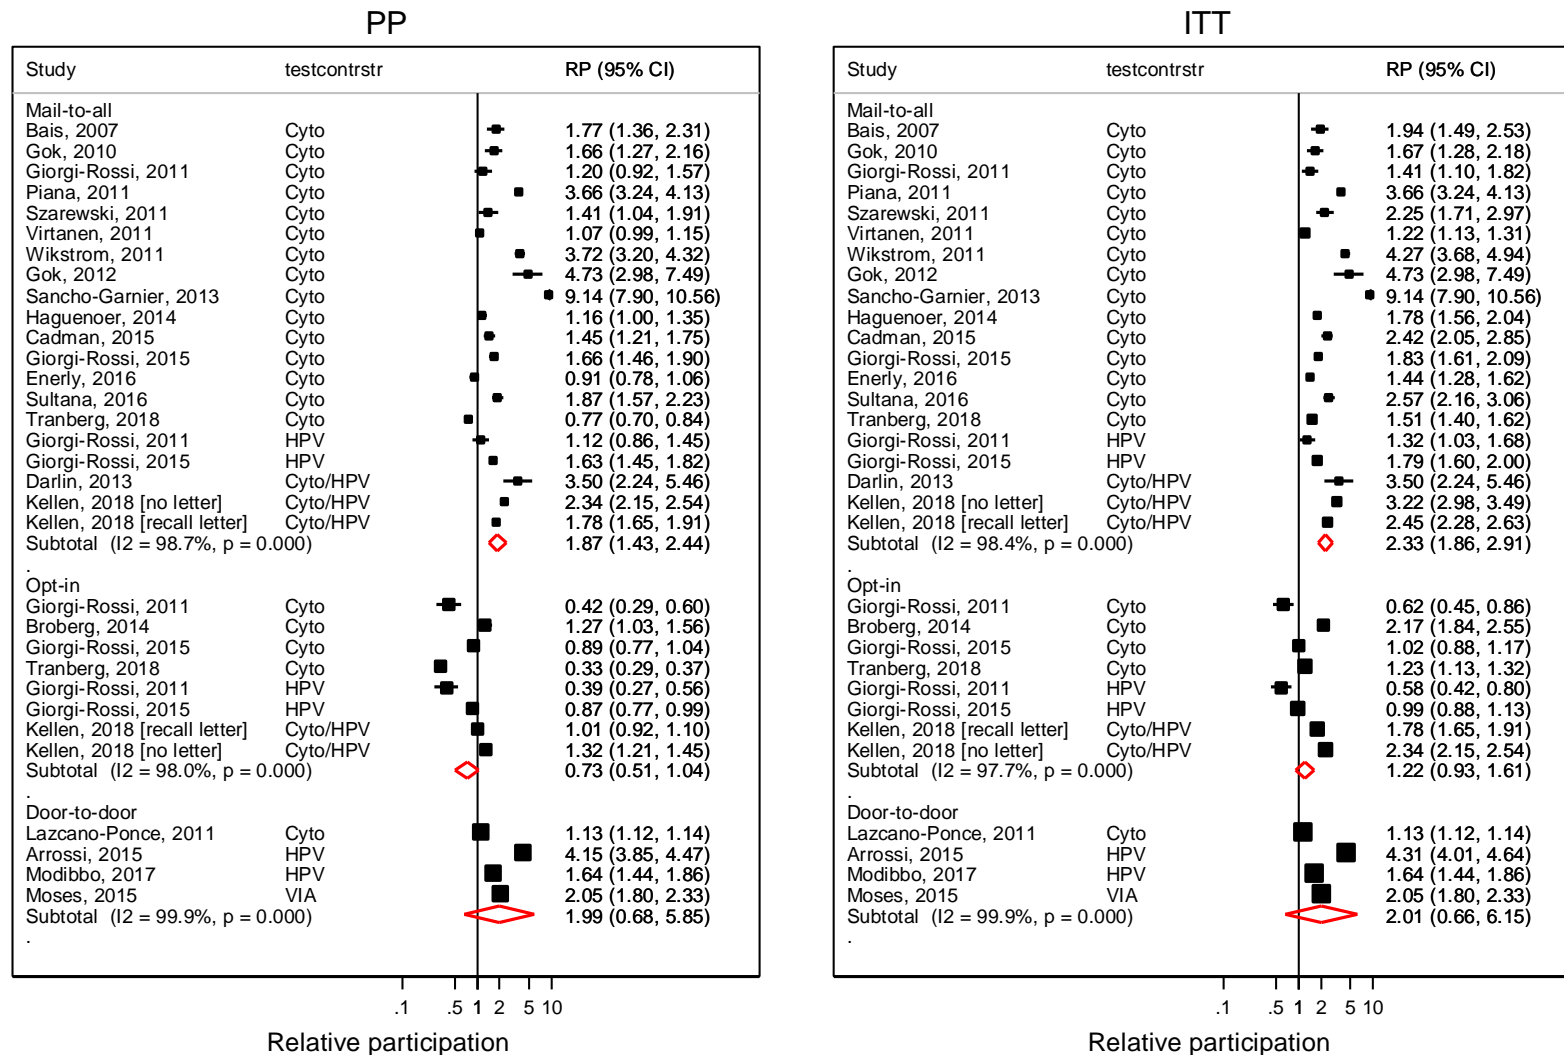

**Figure 11.** Relative participation (RP) in the self-arm vs. the control arm of randomized trials. Left: per-protocol (PP) analysis, right: intention-to-treat (ITT) analysis.

**Table 16.** Participation rate in the self-sampling arm and control arms and relative participation in randomized trials that reported data stratified by screening history status.

| Study          | Age (years) | Scenario    | Screening history   | Participation self-sample arm | control arm | Relative participation (95% CI) | p†      |
|----------------|-------------|-------------|---------------------|-------------------------------|-------------|---------------------------------|---------|
| Gok, 2010      | 30-60       | Mail-to all | screened ≥ 5 y ago  | 27.7%                         | 16.6%       | 1.67 (1.28-2.18)                | 0.8480  |
|                |             |             | screened >7 y ago   | 15.8%                         | 9.0%        | 1.76 (1.09-2.86)                |         |
| Broberg, 2014  | 30-62       | Opt-in      | screened ≤ 10 y ago | 39.7%                         | 16.9%       | 2.35 (1.88- 2.931)              | 0.1708  |
|                |             |             | screened > 10 y ago | 20.3%                         | 7.0%        | 2.89 (2.14-3.89)                |         |
|                |             |             | never screened      | 19.1%                         | 9.7%        | 1.96 (1.50-2.56)                |         |
| Cadman, 2015   | 25-65       | Mail-to all | screened 0-3y ago   | 29.5%                         | 16.4%       | 1.81 ( 0.85- 3.83)              | 0.1776  |
|                |             |             | screened 3-5y ago   | 33.1%                         | 15.1%       | 2.19 ( 1.71-2.81)               |         |
|                |             |             | screened 5-10y ago  | 18.8%                         | 7.5%        | 2.50 ( 1.85-3.37 )              |         |
|                |             |             | screened >10y ago   | 11.3%                         | 2.3%        | 4.94 (2.60-9.39)                |         |
|                |             |             | never screened      | 8.3%                          | 3.1%        | 2.68 ( 1.81-3.96)               |         |
| Sultana, 2016  | 30-69       | Mail-to all | screened >2.5 y ago | 11.6%                         | 6.4%        | 1.80 (1.41-2.29)                | 0.3934  |
|                |             |             | never screened      | 20.5%                         | 9.4%        | 2.18 (1.51-3.15)                |         |
| Tranberg, 2018 | 30-64       | Mail-to all | regularly screened* | 29.7%                         | 35.7%       | 0.83 (0.76-0.91)                | <0.0001 |
|                |             |             | under-screened      | 25.3%                         | 14.3%       | 1.78 ( 1.45-2.18)               |         |
|                |             |             | never screened      | 19.9%                         | 7.2%        | 2.75 ( 1.96- 3.84)              |         |
|                |             | Opt-in      | regularly screened  | 43.2%                         | 35.7%       | 1.21 (0.76-0.91)                | <0.0001 |
|                |             |             | under-screened      | 20.0%                         | 14.3%       | 1.40 (1.45-2.18)                |         |
|                |             |             | never screened      | 8.7%                          | 7.2%        | 1.21 ( 1.96-3.84)               |         |

\* Definitions of categories of screening history in Tranberg, 2018

Regularly screened:

Age 30-34 y; 56-64y: =2 cervical cytology samples were registered

Age 35-55y: =3 cervical cytology samples were registered

Underscreened:

Age 30-34 y; 56-64y: only one cervical cytology sample registered

Age 35-55y: 1 or 2 cervical cytology samples were registered

Never screened: no cervical cytology sample was registered (registry covers 15 years of screening)

† p valued for heterogeneity by category of screening history (computed according the Mantel-Haenszel method)



**Table 17.** Test for publication bias (small sample effects) in the relative participation (self-sampling arm vs control arm).

| Scenario    | Analysis           | Harbord's p value |
|-------------|--------------------|-------------------|
| Mail-to-all | Per protocol       | 0.409             |
|             | Intention-to-treat | 0.360             |
| Opt-in      | Per protocol       | 0.094             |
|             | Intention-to-treat | 0.133             |

## 11. Specimen adequacy, test positivity rate, follow-up adherence, detection of CIN2+

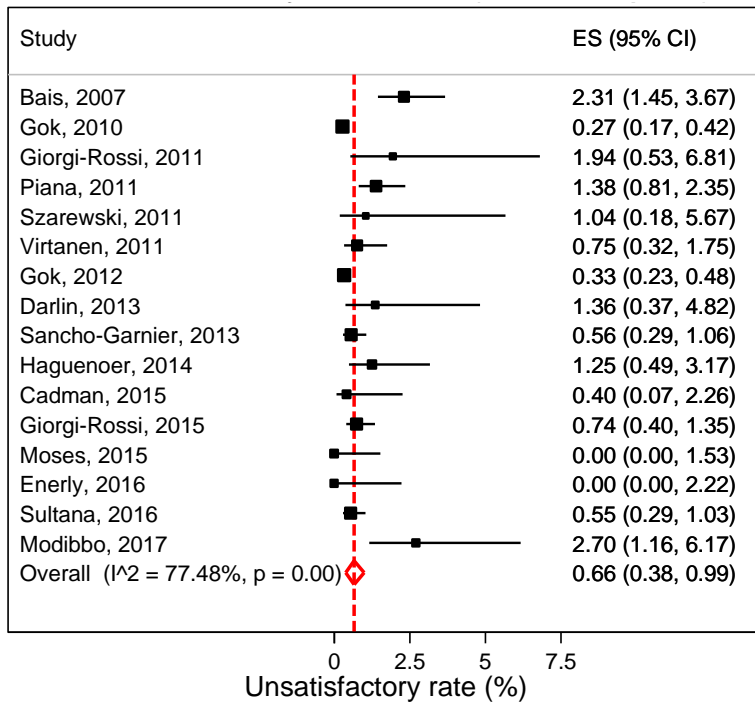

**Figure 12.** Proportion of self-samples that was unsatisfactory for hrHPV testing.

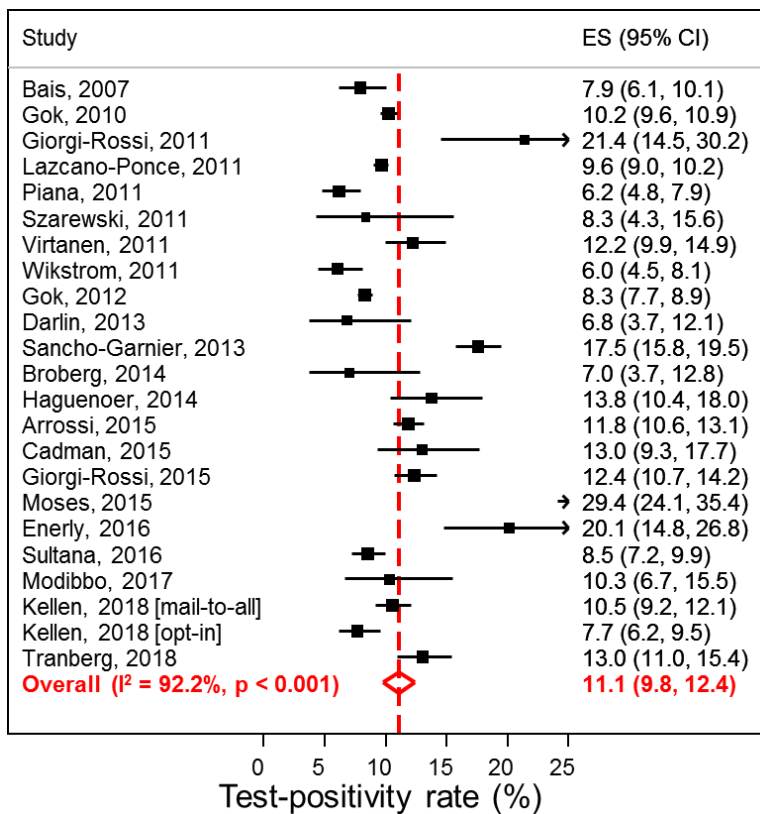

**Figure 13.** hrHPV test positivity in self-samples (experimental arm).

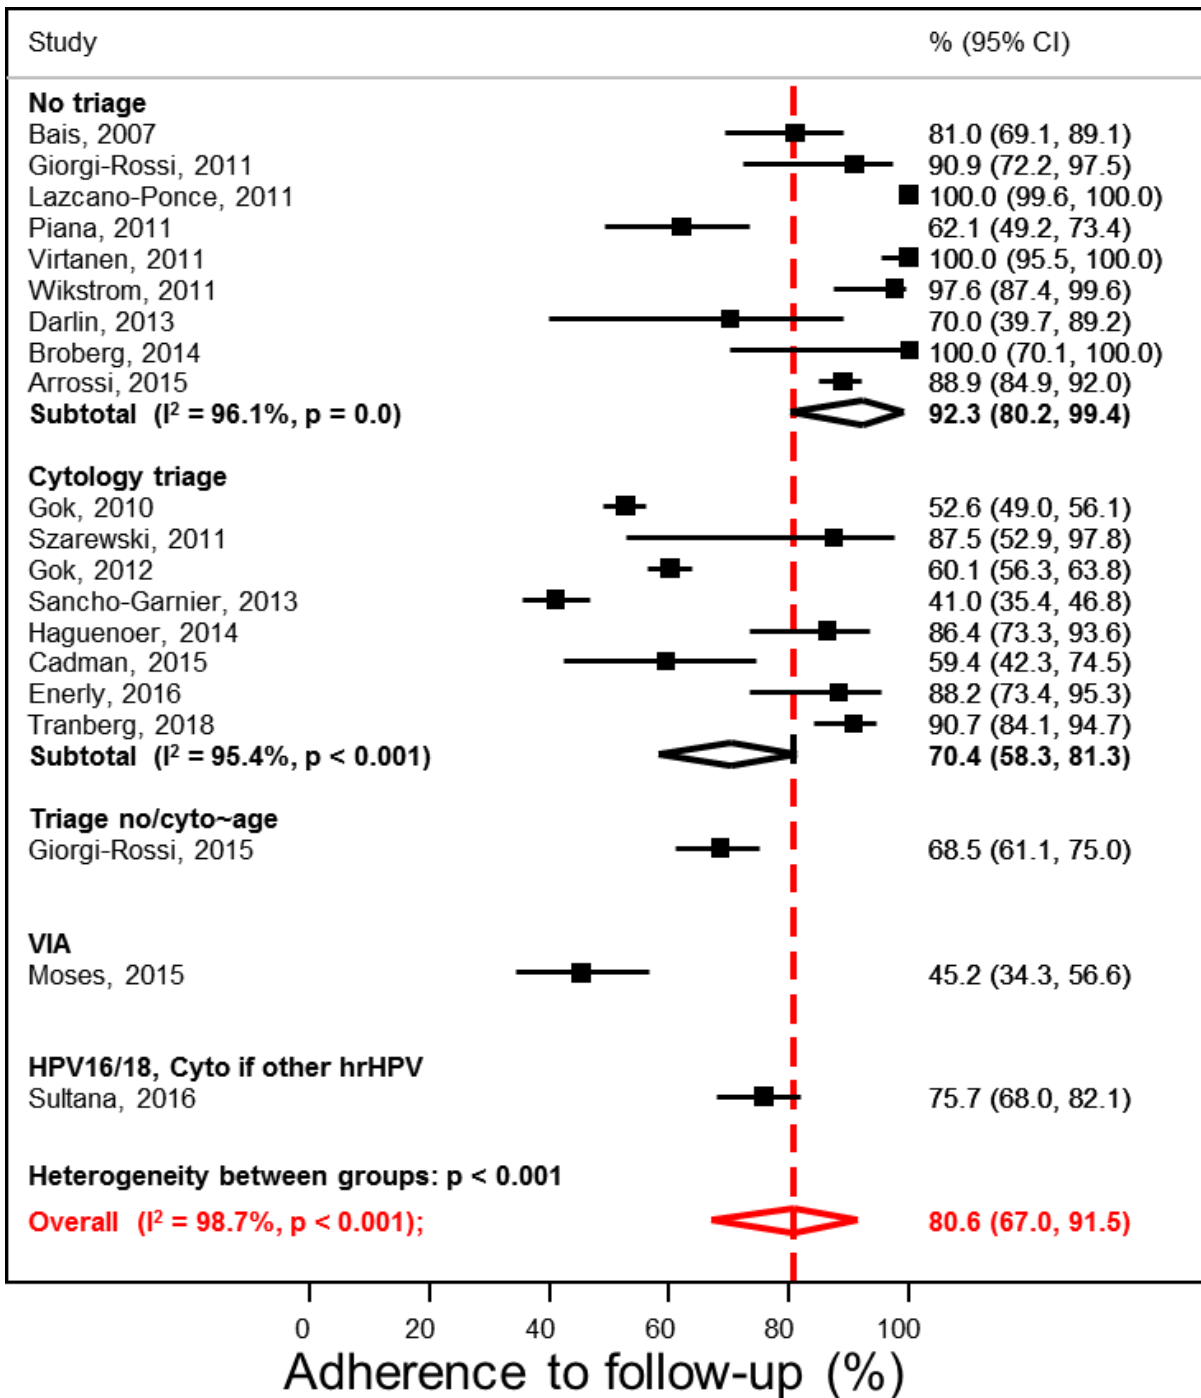

**Figure 14.** Follow-up adherence among women with a positive hrHPV test result on their self-sample, stratified by the applied triage policy (in the self-sampling arm of RCTs).

**Abbreviations**

VIA: visual inspection after application of acetic acid; HPV: hr: high-risk; HPV: human papilloma virus;

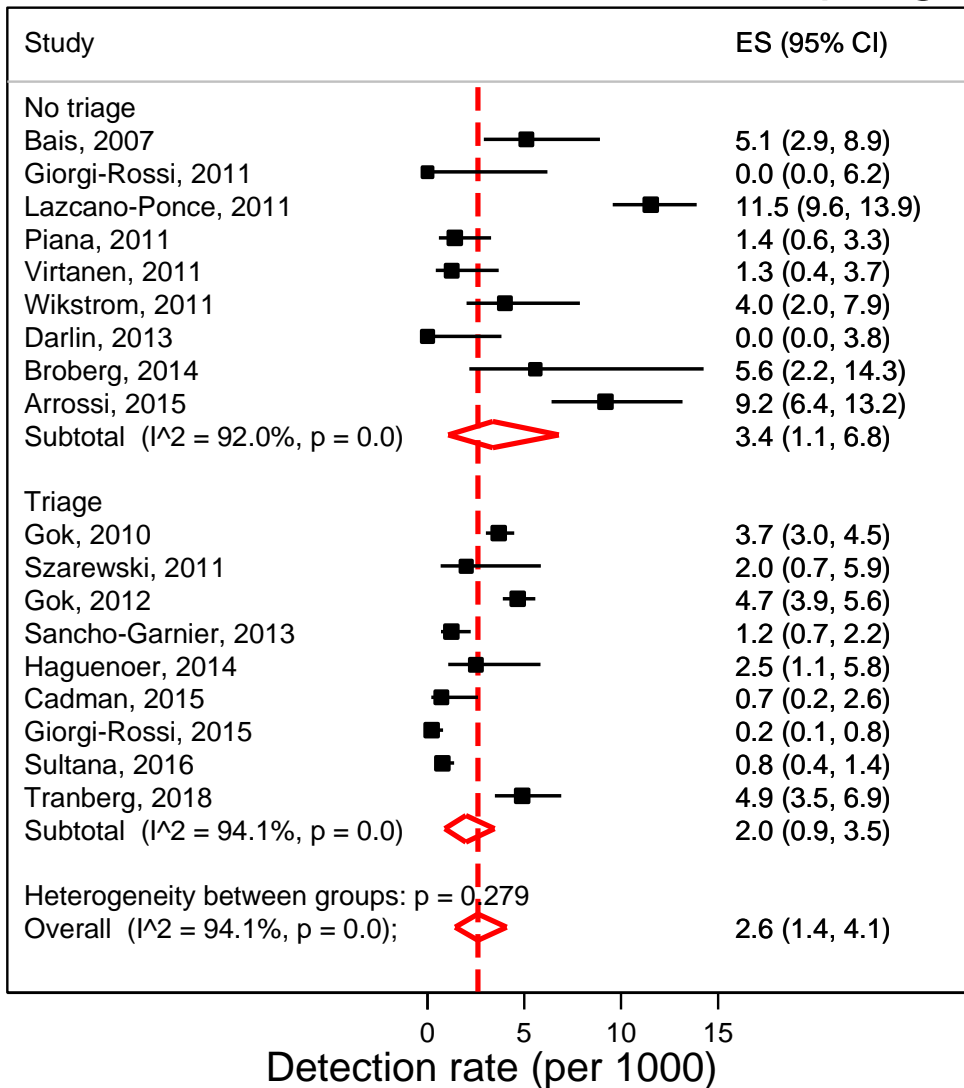

**Figure 15.** Detection of CIN2+ per 1000 invited women in the self-sampling arm, stratified by triage policy.

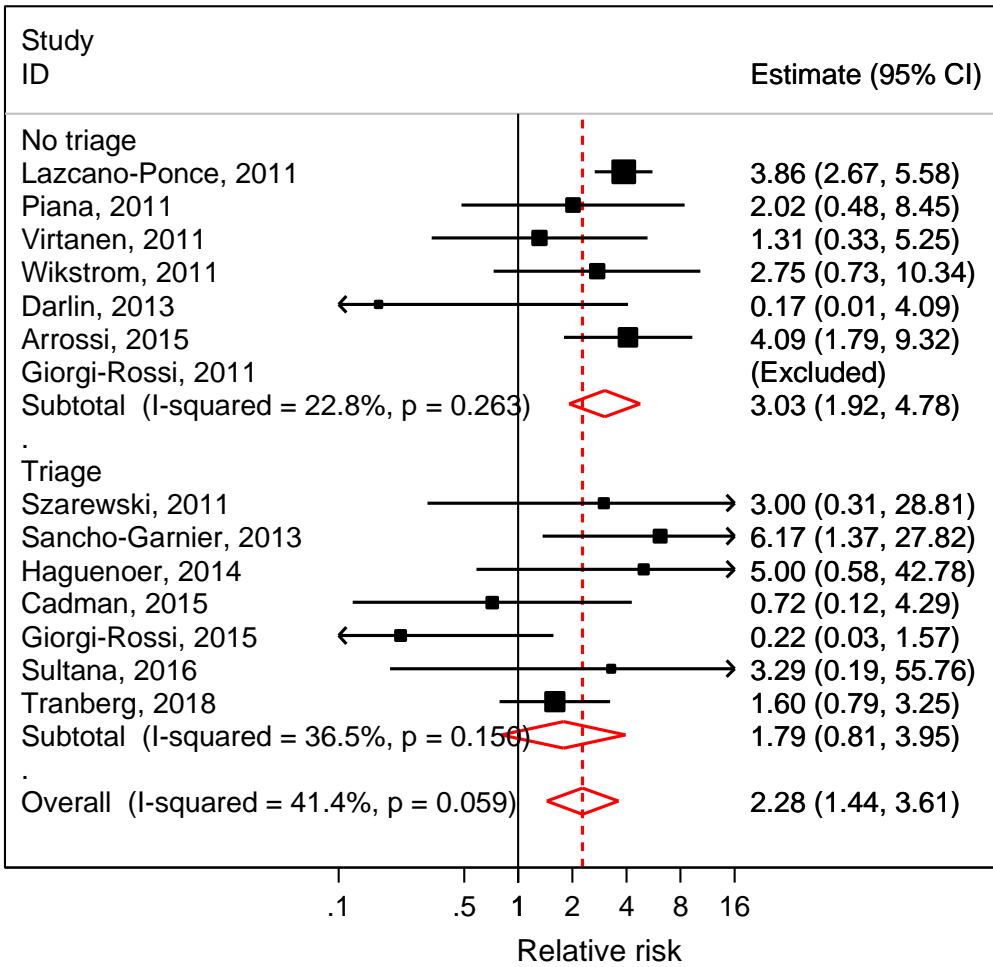

**Figure 16.** Relative detection of CIN2+ in the self- compared to the control arm among invited women, by triage policy in the self-sampling arm.

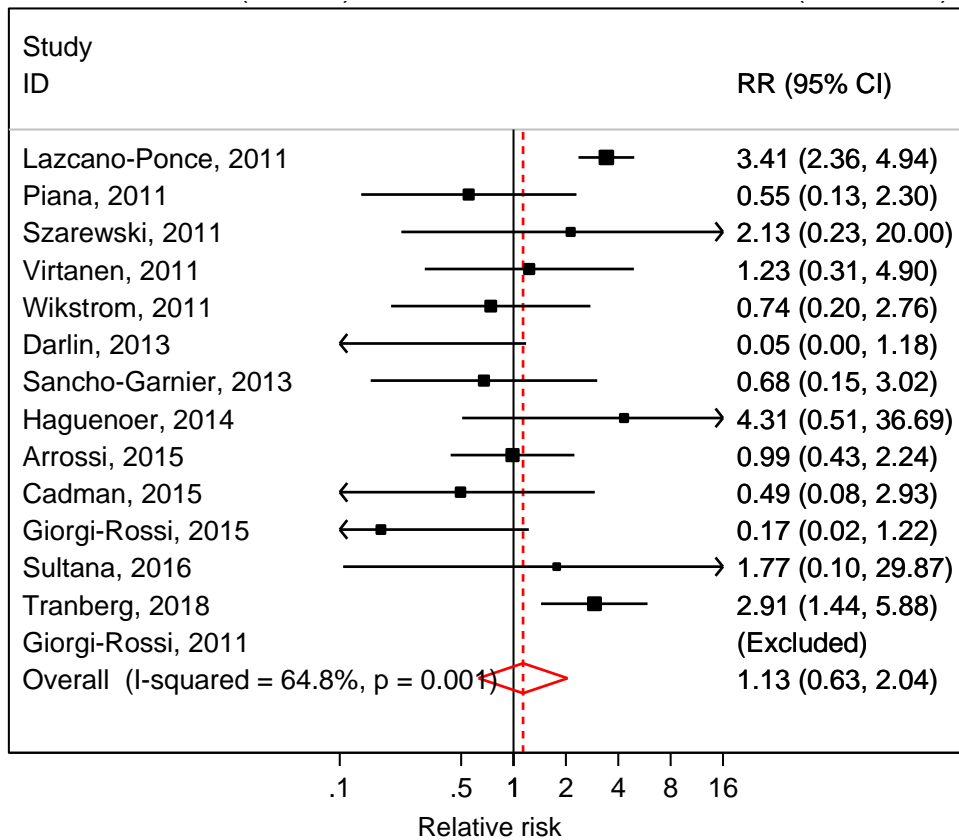

**Figure 17.** Relative detection of CIN2+ in the self-sampling compared to the control arm among screened women.

## 12. Research agenda

**Table 18.** Research agenda: propositions for studies involving HPV testing on self-samples.

| Item | Proposition for new study/guideline development                                                                                                                                                                                                                                                                                                                     |
|------|---------------------------------------------------------------------------------------------------------------------------------------------------------------------------------------------------------------------------------------------------------------------------------------------------------------------------------------------------------------------|
| 1    | Diagnostic test accuracy studies involving multiple device/HPV assay and storage medium/HPV assay combinations using accuracy the HPV assay test on a cervical clinician-taken sample as standard comparator test, with correlation between analytic outcomes and clinical outcomes (sensitivity, specificity for CIN2/3+), allowing for test cut-off optimisation. |
| 2    | Evaluation of the relative accuracy of HPV testing on urine vs vaginal self-samples vs cervical clinician collected samples.                                                                                                                                                                                                                                        |
| 3    | Extension of the current meta-analysis including also HPV testing on urine specimens. specimen.                                                                                                                                                                                                                                                                     |
| 4    | Continuous update of meta-analyses. An editor of a journal with good impact factor may be approached for online updates of important meta-analysis.                                                                                                                                                                                                                 |
| 5    | Definition of validation requirements for HPV testing on self-samples, similar to the international validation criteria for new HPV tests for primary cervical cancer screening on clinician samples.                                                                                                                                                               |
| 6    | Randomised participation trials or other controlled pilot studies in each country or region planning introduction of self-sampling.                                                                                                                                                                                                                                 |
| 7    | Randomised participation trials involving general practitioners, with an intervention arm where under-screened women receive a self-sampling kit when they contact the practice for whatever reason. Preliminary small scale studies suggest substantially higher response rates than send-to-all or opt-in self-sampling strategies.                               |
| 8    | Individual-patient-data (IPD) meta-analysis of participation trials allowing for more precise assessment of the influence of population characteristics on study outcomes which is currently not assessable from aggregated data published in the peer-reviewed literature.                                                                                         |
| 9    | Participation trials in developing countries where other designs than home-visits are applied.                                                                                                                                                                                                                                                                      |
| 10   | Evaluation of the diagnostic test accuracy of molecular markers applicable on self-specimen, which can be used to triage women with a hrHPV-positive self-sample avoiding the necessity of an additional visit for the collection of a cervical sample by a clinician.                                                                                              |
| 11   | Potential of self-sampling as a first option in primary cervical cancer screening as an alternative for the collection of a cervical sample by a clinician.                                                                                                                                                                                                         |

### 13. Reference List

- (1) Arbyn M, Verdoodt F, Snijders PJF et al. Accuracy of human papillomavirus testing on self-collected versus clinician-collected samples: a meta-analysis. *Lancet Oncol* 2014; 15:172-83.
- (2) Lazcano-Ponce E, Lorincz AT, Cruz-Valdez A et al. Self-collection of vaginal specimens for human papillomavirus testing in cervical cancer prevention (MARCH): a community-based randomised controlled trial. *Lancet* 2011; 378:1868-73.
- (3) Wikstrom I, Lindell M, Sanner K, Wilander E. Self-sampling and HPV testing or ordinary Pap-smear in women not regularly attending screening: a randomised study. *Br J Cancer* 2011; 105:337-9.
- (4) Jeronimo J, Bansil P, Lim J et al. A multicountry evaluation of careHPV testing, visual inspection with acetic acid, and Papanicolaou testing for the detection of cervical cancer. *Int J Gynecol Cancer* 2014; 24:576-85.
- (5) Verdoodt F, Jentschke M, Hillemanns P, Racey CS, Snijders PJF, Arbyn M. Reaching women who do not participate in the regular cervical cancer screening program by offering self-sampling kits: A systematic review and meta-analysis of randomised trials. *Eur J Cancer* 2015; 51:2375-85.
- (6) Arbyn M, Snijders PJ, Meijer CJLM et al. Which high-risk HPV assays fulfil criteria for use in primary cervical cancer screening? *Clin Microbiol Infect* 2015; 21:817-26.
- (7) Hesselink AT, Sahli R, Berkhof J et al. Clinical validation of Anyplex II HPV HR Detection according to the guidelines for HPV test requirements for cervical cancer screening. *J Clin Virol* 2016; 76:36-9.
- (8) Xu L, Ostrbenk A, Poljak M, Arbyn M. Assessment of the Roche Linear Array HPV genotyping test within the VALGENT framework. *J Clin Virol* 2018; 98:37-42.
- (9) Cuschieri K, Geraets D, Cuzick J et al. Performance of a cartridge based assay for the detection of clinically significant HPV infection - lessons from VALGENT (Validation of HPV Genotyping Tests). *J Clin Microbiol* 2016; 54:2337-47.
- (10) Whiting PF, Rutjes AW, Westwood ME et al. QUADAS-2: a revised tool for the quality assessment of diagnostic accuracy studies. *Ann Intern Med* 2011; 155:529-36.
- (11) Higgins JP, Altman DG, Gotzsche PC et al. The Cochrane Collaboration's tool for assessing risk of bias in randomised trials. *BMJ* 2011; 343:d5928.
- (12) Deeks JJ, Macaskill P, Irwig L. The performance of tests of publication bias and other sample size effects in systematic reviews of diagnostic test accuracy was assessed. *J Clin Epidemiol* 2005; 58:882-93.
